# Supplementary material for: GWAS on retinal vasculometry phenotypes
Source: PLoS Genet. 2023 Feb 9;19(2):e1010583. doi: 10.1371/journal.pgen.1010583 (PMC9910644; doi:10.1371/journal.pgen.1010583)
Supplement: S1 Table — Table A. GWAS quality control metrics. Table B: Genetic intercorrelations between the four retinal vasculature parameters. Table C. Most significant associations observed for the traits of interest. Table D. Replication of GWAS results in the EPIC-Norfolk cohort. Table E. Results of the meta-analyses of the UK Biobank and EPIC-Norfolk cohorts. Table F. Known loci replicated in trans-ancestry analysis combining Asian, African and European analysis. Table G. eQTL effects of SNPs associated in the GWAS. Table H. Functional analyses of causation for SNPs associated with AT. Table I: Ldsc genetic correlation between retinal parameters and systemic traits and disease. Table J. Mendelian randomisation analyses testing causality of vascular changes over metabolic traits. Table K. Mendelian randomisation analyses testing causality of metabolic traits over vascular changes. Table L. Replication of GWAS results in a recent publication (Zekavat BS et al., 2021). Table M. Comparison of part associations observed for the traits of interest with additional covariates (age2, smoking, diabetes). (XLSX) [file pgen.1010583.s003.xlsx]

## Sheet: TOC
Table A	GWAS quality control metrics
Table B	Genetic intercorrelations between the four retinal vasculature parameters
Table C	Most significant associations observed for the traits of interest
Table D	Replication of GWAS results in the EPIC-Norfolk cohort
Table E	Results of the meta-analyses of the UK Biobank and EPIC-Norfolk cohorts
Table F	Known loci replicated in trans-ancestry analysis combining Asian, African and European analysis
Table G	eQTL effects of SNPs associated in the GWAS
Table H	Functional analyses of causation for SNPs associated with AT
Table I	Ldsc genetic correlation between retinal parameters and systemic traits and disease
Table J	Mendelian randomisation analyses testing causality of vascular changes over metabolic traits
Table K	Significant Mendelian randomisation analyses results of causality of metabolic traits over vasculature changes
Table L	Replication of GWAS results in a recent publication (Zekavat BS et al., 2021)
Table M	Comparison of part associations observed for the traits of interest with additional covariates (age2, smoking, diabetes)
Legends	Legends of all supplementary tables

## Sheet: Table A
Table A. GWAS quality control metrics						Legend
Phenotypes	h2	Lambda	Intercepter	ratio		TOC
Arteriolar Tortuosity	0.5116	1.2005	1.0436	0.0998
Arteriolar Width	0.1012	1.0957	1.0143	0.1517
Venular Tortuosity	0.178	1.0957	1.0204	0.1294
Venular Width	0.1632	1.0957	1.0064	0.0466

## Sheet: Table B
Table B. Genetic intercorrelations between the four retinal vasculature parameters						Legend
phenotypes	Arteriolar Tortuosity	Arteriolar Width	Venular Tortuosity	Venular Width		TOC
Arteriolar Tortuosity	1	0.1888	0.3773	0.0647
Arteriolar Width		1	-0.0558	0.4359
Venular Tortuosity			1	-0.1885
Venular Width				1

## Sheet: Table C
Table C. Most significant associations observed for the traits of interest												Legend
Trait	Chr	Pos	SNP	Ref. Allele	Other Allele	Nearest Gene	Ref. Allele Freq	Effect	SE	P.value		TOC
Arteriolar Tortuosity	1	3038623	rs2742672	A	G	PRDM16	0.631937	0.0154833	0.00302799	2.4e-08
Arteriolar Tortuosity	1	6765536	1:6765536_AT_A	AT	A	DNAJC11	0.683085	0.0181652	0.00314736	1.5e-09
Arteriolar Tortuosity	1	22249836	rs9426677	C	T	HSPG2	0.75931	-0.0199019	0.00341824	1.2e-09
Arteriolar Tortuosity	1	68257907	1:68257907_ATGT_A	ATGT	A	GNG12	0.75725	-0.0212348	0.00343607	5.2e-10
Arteriolar Tortuosity	1	92327707	rs17881430	G	A	TGFBR3	0.692506	-0.0292289	0.00316636	1.3e-20
Arteriolar Tortuosity	1	110633706	rs35129491	A	AT	ALX3	0.645016	-0.0352705	0.00305156	1.4e-32
Arteriolar Tortuosity	1	150341917	1:150341917_ATTTTTTTTTTTTTTTTTT_A	ATTTTTTTTTTTTTTTTTT	A	RPRD2	0.686659	0.0377322	0.00323136	8e-33
Arteriolar Tortuosity	1	153899266	1:153899266_ATT_A	ATT	A	GATAD2B	0.701424	-0.0195514	0.00322598	4.2e-08
Arteriolar Tortuosity	1	169049738	rs1200099	C	T	ATP1B1	0.656293	0.0183838	0.00308988	2.3e-09
Arteriolar Tortuosity	1	170392984	1:170392984_AC_A	AC	A	GORAB	0.729208	0.0208481	0.0032987	8.3e-11
Arteriolar Tortuosity	1	183585401	rs59587284	T	C	ARPC5	0.759792	-0.0215411	0.00383793	1.6e-08
Arteriolar Tortuosity	1	201886769	1:201886769_TA_T	TA	T	LMOD1	0.66962	0.0228153	0.00310205	9.5e-15
Arteriolar Tortuosity	1	227501550	rs776003769	AAC	A	CDC42BPA	0.86069	-0.0287869	0.00423292	7.5e-13
Arteriolar Tortuosity	2	1568378	rs150606467	G	A	TPO	0.960174	-0.0511191	0.00764576	5e-12
Arteriolar Tortuosity	2	11343598	rs146026436	C	CT	ROCK2	0.953261	0.0600334	0.00698818	4.1e-20
Arteriolar Tortuosity	2	46293826	rs114948639	C	T	PRKCE	0.987914	0.0819281	0.0137422	6.7e-10
Arteriolar Tortuosity	2	112268784	rs145242747	C	T	ANAPC1	0.724502	0.0251942	0.00328189	1.6e-16
Arteriolar Tortuosity	2	134274625	rs1966628	C	T	NCKAP5	0.602281	0.0209513	0.00298941	4.5e-14
Arteriolar Tortuosity	2	212038434	rs200523246	AT	A	ERBB4	0.645516	-0.0210043	0.00309093	1.8e-11
Arteriolar Tortuosity	2	218695102	rs3796028	G	A	TNS1	0.645848	-0.0487527	0.00305572	2.1e-62
Arteriolar Tortuosity	2	242392759	rs28446330	T	C	FARP2	0.896995	-0.039465	0.00483239	4.3e-16
Arteriolar Tortuosity	3	20162869	rs75482782	T	G	KAT2B	0.924016	-0.0345692	0.00558363	7.4e-10
Arteriolar Tortuosity	3	123761800	rs72970952	A	C	ROPN1	0.865362	0.0227072	0.00431419	2.3e-09
Arteriolar Tortuosity	3	149548794	rs2130320	G	A	RNF13	0.677285	-0.0216362	0.0031345	2.1e-11
Arteriolar Tortuosity	4	8270320	rs6833227	G	T	HTRA3	0.717439	0.0325937	0.00327667	4e-25
Arteriolar Tortuosity	4	85029914	rs1950127	G	A	--	0.603383	0.0508878	0.00299119	1.8e-68
Arteriolar Tortuosity	4	120278368	rs62320736	C	G	FABP2	0.830686	-0.05935	0.00389385	3.1e-55
Arteriolar Tortuosity	4	186776746	rs1566354	C	T	SORBS2	0.770013	-0.0196903	0.00348761	1.2e-09
Arteriolar Tortuosity	5	1111657	rs6883753	G	A	SLC12A7	0.659637	-0.0172085	0.00313944	1.2e-08
Arteriolar Tortuosity	5	52135543	rs6867399	C	A	ITGA1	0.721314	-0.0187566	0.00337205	1.3e-08
Arteriolar Tortuosity	5	63888835	rs10805388	A	C	RGS7BP	0.703396	-0.0194663	0.00320787	7.8e-10
Arteriolar Tortuosity	5	77987524	rs784420	A	G	LHFPL2	0.715425	-0.0430688	0.00324112	4.1e-42
Arteriolar Tortuosity	5	89523523	rs1019992	T	C	CETN3	0.881768	-0.0275412	0.00454743	1e-09
Arteriolar Tortuosity	5	132093994	rs42403	C	T	SEPTIN8	0.885849	-0.0263183	0.0046309	1.3e-09
Arteriolar Tortuosity	5	149509446	rs41287110	C	T	PDGFRB	0.974488	0.0603698	0.00928564	2e-11
Arteriolar Tortuosity	6	844122	rs11243209	G	A	GABBR1	0.743145	-0.0321303	0.00341876	3.2e-22
Arteriolar Tortuosity	6	7242605	rs11752007	T	C	RREB1	0.87362	-0.0241073	0.0044421	1.1e-08
Arteriolar Tortuosity	6	12476696	rs9296392	A	C	EDN1	0.830994	0.0366341	0.00392054	1.3e-24
Arteriolar Tortuosity	6	31100331	rs751513188	A	AAATA	DPCR1	0.865459	0.0253849	0.00441269	3.7e-09
Arteriolar Tortuosity	6	39888734	rs71571397	G	C	MOCS1	0.938604	-0.0536045	0.00615121	1.6e-18
Arteriolar Tortuosity	6	141666940	6:141666940_TTTC_T	TTTC	T	--	0.777036	0.0205092	0.00354736	8e-10
Arteriolar Tortuosity	6	150980287	6:150980287_CTT_C	CTT	C	PLEKHG1	0.939474	0.0560452	0.0063825	1.7e-21
Arteriolar Tortuosity	7	45229316	rs10951805	G	A	RAMP3	0.784967	0.0246697	0.00358243	3.2e-14
Arteriolar Tortuosity	8	26004921	rs771385814	CAA	C	PPP2R2A	0.819948	-0.0175291	0.0038551	4.7e-08
Arteriolar Tortuosity	8	38424123	rs10958733	T	C	RNF5P1	0.897648	0.0482905	0.0048281	2.1e-26
Arteriolar Tortuosity	8	55330814	rs13258851	G	A	SOX17	0.89778	-0.0265216	0.00485722	1.4e-09
Arteriolar Tortuosity	8	73975469	rs34841339	C	CT	SBSPON	0.925215	0.033033	0.00572741	4.9e-08
Arteriolar Tortuosity	8	109156783	rs396498	C	A	EIF3E	0.767025	-0.0237747	0.00348543	1.6e-11
Arteriolar Tortuosity	9	94251806	rs62562579	G	A	NFIL3	0.702107	0.0267611	0.00321994	6.1e-19
Arteriolar Tortuosity	9	130325805	rs576435438	A	AT	FAM129B	0.730455	-0.0268724	0.0033831	4e-16
Arteriolar Tortuosity	9	136149830	rs532436	G	A	ABO	0.812785	-0.0290762	0.00377973	1.7e-16
Arteriolar Tortuosity	9	140500443	9:140500443_G_A	G	A	ARRDC1	0.97494	-0.0635614	0.010113	3.9e-10
Arteriolar Tortuosity	10	13998852	rs11258750	T	C	FRMD4A	0.71162	0.017397	0.00324991	5.3e-09
Arteriolar Tortuosity	10	105595430	rs10883922	C	G	SH3PXD2A	0.646766	0.0190921	0.00307374	5.1e-11
Arteriolar Tortuosity	10	119395398	rs181678	T	A	EMX2	0.710762	-0.0242686	0.00327681	2.3e-14
Arteriolar Tortuosity	10	129767088	rs11596263	C	T	PTPRE	0.978162	0.0483443	0.0100472	3.2e-08
Arteriolar Tortuosity	11	8890924	rs11042104	G	C	ST5	0.750551	0.021947	0.00339285	1.6e-09
Arteriolar Tortuosity	11	62303555	rs145590149	T	TCTC	AHNAK	0.971922	-0.0604165	0.00892816	2.6e-13
Arteriolar Tortuosity	11	69989135	rs35760498	A	G	ANO1	0.735458	-0.0368615	0.00332531	6.5e-31
Arteriolar Tortuosity	12	20589390	rs11045245	A	G	PDE3A	0.61865	-0.0488082	0.00303208	1.3e-64
Arteriolar Tortuosity	12	79967246	rs10861997	G	A	PAWR	0.858055	-0.0392846	0.0042238	1.4e-22
Arteriolar Tortuosity	13	28962686	rs17086617	T	C	FLT1	0.701902	-0.0353776	0.00321575	1.2e-29
Arteriolar Tortuosity	13	47299045	rs7333406	T	G	LRCH1	0.794213	0.0246002	0.00365321	2.7e-11
Arteriolar Tortuosity	13	72347501	rs932768	T	C	DACH1	0.616946	0.0168172	0.00303188	2.2e-09
Arteriolar Tortuosity	13	111104752	rs35131825	G	A	COL4A2	0.608258	-0.0630678	0.00302218	2e-108
Arteriolar Tortuosity	14	60808002	rs4436712	G	T	PPM1A	0.614036	-0.0180442	0.00304382	3.2e-10
Arteriolar Tortuosity	14	65190211	rs556305129	A	AAG	PLEKHG3	0.860762	0.0227643	0.00429468	2.9e-08
Arteriolar Tortuosity	14	76186376	rs2241442	A	G	TTLL5	0.747122	-0.0208383	0.00339109	6.2e-09
Arteriolar Tortuosity	14	105906522	rs56130943	A	C	MTA1	0.766167	-0.0499252	0.00355591	1.2e-46
Arteriolar Tortuosity	15	52059228	rs536034915	A	AT	TMOD2	0.604628	-0.02704	0.00309257	8.1e-19
Arteriolar Tortuosity	15	56305252	rs62046386	G	A	NEDD4	0.935749	0.0437272	0.00599536	2.8e-14
Arteriolar Tortuosity	15	75240030	rs8037798	T	G	COX5A	0.768018	-0.0402361	0.0035077	2e-32
Arteriolar Tortuosity	16	14097785	rs12926918	T	C	ERCC4	0.780312	0.0212037	0.00354957	3.2e-10
Arteriolar Tortuosity	16	75508453	rs12918234	C	T	CHST6	0.807041	0.0251099	0.003754	5.9e-12
Arteriolar Tortuosity	16	86386971	rs5020073	A	C	FOXF1	0.849265	0.0254024	0.00417312	5.4e-09
Arteriolar Tortuosity	17	2140668	rs216215	T	C	SMG6	0.717062	0.025794	0.00326633	5.3e-16
Arteriolar Tortuosity	17	56786453	17:56786453_CT_C	CT	C	RAD51C	0.662694	0.0250126	0.00320364	2.2e-15
Arteriolar Tortuosity	17	64124768	rs9897921	A	C	CEP112	0.895293	-0.0266211	0.00483071	1.9e-09
Arteriolar Tortuosity	17	68335967	rs34741950	A	G	KCNJ2	0.778309	0.0483675	0.00353671	1.2e-47
Arteriolar Tortuosity	17	75316880	rs1436138	A	G	SEPTIN9	0.64015	0.0184894	0.0030626	5.3e-10
Arteriolar Tortuosity	18	20638059	rs11662380	C	T	RBBP8	0.787298	0.0190967	0.00364139	7.6e-09
Arteriolar Tortuosity	19	14589068	rs76301301	T	G	GIPC1	0.81874	-0.0227292	0.00384371	2.3e-08
Arteriolar Tortuosity	19	39210593	rs62119115	G	A	ACTN4	0.757548	-0.0298121	0.00343125	1.6e-19
Arteriolar Tortuosity	19	46203916	rs11673709	A	C	QPCTL	0.848634	-0.0302455	0.0041945	1.7e-13
Arteriolar Tortuosity	20	33752110	rs143373163	G	T	EDEM2	0.913868	0.0327826	0.00526347	2.6e-10
Arteriolar Tortuosity	22	18322333	22:18322333_CTT_C	CTT	C	MICAL3	0.667047	-0.0194679	0.00316193	1.9e-09
Arteriolar Tortuosity	22	38180407	22:38180407_CAA_C	CAA	C	TRIOBP	0.678584	0.0162683	0.00315731	2e-08
Arteriolar Tortuosity	22	39647168	rs77516118	T	C	PDGFB	0.744201	0.0334888	0.00338492	1.9e-23
Arteriolar Tortuosity	22	40896670	rs139065	C	A	MKL1	0.614992	0.0165193	0.00304515	3.5e-09
Arteriolar Width	12	6954864	rs5442	G	A	GNB3	0.929117	0.74166	0.0933518	1.9e-15
Arteriolar Width	18	630788	rs12969347	G	A	CLUL1	0.927524	0.55464	0.0938345	3.3e-09
Venular Tortuosity	1	6681262	rs11122106	A	G	PHF13	0.667661	0.0137247	0.00195743	1.1e-12
Venular Tortuosity	1	227409303	rs532863297	C	CT	CDC42BPA	0.797231	0.0131765	0.00237255	7.8e-09
Venular Tortuosity	2	134277480	rs6430425	C	T	NCKAP5	0.602238	0.0132281	0.00187487	2.6e-12
Venular Tortuosity	2	218694691	rs10188605	A	G	TNS1	0.643555	-0.0147654	0.00191785	3e-14
Venular Tortuosity	2	239779504	2:239779504_CCACA_C	CCACA	C	TWIST2	0.892789	0.0185576	0.00333	2.9e-08
Venular Tortuosity	2	242392759	rs28446330	T	C	FARP2	0.896995	-0.0203705	0.00303091	1.6e-11
Venular Tortuosity	3	8497234	rs115929714	G	A	LMCD1	0.948795	-0.0308724	0.00417159	1.4e-13
Venular Tortuosity	4	146962889	rs150457995	T	TTTC	ZNF827	0.618562	-0.0109159	0.00189806	2.2e-09
Venular Tortuosity	5	77974427	rs168189	C	T	LHFPL2	0.724612	-0.0187565	0.00206451	4.7e-20
Venular Tortuosity	7	96496658	rs2948244	G	C	DLX6	0.657035	0.0185289	0.00193365	4.3e-23
Venular Tortuosity	9	125026664	rs7034992	G	A	RBM18	0.645	-0.0117375	0.00196482	7.1e-10
Venular Tortuosity	9	130325805	rs576435438	A	AT	FAM129B	0.730455	-0.0171649	0.0021105	3.7e-17
Venular Tortuosity	15	77807175	rs12911963	G	C	HMG20A	0.666166	-0.0144115	0.00195034	7.1e-14
Venular Tortuosity	16	51455794	rs11859314	G	A	--	0.710098	0.0121009	0.00204247	2.8e-09
Venular Tortuosity	17	70387448	rs12603193	A	G	--	0.630392	-0.0103802	0.0018979	3.6e-08
Venular Tortuosity	17	75389267	rs364530	C	T	SEPTIN9	0.783704	0.0139411	0.002239	4.4e-10
Venular Tortuosity	19	39219780	rs1136956	T	C	ACTN4	0.757245	-0.0335765	0.00213453	6e-58
Venular Width	1	196836429	rs10630670	T	TG	CFHR4	0.733564	0.527334	0.0886351	8.6e-10
Venular Width	5	87919700	rs115456027	C	T	MEF2C	0.923242	-1.0667	0.143645	6.4e-14
Venular Width	6	142363726	rs12206319	C	T	NMBR	0.795639	0.727124	0.0945712	1.4e-14
Venular Width	8	10832865	rs6601542	A	G	XKR6	0.621592	0.473321	0.0791087	1.5e-09
Venular Width	8	130183779	rs77391671	A	T	--	0.883804	-0.659094	0.118464	1.6e-08
Venular Width	10	69963180	rs553833452	T	TA	MYPN	0.812293	-0.572206	0.0997173	1.4e-08
Venular Width	13	28991902	rs34961350	C	G	FLT1	0.784601	-0.602183	0.0930949	1.4e-10
Venular Width	15	53775605	rs8030213	T	C	WDR72	0.727853	0.549504	0.0864032	3e-10
Venular Width	19	49214748	rs281381	T	C	FUT2	0.664873	0.576919	0.0807576	4.4e-13
Venular Width	20	22695089	rs7265807	C	T	FOXA2	0.686822	-0.471523	0.081953	8e-09
Venular Width	21	39872696	rs2836445	G	A	ERG	0.615857	0.432667	0.0780508	3.3e-08

## Sheet: Table D
Table D. Replication of GWAS results in the EPIC-Norfolk cohort											Legend
Trait	Chr	Pos	SNP	Ref. Allele	Other Allele	Ref. Allele Freq	Effects	SE	P.value		TOC
Arteriolar Tortuosity	1	3264190	rs2483289	C	A	0.697376	-0.0212441	0.0100926	0.035349
Arteriolar Tortuosity	1	22249836	rs9426677	T	C	0.236277	-0.0022532	0.0111506	0.839872
Arteriolar Tortuosity	1	68314967	rs12118331	A	C	0.263192	0.0156235	0.0107081	0.144618
Arteriolar Tortuosity	1	92327707	rs17881430	A	G	0.309016	0.01617	0.0101212	0.110187
Arteriolar Tortuosity	1	150255587	rs2147324	C	T	0.520639	0.0392251	0.0093572	2.81e-05
Arteriolar Tortuosity	1	169018902	rs3007364	A	G	0.657417	0.0102873	0.0097664	0.292237
Arteriolar Tortuosity	1	187328545	rs2802474	G	A	0.627766	0.0044324	0.0098684	0.653344
Arteriolar Tortuosity	2	1568378	rs150606467	A	G	0.0399106	0.0426449	0.0243068	0.0794159
Arteriolar Tortuosity	2	46293826	rs114948639	T	C	0.0102981	-0.0373346	0.0476236	0.433106
Arteriolar Tortuosity	2	54847675	rs11125543	A	C	0.586905	0.0126376	0.0095694	0.186687
Arteriolar Tortuosity	2	134303364	rs10170172	A	G	0.477426	-0.0203812	0.0093639	0.0295599
Arteriolar Tortuosity	2	212031854	rs12694223	C	T	0.531035	-0.0161912	0.0093601	0.0837253
Arteriolar Tortuosity	2	218670945	rs2571461	G	T	0.612408	-0.0494999	0.0096771	3.25e-07
Arteriolar Tortuosity	2	242392759	rs28446330	C	T	0.0985668	0.0528891	0.0158677	0.0008651
Arteriolar Tortuosity	3	20171631	rs59213344	T	G	0.0567449	0.0056787	0.0201781	0.778392
Arteriolar Tortuosity	3	123761800	rs72970952	C	A	0.134185	-0.0087649	0.0137137	0.522764
Arteriolar Tortuosity	3	149548794	rs2130320	A	G	0.327055	0.0120478	0.0099009	0.223722
Arteriolar Tortuosity	4	8270320	rs6833227	T	G	0.29087	-0.0377564	0.0102822	0.0002432
Arteriolar Tortuosity	4	85029012	rs9992012	C	G	0.408454	-0.0254804	0.0095821	0.0078586
Arteriolar Tortuosity	4	169652929	rs2047634	A	G	0.565281	0.0374776	0.0093912	6.68e-05
Arteriolar Tortuosity	4	186776746	rs1566354	T	C	0.224925	0.0209632	0.0111665	0.0605322
Arteriolar Tortuosity	5	1110797	rs6864465	C	T	0.613408	-0.0202909	0.0096561	0.0356612
Arteriolar Tortuosity	5	52155642	rs73102285	G	A	0.241843	0.0222729	0.0108749	0.0406038
Arteriolar Tortuosity	5	63883464	rs12514312	C	T	0.297875	0.0048738	0.0102163	0.633337
Arteriolar Tortuosity	5	71746782	rs9293308	G	C	0.881748	0.015138	0.0143054	0.290016
Arteriolar Tortuosity	5	121518309	rs9112	A	G	0.417861	-0.0169492	0.0094973	0.0743809
Arteriolar Tortuosity	5	132127821	rs171770	A	C	0.121292	0.0264122	0.0142184	0.0632841
Arteriolar Tortuosity	5	149509446	rs41287110	T	C	0.0264379	-0.0187091	0.0294213	0.52487
Arteriolar Tortuosity	5	159488678	rs12523151	C	T	0.570107	0.0031719	0.0095906	0.740866
Arteriolar Tortuosity	6	1385814	rs9405472	A	C	0.566773	0.0240579	0.009862	0.0147444
Arteriolar Tortuosity	6	7242605	rs11752007	C	T	0.121132	0.0018202	0.0144151	0.899523
Arteriolar Tortuosity	6	12484683	rs9394914	T	A	0.16195	-0.0321859	0.0127994	0.0119472
Arteriolar Tortuosity	6	31360389	rs2523477	C	T	0.090111	0.0264336	0.0162078	0.10297
Arteriolar Tortuosity	6	157221536	rs287947	G	A	0.192316	-0.0111069	0.0119776	0.353811
Arteriolar Tortuosity	7	139332000	rs1464798	A	G	0.436256	0.0152752	0.0094782	0.107108
Arteriolar Tortuosity	8	18941575	rs9657494	A	G	0.495194	0.0134097	0.0094118	0.154283
Arteriolar Tortuosity	8	38424123	rs10958733	C	T	0.105417	-0.0638601	0.0151328	2.49e-05
Arteriolar Tortuosity	8	55330814	rs13258851	A	G	0.0960193	0.0218172	0.0160107	0.173051
Arteriolar Tortuosity	8	109156782	rs407432	A	T	0.237496	-0.0027814	0.0110517	0.801304
Arteriolar Tortuosity	9	94252964	rs10991952	G	A	0.298849	-0.0268298	0.0103149	0.009321
Arteriolar Tortuosity	10	13999224	rs2446573	C	G	0.707565	-0.0019345	0.0106827	0.856304
Arteriolar Tortuosity	10	105595430	rs10883922	G	C	0.348855	-0.0023543	0.0098455	0.81102
Arteriolar Tortuosity	10	119391213	rs181676	A	G	0.294824	0.0187648	0.0103206	0.0690939
Arteriolar Tortuosity	10	129781253	rs11015991	A	G	0.273709	0.006009	0.0104785	0.566363
Arteriolar Tortuosity	11	8890924	rs11042104	C	G	0.247035	-0.0227991	0.01086	0.0358357
Arteriolar Tortuosity	11	70004367	rs12295837	A	G	0.275446	0.0256688	0.0103581	0.0132405
Arteriolar Tortuosity	12	20589390	rs11045245	G	A	0.382644	0.0348348	0.0096392	0.0003047
Arteriolar Tortuosity	12	80088578	rs12827748	C	T	0.671898	-0.038295	0.0099622	0.0001226
Arteriolar Tortuosity	12	116863148	rs7315837	A	G	0.782791	-0.0375464	0.0112557	0.0008569
Arteriolar Tortuosity	13	28962686	rs17086617	C	T	0.300986	0.0273032	0.0102712	0.0078802
Arteriolar Tortuosity	13	72347501	rs932768	C	T	0.381837	-0.0305325	0.0097176	0.0016879
Arteriolar Tortuosity	13	111085411	rs9559797	C	G	0.586276	-0.080208	0.009513	4.43e-17
Arteriolar Tortuosity	14	21494477	rs3748344	T	C	0.382429	-0.0081818	0.0098507	0.406254
Arteriolar Tortuosity	14	61072875	rs10483727	C	T	0.604137	-0.0306631	0.0095159	0.00128
Arteriolar Tortuosity	14	76109364	rs7140617	A	C	0.748173	-0.0175966	0.0106861	0.0996863
Arteriolar Tortuosity	14	105954705	rs55633823	T	C	0.247427	0.054866	0.0109819	6.05e-07
Arteriolar Tortuosity	15	52106301	rs2009972	A	G	0.444326	0.0080548	0.0094182	0.392463
Arteriolar Tortuosity	15	57846706	rs2932208	G	A	0.219072	-0.0261225	0.01132	0.0210601
Arteriolar Tortuosity	15	70973041	rs7178037	T	C	0.0966685	-0.0339325	0.0157456	0.0312061
Arteriolar Tortuosity	15	75065644	rs4886410	C	G	0.674056	-0.0409087	0.0098558	3.37e-05
Arteriolar Tortuosity	16	14097785	rs12926918	C	T	0.214326	-0.0149438	0.0114245	0.190917
Arteriolar Tortuosity	16	49628163	rs11646857	A	G	0.410864	0.0016427	0.009677	0.865208
Arteriolar Tortuosity	16	86385102	rs139379798	A	C	0.0138953	-0.0988045	0.0419807	0.0186332
Arteriolar Tortuosity	17	1970201	rs4790870	A	C	0.610189	0.0062617	0.0097194	0.519445
Arteriolar Tortuosity	17	64124768	rs9897921	C	A	0.107654	0.0255147	0.0150852	0.0908284
Arteriolar Tortuosity	17	68335967	rs34741950	G	A	0.219033	-0.0452725	0.0112727	6e-05
Arteriolar Tortuosity	17	74684858	rs7219390	C	T	0.443126	0.0217619	0.0094027	0.0206849
Arteriolar Tortuosity	18	20461282	rs3863524	A	G	0.761842	0.0123487	0.0110854	0.265352
Arteriolar Tortuosity	18	56947183	rs670632	C	A	0.71706	0.008003	0.0104031	0.441757
Arteriolar Tortuosity	19	14589068	rs76301301	G	T	0.178926	0.0180966	0.0121974	0.137966
Arteriolar Tortuosity	19	46203916	rs11673709	C	A	0.152585	0.024676	0.013581	0.0692849
Arteriolar Tortuosity	21	46350065	rs7276960	C	T	0.382437	0.0033449	0.0095997	0.727524
Arteriolar Tortuosity	22	39633749	rs2267406	C	T	0.754664	0.029901	0.0108615	0.0059282
Arteriolar Width	12	6954864	rs5442	A	G	0.0663976	-0.771482	0.258462	0.0028506
Arteriolar Width	18	630788	rs12969347	A	G	0.0711683	0.0304401	0.253973	0.904603
Venular Tortuosity	3	8497234	rs115929714	A	G	0.0456747	0.0262656	0.0135224	0.0521475
Venular Tortuosity	4	184250312	rs7694290	T	C	0.352811	0.0063334	0.0057374	0.269702
Venular Tortuosity	9	100304531	rs10982622	G	A	0.470415	0.0058627	0.0055118	0.287531
Venular Tortuosity	9	125026162	rs10760220	G	A	0.414279	0.0092665	0.0056498	0.101038
Venular Tortuosity	15	63344167	rs55719615	G	A	0.30422	0.0018129	0.0060748	0.765388
Venular Tortuosity	15	77804568	rs35284122	T	G	0.338408	0.018499	0.0057676	0.0013479
Venular Tortuosity	16	51469726	rs8053277	C	T	0.705289	0.0190331	0.0060639	0.0017068
Venular Tortuosity	17	70387448	rs12603193	G	A	0.363766	0.0032984	0.0057163	0.56396
Venular Tortuosity	22	19960198	rs71313932	C	G	0.295057	0.0007817	0.0061099	0.898197
Venular Width	1	196682947	rs2274700	A	G	0.408433	-0.393923	0.219285	0.0724928
Venular Width	5	87919700	rs115456027	T	C	0.077555	1.62676	0.396708	4.19e-05
Venular Width	6	142483643	rs225647	T	A	0.757142	0.482219	0.251562	0.0553083
Venular Width	8	10634132	rs10089615	T	C	0.61804	-0.580511	0.22351	0.0094252
Venular Width	8	130183779	rs77391671	T	A	0.110513	-0.526862	0.344337	0.126062
Venular Width	10	69980221	rs10733840	G	A	0.80025	-0.169078	0.269168	0.529935
Venular Width	15	89723858	rs4932480	C	T	0.514693	0.349458	0.214344	0.103089
Venular Width	19	49215095	rs4002471	T	C	0.531792	0.462018	0.213432	0.0304577
Venular Width	20	22695089	rs7265807	T	C	0.318119	0.292409	0.233741	0.210996
Venular Width	21	39872696	rs2836445	A	G	0.383653	-0.425302	0.22095	0.0543014

## Sheet: Table E
Table E. Results of the meta-analyses of the UK Biobank and EPIC-Norfolk cohorts
Trait	Chr	Pos	SNP	Ref Allele	OtherAllele	Ref Allele Freq	Effects	SE	P.value	Nearest Gene		Legend
Arteriolar Tortuosity	1	933790	rs9442392	G	A	0.422426	0.016	0.003	4.12e-08	HES4		TOC
Arteriolar Tortuosity	1	3264190	rs2483289	A	C	0.296157	0.02	0.003	1.96e-11	PRDM16
Arteriolar Tortuosity	1	6765536	1:6765536_AT_A	AT	A	0.683085	0.018	0.003	7.85e-09	DNAJC11
Arteriolar Tortuosity	1	22271228	rs10753521	C	T	0.650581	-0.018	0.003	1.1e-09	HSPG2
Arteriolar Tortuosity	1	23446502	rs9426801	G	A	0.732957	-0.019	0.003	2.71e-09	LUZP1
Arteriolar Tortuosity	1	68314967	rs12118331	C	A	0.740221	-0.02	0.003	3.21e-10	GNG12
Arteriolar Tortuosity	1	92327707	rs17881430	G	A	0.692506	-0.028	0.003	1.59e-20	TGFBR3
Arteriolar Tortuosity	1	110619665	rs10127659	A	C	0.644609	-0.037	0.003	5.1e-36	ALX3
Arteriolar Tortuosity	1	150250534	rs10788873	T	A	0.474755	-0.043	0.003	1.18e-52	APH1A
Arteriolar Tortuosity	1	153899266	1:153899266_ATT_A	ATT	A	0.701424	-0.02	0.003	1.36e-09	GATAD2B
Arteriolar Tortuosity	1	169018902	rs3007364	G	A	0.343428	-0.018	0.003	9.17e-10	ATP1B1
Arteriolar Tortuosity	1	170379727	rs4656767	A	C	0.72709	0.02	0.003	2.94e-10	GORAB
Arteriolar Tortuosity	1	201887457	rs4950743	C	T	0.317704	-0.024	0.003	6.57e-15	LMOD1
Arteriolar Tortuosity	1	227509822	rs112208828	C	T	0.862229	-0.028	0.004	8.22e-12	CDC42BPA
Arteriolar Tortuosity	2	1568378	rs150606467	G	A	0.960174	-0.05	0.007	5.05e-12	TPO
Arteriolar Tortuosity	2	11392516	2:11392516_GA_G	GA	G	0.943602	0.055	0.006	8.86e-18	ROCK2
Arteriolar Tortuosity	2	23822075	rs143536916	C	G	0.988794	0.079	0.014	2.86e-08	KLHL29
Arteriolar Tortuosity	2	46293826	rs114948639	C	T	0.987914	0.079	0.013	2.76e-09	PRKCE
Arteriolar Tortuosity	2	54847675	rs11125543	C	A	0.41613	-0.016	0.003	3.34e-08	SPTBN1
Arteriolar Tortuosity	2	112280744	rs28701006	C	A	0.725138	0.025	0.003	2.86e-15	ANAPC1
Arteriolar Tortuosity	2	134303364	rs10170172	G	A	0.510921	-0.023	0.003	1.69e-16	NCKAP5
Arteriolar Tortuosity	2	204085635	rs12693982	C	T	0.600922	-0.016	0.003	1.74e-08	NBEAL1
Arteriolar Tortuosity	2	212031854	rs12694223	T	C	0.467612	0.022	0.003	1.6e-15	ERBB4
Arteriolar Tortuosity	2	218667372	rs3791979	T	C	0.398186	0.052	0.003	6.61e-71	TNS1
Arteriolar Tortuosity	2	242392759	rs28446330	T	C	0.896995	-0.041	0.005	1.58e-18	FARP2
Arteriolar Tortuosity	3	20162869	rs75482782	T	G	0.924016	-0.033	0.005	8.33e-10	KAT2B
Arteriolar Tortuosity	3	149500045	rs13322158	T	C	0.694011	-0.021	0.003	4.44e-12	ANKUB1
Arteriolar Tortuosity	3	192665785	rs2133868	G	T	0.993617	0.016	0.003	1.23e-08	MB21D2
Arteriolar Tortuosity	4	1797484	rs3135846	C	G	0.731045	-0.018	0.003	8.53e-09	FGFR3
Arteriolar Tortuosity	4	8275104	rs13115162	A	G	0.259885	0.034	0.003	7.57e-27	HTRA3
Arteriolar Tortuosity	4	85038025	4:85038025_CTT_C	CTT	C	0.601779	0.051	0.003	7.39e-65	NA
Arteriolar Tortuosity	4	120278100	rs11727963	G	A	0.830896	-0.06	0.004	6.99e-58	FABP2
Arteriolar Tortuosity	4	169652929	rs2047634	G	A	0.426052	-0.019	0.003	6.12e-11	PALLD
Arteriolar Tortuosity	4	186776746	rs1566354	C	T	0.770013	-0.02	0.003	2.7e-09	SORBS2
Arteriolar Tortuosity	5	1104938	rs35188965	C	T	0.415868	0.02	0.003	1.81e-12	SLC12A7
Arteriolar Tortuosity	5	52138990	rs73756267	C	T	0.748012	-0.019	0.003	6.01e-09	ITGA1
Arteriolar Tortuosity	5	63888835	rs10805388	A	C	0.703396	-0.018	0.003	2.75e-09	RGS7BP
Arteriolar Tortuosity	5	77944618	rs341924	G	T	0.496619	0.042	0.003	6.26e-51	LHFPL2
Arteriolar Tortuosity	5	89520538	rs1369113	G	A	0.118309	0.026	0.004	1.17e-09	CETN3
Arteriolar Tortuosity	5	121518309	rs9112	G	A	0.59329	0.019	0.003	7.49e-11	ZNF474
Arteriolar Tortuosity	5	132127821	rs171770	C	A	0.883149	1899-12-29 23:22:33	00:05:45.600000	00:00:00	2021-09-08
Arteriolar Tortuosity	5	149509446	rs41287110	C	T	0.974488	0.057	0.009	1.64e-10	PDGFRB
Arteriolar Tortuosity	6	1385814	rs9405472	C	A	0.427524	-0.033	0.003	9.5e-28	TRIM15
Arteriolar Tortuosity	6	12476696	rs9296392	A	C	0.830994	0.036	0.004	3.3e-22	EDN1
Arteriolar Tortuosity	6	31454844	rs17193633	T	C	0.956835	-0.049	0.008	3.21e-09	NFKBIL1
Arteriolar Tortuosity	6	39888734	rs71571397	G	C	0.938604	-0.054	0.006	3.85e-20	MOCS1
Arteriolar Tortuosity	6	140966145	rs1414829	C	T	0.427645	-0.017	0.003	2.33e-09	NA
Arteriolar Tortuosity	6	150980287	6:150980287_CTT_C	CTT	C	0.939474	0.056	0.006	1.62e-18	PLEKHG1
Arteriolar Tortuosity	7	45229316	rs10951805	G	A	0.784967	0.024	0.003	1.3e-12	RAMP3
Arteriolar Tortuosity	7	91017896	rs7807514	C	T	0.438544	0.016	0.003	1.51e-08	FZD1
Arteriolar Tortuosity	7	139332000	rs1464798	G	A	0.552565	-0.016	0.003	3.22e-08	HIPK2
Arteriolar Tortuosity	8	18941575	rs9657494	G	A	0.506005	0.017	0.003	2.47e-09	PSD3
Arteriolar Tortuosity	8	25568895	rs2874535	T	C	0.394147	0.016	0.003	1.86e-08	PPP2R2A
Arteriolar Tortuosity	8	38424111	rs10958732	T	C	0.897765	0.05	0.005	3.47e-27	RNF5P1
Arteriolar Tortuosity	8	55330814	rs13258851	G	A	0.89778	-0.026	0.005	1.9e-08	SOX17
Arteriolar Tortuosity	8	109156782	rs407432	T	A	0.767	-0.021	0.003	1.29e-10	EIF3E
Arteriolar Tortuosity	9	94251806	rs62562579	G	A	0.702107	0.027	0.003	2.96e-18	NFIL3
Arteriolar Tortuosity	9	130334178	rs4240418	C	T	0.288317	0.025	0.003	1.39e-15	FAM129B
Arteriolar Tortuosity	9	136155000	rs635634	C	T	0.813364	-0.029	0.004	4.53e-16	ABO
Arteriolar Tortuosity	9	140500443	9:140500443_G_A	G	A	0.97494	-0.064	0.01	3.28e-10	ARRDC1
Arteriolar Tortuosity	10	65301725	rs7897379	T	C	0.517364	-0.019	0.003	2.46e-11	REEP3
Arteriolar Tortuosity	10	105599770	rs11191822	T	G	0.642316	0.018	0.003	1.14e-09	SH3PXD2A
Arteriolar Tortuosity	10	119391213	rs181676	G	A	0.70705	-0.024	0.003	3.28e-14	EMX2
Arteriolar Tortuosity	11	8890924	rs11042104	G	C	0.750551	0.022	0.003	1.04e-11	ST5
Arteriolar Tortuosity	11	45357533	rs7925771	T	C	0.164154	0.021	0.004	3.9e-08	SYT13
Arteriolar Tortuosity	11	62276715	11:62276715_CA_C	CA	C	0.971077	-0.059	0.009	3.26e-11	AHNAK
Arteriolar Tortuosity	11	70004367	rs12295837	G	A	0.732781	-0.036	0.003	1.49e-29	ANO1
Arteriolar Tortuosity	12	20589390	rs11045245	A	G	0.61865	-0.048	0.003	9.91e-61	PDE3A
Arteriolar Tortuosity	12	80088578	rs12827748	T	C	0.306621	0.033	0.003	1.31e-27	PAWR
Arteriolar Tortuosity	12	116863148	rs7315837	G	A	0.209064	0.021	0.003	6.19e-10	MED13L
Arteriolar Tortuosity	13	28968468	rs1555641	G	A	0.69782	-0.034	0.003	6.38e-29	FLT1
Arteriolar Tortuosity	13	47166195	rs1123028	C	T	0.249297	-0.03	0.003	3.45e-20	LRCH1
Arteriolar Tortuosity	13	72347501	rs932768	T	C	0.616946	0.018	0.003	4.64e-10	DACH1
Arteriolar Tortuosity	13	111085411	rs9559797	G	C	0.426167	0.075	0.003	6.76e-151	COL4A2
Arteriolar Tortuosity	14	61072875	rs10483727	T	C	0.387221	0.019	0.003	1.57e-11	SIX1
Arteriolar Tortuosity	14	65212845	rs41307086	T	C	0.84728	0.022	0.004	3.63e-08	PLEKHG3
Arteriolar Tortuosity	14	76109364	rs7140617	C	A	0.251342	0.021	0.003	4.66e-11	FLVCR2
Arteriolar Tortuosity	14	105954705	rs55633823	C	T	0.747377	-0.048	0.003	2.18e-49	CRIP1
Arteriolar Tortuosity	15	28365618	rs12913832	A	G	0.218995	-0.021	0.003	4.15e-10	HERC2
Arteriolar Tortuosity	15	52106301	rs2009972	G	A	0.55645	-0.026	0.003	2.47e-20	TMOD2
Arteriolar Tortuosity	15	56305252	rs62046386	G	A	0.935749	0.041	0.006	4.74e-13	NEDD4
Arteriolar Tortuosity	15	75065644	rs4886410	G	C	0.321876	0.046	0.003	3.85e-52	CSK
Arteriolar Tortuosity	16	14085006	rs9931041	C	T	0.201907	-0.022	0.004	7.54e-10	ERCC4
Arteriolar Tortuosity	16	75475692	rs7184596	A	G	0.800695	0.023	0.004	3.64e-11	CFDP1
Arteriolar Tortuosity	16	86385102	rs139379798	C	A	0.986876	0.078	0.013	9.3e-10	FOXF1
Arteriolar Tortuosity	17	1982772	17:1982772_CA_C	CA	C	0.371911	-0.027	0.003	2.93e-19	SMG6
Arteriolar Tortuosity	17	56786453	17:56786453_CT_C	CT	C	0.662694	0.025	0.003	5.83e-15	RAD51C
Arteriolar Tortuosity	17	64124768	rs9897921	A	C	0.895293	-0.027	0.005	8.21e-09	CEP112
Arteriolar Tortuosity	17	68323746	rs16975575	T	G	0.774319	0.047	0.003	1.99e-45	KCNJ2
Arteriolar Tortuosity	17	74674857	rs9900613	C	T	0.570605	-0.02	0.003	2.41e-12	MXRA7
Arteriolar Tortuosity	19	14589068	rs76301301	T	G	0.81874	-0.022	0.004	1.16e-09	GIPC1
Arteriolar Tortuosity	19	39150235	rs10415219	A	G	0.513523	0.044	0.003	3.28e-54	ACTN4
Arteriolar Tortuosity	19	46203916	rs11673709	A	C	0.848634	-0.03	0.004	1.12e-13	QPCTL
Arteriolar Tortuosity	19	50194392	19:50194392_CGA_C	CGA	C	0.993759	-0.106	0.019	1.77e-08	CPT1C
Arteriolar Tortuosity	20	33752110	rs143373163	G	T	0.913868	0.033	0.005	4.26e-11	EDEM2
Arteriolar Tortuosity	22	18322333	22:18322333_CTT_C	CTT	C	0.667047	-0.02	0.003	7.42e-10	MICAL3
Arteriolar Tortuosity	22	39633749	rs2267406	T	C	0.256012	-0.034	0.003	6.72e-26	PDGFB
Arteriolar Tortuosity	22	40881793	rs139062	T	C	0.61662	0.016	0.003	4.18e-08	MKL1
Arteriolar Width	12	6954864	rs5442	G	A	0.929117	0.745	0.088	2.13e-17	GNB3
Arteriolar Width	18	630833	rs9964020	C	T	0.926997	0.485	0.088	3.34e-08	CLUL1
Arteriolar Width	22	41847334	rs147859819	G	A	0.989873	-1.256	0.228	3.43e-08	TOB2
Venular Tortuosity	1	6708246	rs12137032	G	A	0.653545	0.013	0.002	5.95e-12	DNAJC11
Venular Tortuosity	1	183105324	rs2296297	C	T	0.438237	-0.011	0.002	4.52e-10	LAMC1
Venular Tortuosity	2	134274625	rs1966628	C	T	0.602281	0.014	0.002	2.46e-14	NCKAP5
Venular Tortuosity	2	218674697	rs918949	C	T	0.401161	0.02	0.002	6.17e-28	TNS1
Venular Tortuosity	2	239779504	2:239779504_CCACA_C	CCACA	C	0.892789	0.019	0.003	2.51e-08	TWIST2
Venular Tortuosity	2	242392759	rs28446330	T	C	0.896995	-0.02	0.003	1.6e-12	FARP2
Venular Tortuosity	3	8497234	rs115929714	G	A	0.948795	-0.031	0.004	2.1e-14	LMCD1
Venular Tortuosity	4	120073069	rs72673752	G	A	0.987479	-0.044	0.008	3.99e-08	MYOZ2
Venular Tortuosity	4	146891096	rs7669726	T	C	0.573539	-0.012	0.002	1.82e-11	ZNF827
Venular Tortuosity	5	77987524	rs784420	A	G	0.715425	-0.017	0.002	3.7e-19	LHFPL2
Venular Tortuosity	6	151068986	rs72570348	C	T	0.900222	0.016	0.003	3.45e-08	PLEKHG1
Venular Tortuosity	7	96411753	rs187691758	A	G	0.994301	-0.192	0.012	7.47e-56	SHFM1
Venular Tortuosity	8	109142806	rs418882	G	A	0.742829	-0.012	0.002	3.04e-09	RSPO2
Venular Tortuosity	9	100304531	rs10982622	A	G	0.531446	-0.01	0.002	1.47e-08	TMOD1
Venular Tortuosity	9	125026162	rs10760220	A	G	0.580189	-0.012	0.002	7.89e-12	RBM18
Venular Tortuosity	9	130330036	rs2249101	A	G	0.286221	0.015	0.002	1.62e-15	FAM129B
Venular Tortuosity	12	80048478	rs8176822	C	T	0.301897	0.012	0.002	1.95e-10	PAWR
Venular Tortuosity	13	98554939	rs112142832	A	T	0.990295	-0.05	0.009	1.67e-08	IPO5
Venular Tortuosity	15	77803615	rs8040702	G	A	0.666212	-0.015	0.002	1.26e-15	HMG20A
Venular Tortuosity	16	51469726	rs8053277	T	C	0.301696	-0.014	0.002	4.78e-13	NA
Venular Tortuosity	17	75373170	rs34596832	C	T	0.517511	1899-12-29 23:42:43	00:02:52.800000	00:00:00	SEP9
Venular Tortuosity	19	39150235	rs10415219	A	G	0.513523	0.044	0.002	7.68e-140	ACTN4
Venular Tortuosity	21	33782741	rs16989381	A	G	0.883995	-0.015	0.003	2.22e-08	EVA1C
Venular Width	1	92274109	rs61781098	G	A	0.931087	-0.787	0.141	2.18e-08	TGFBR3
Venular Width	1	196679455	rs10737680	A	C	0.597437	0.481	0.073	4.36e-11	CFH
Venular Width	2	169714893	rs569997	T	C	0.529504	-0.431	0.072	1.95e-09	NOSTRIN
Venular Width	5	31865099	rs62361597	C	T	0.944203	-0.953	0.167	1.07e-08	PDZD2
Venular Width	5	87919700	rs115456027	C	T	0.923242	-1.132	0.135	5.36e-17	MEF2C
Venular Width	6	142483643	rs225647	A	T	0.241521	-0.764	0.084	6.66e-20	VTA1
Venular Width	8	10635141	rs6601523	G	A	0.402695	0.544	0.073	9.6e-14	SOX7
Venular Width	8	142161957	rs170089	C	T	0.901105	0.667	0.12	2.58e-08	DENND3
Venular Width	10	69981436	rs2394459	A	G	0.193595	0.557	0.091	8.63e-10	MYPN
Venular Width	10	71099109	rs72805692	A	G	0.882402	-0.632	0.111	1.39e-08	HK1
Venular Width	10	94490174	rs2488075	T	C	0.503247	0.398	0.072	2.61e-08	HHEX
Venular Width	12	111884608	rs3184504	T	C	0.482395	0.413	0.072	8.73e-09	SH2B3
Venular Width	13	28996455	13:28996455_TC_T	TC	T	0.255763	0.582	0.088	3.3e-11	FLT1
Venular Width	15	54000973	rs690054	C	T	0.514486	0.511	0.072	1.08e-12	WDR72
Venular Width	15	89723858	rs4932480	T	C	0.487185	-0.488	0.072	1.26e-11	ABHD2
Venular Width	19	39143884	rs12460849	G	A	0.507641	-0.509	0.072	1.38e-12	ACTN4
Venular Width	19	49229323	rs479486	G	A	0.453455	-0.664	0.072	2.81e-20	RASIP1
Venular Width	20	22700432	rs62203753	G	C	0.686094	-0.452	0.077	4.79e-09	FOXA2
Venular Width	21	30228294	rs146690063	G	A	0.97268	1.27	0.229	2.85e-08	N6AMT1
Venular Width	21	39872696	rs2836445	G	A	0.615857	0.432	0.074	4.41e-09	ERG

## Sheet: Table F
Table F. Known loci replicated in trans-ancestry analysis combining Asian, African and European analysis																						Legend
Trait	Variant	Chr	Pos	Locus Name	EA/NEA	European					African					South-Asian						TOC
						N	EAF	Effects	SE	P.value	N	EAF	Effects	SE	P.value	N	EAF	Effects	SE	P.value
Arteriolar Tortuosity	rs2742672	1	3038623	PRDM16	A/G	52798	0.631937	0.0154833	0.00302799	2.4e-08	1288	0.0951087	0.0245063	0.0669021	0.714201	933	0.441586	0.0121113	0.0459418	0.792129
Arteriolar Tortuosity	1:6765536	1	6765536	DNAJC11	AT/A	52798	0.683085	0.0181652	0.00314736	1.5e-09	1288	0.84045	0.00923076	0.0540813	0.8645	933	0.557878	-0.100185	0.0457239	0.0286959
Arteriolar Tortuosity	rs9426677	1	22249836	HSPG2	C/T	52798	0.75931	-0.0199019	0.00341824	1.2e-09	1288	0.835016	-0.126275	0.0508866	0.0132115	933	0.697749	-0.00667486	0.0500878	0.894014
Arteriolar Tortuosity	1:68257907	1	68257907	GNG12	ATGT/A	52798	0.75725	-0.0212348	0.00343607	5.2e-10	1288	0.802019	0.0271793	0.0479649	0.571052	933	0.803323	0.00895665	0.0588025	0.87897
Arteriolar Tortuosity	rs17881430	1	92327707	TGFBR3	G/A	52798	0.692506	-0.0292289	0.00316636	1.3e-20	1288	0.911103	-0.0334951	0.068828	0.626591	933	0.748124	-0.0271881	0.0532517	0.609783
Arteriolar Tortuosity	rs35129491	1	110633706	ALX3	A/AT	52798	0.645016	-0.0352705	0.00305156	1.4e-32	1288	0.831522	-0.0228484	0.0515092	0.657422	933	0.797428	-0.0635531	0.057219	0.266989
Arteriolar Tortuosity	1:150341917	1	150341917	RPRD2	ATTTTTTTTTTTTTTTTTT/A	52798	0.686659	0.0377322	0.00323136	8e-33	1288	0.451863	0.0045343	0.0390637	0.907612	933	0.752947	0.0695142	0.0550648	0.207123
Arteriolar Tortuosity	1:153899266	1	153899266	GATAD2B	ATT/A	52798	0.701424	-0.0195514	0.00322598	4.2e-08	1288	0.749224	0.00604461	0.0442189	0.891292	933	0.677385	-0.0932239	0.047581	0.0503833
Arteriolar Tortuosity	rs1200099	1	169049738	ATP1B1	C/T	52798	0.656293	0.0183838	0.00308988	2.3e-09	1288	0.978649	-0.0236718	0.13717	0.863015	933	0.844051	0.0213686	0.062947	0.734334
Arteriolar Tortuosity	1:170392984	1	170392984	GORAB	AC/A	52798	0.729208	0.0208481	0.0032987	8.3e-11	1288	0.96972	0.131528	0.115508	0.255044	933	0.747588	0.00267721	0.0520538	0.958993
Arteriolar Tortuosity	rs59587284	1	183585401	ARPC5	T/C	52798	0.759792	-0.0215411	0.00383793	1.6e-08	1288	0.71972	0.0133558	0.0419424	0.750209	933	0.825831	-0.0619581	0.0612988	0.3124
Arteriolar Tortuosity	1:201886769	1	201886769	LMOD1	TA/T	52798	0.66962	0.0228153	0.00310205	9.5e-15	1288	0.882764	0.087015	0.0599762	0.147074	933	0.728296	-0.0105881	0.0524907	0.840185
Arteriolar Tortuosity	rs776003769	1	227501550	CDC42BPA	AAC/A	52798	0.86069	-0.0287869	0.00423292	7.5e-13	1288	0.745342	0.0723914	0.0450298	0.108163	933	0.944802	-0.163816	0.0988682	0.097879
Arteriolar Tortuosity	rs150606467	2	1568378	TPO	G/A	52798	0.960174	-0.0511191	0.00764576	5e-12	1288	0.996894	-0.316064	0.353091	0.370884	933	0.984995	-0.0937872	0.191037	0.623588
Arteriolar Tortuosity	rs146026436	2	11343598	ROCK2	C/CT	52798	0.953261	0.0600334	0.00698818	4.1e-20	1288	--	--	--	--	933	--	--	--	--
Arteriolar Tortuosity	rs114948639	2	46293826	PRKCE	C/T	52798	0.987914	0.0819281	0.0137422	6.7e-10	1288	--	--	--	--	933	0.994641	-0.0139836	0.316885	0.964812
Arteriolar Tortuosity	rs145242747	2	112268784	ANAPC1	C/T	52798	0.724502	0.0251942	0.00328189	1.6e-16	1288	0.943711	0.135204	0.0857662	0.115177	933	0.61254	-0.00139318	0.0460514	0.975872
Arteriolar Tortuosity	rs1966628	2	134274625	NCKAP5	C/T	52798	0.602281	0.0209513	0.00298941	4.5e-14	1288	0.776786	0.0139899	0.0474379	0.76811	933	0.558414	0.0464861	0.046235	0.314954
Arteriolar Tortuosity	rs200523246	2	212038434	ERBB4	AT/A	52798	0.645516	-0.0210043	0.00309093	1.8e-11	1288	0.918867	0.0763927	0.0711782	0.283358	933	0.650054	-0.0909901	0.0497438	0.0676975
Arteriolar Tortuosity	rs3796028	2	218695102	TNS1	G/A	52798	0.645848	-0.0487527	0.00305572	2.1e-62	1288	0.67896	-0.0833413	0.0431506	0.0536543	933	0.65702	-0.0111901	0.0477231	0.814665
Arteriolar Tortuosity	rs28446330	2	242392759	FARP2	T/C	52798	0.896995	-0.039465	0.00483239	4.3e-16	1288	0.861025	-0.00837159	0.0570326	0.883324	933	0.949625	-0.0178177	0.105825	0.86633
Arteriolar Tortuosity	rs75482782	3	20162869	KAT2B	T/G	52798	0.924016	-0.0345692	0.00558363	7.4e-10	1288	0.993789	-0.209483	0.250198	0.402598	933	0.977492	0.19638	0.153928	0.202352
Arteriolar Tortuosity	rs72970952	3	123761800	ROPN1	A/C	52798	0.865362	0.0227072	0.00431419	2.3e-09	1288	0.887811	0.00103868	0.0604627	0.986297	933	0.758307	-0.00507939	0.0552269	0.926739
Arteriolar Tortuosity	rs2130320	3	149548794	RNF13	G/A	52798	0.677285	-0.0216362	0.0031345	2.1e-11	1288	0.762811	-0.0311417	0.044731	0.48643	933	0.64791	0.00313676	0.0483911	0.948331
Arteriolar Tortuosity	rs6833227	4	8270320	HTRA3	G/T	52798	0.717439	0.0325937	0.00327667	4e-25	1288	0.697205	0.0610869	0.0415692	0.141938	933	0.516613	0.046953	0.0456784	0.304265
Arteriolar Tortuosity	rs1950127	4	85029914	--	G/A	52798	0.603383	0.0508878	0.00299119	1.8e-68	1288	0.23486	0.050877	0.046217	0.27118	933	0.527331	0.0617519	0.0465338	0.184828
Arteriolar Tortuosity	rs62320736	4	120278368	FABP2	C/G	52798	0.830686	-0.05935	0.00389385	3.1e-55	1288	0.795807	0.0334384	0.0476684	0.483132	933	0.841908	-0.0321106	0.062127	0.605382
Arteriolar Tortuosity	rs1566354	4	186776746	SORBS2	C/T	52798	0.770013	-0.0196903	0.00348761	1.2e-09	1288	0.984084	-0.258747	0.15823	0.102242	933	0.704716	-0.0493346	0.0500052	0.324104
Arteriolar Tortuosity	rs6883753	5	1111657	SLC12A7	G/A	52798	0.659637	-0.0172085	0.00313944	1.2e-08	1288	0.598602	0.0217355	0.0402357	0.589151	933	0.539657	-0.0376367	0.045949	0.412943
Arteriolar Tortuosity	rs6867399	5	52135543	ITGA1	C/A	52798	0.721314	-0.0187566	0.00337205	1.3e-08	1288	0.875388	-0.0160592	0.0587647	0.784682	933	0.811897	-0.0434874	0.0592585	0.463222
Arteriolar Tortuosity	rs10805388	5	63888835	RGS7BP	A/C	52798	0.703396	-0.0194663	0.00320787	7.8e-10	1288	0.762811	-0.0215344	0.0456568	0.637251	933	0.620579	-0.00472376	0.0474511	0.920723
Arteriolar Tortuosity	rs784420	5	77987524	LHFPL2	A/G	52798	0.715425	-0.0430688	0.00324112	4.1e-42	1288	0.978649	-0.145478	0.135541	0.283333	933	0.724544	0.12072	0.0517706	0.0199253
Arteriolar Tortuosity	rs1019992	5	89523523	CETN3	T/C	52798	0.881768	-0.0275412	0.00454743	1e-09	1288	0.495342	0.0110584	0.0389301	0.776411	933	0.837621	0.0399339	0.0620524	0.520027
Arteriolar Tortuosity	rs42403	5	132093994	SEPTIN8	C/T	52798	0.885849	-0.0263183	0.0046309	1.3e-09	1288	0.572981	0.0238077	0.0393587	0.54536	933	0.866024	-0.0385652	0.0668357	0.56407
Arteriolar Tortuosity	rs41287110	5	149509446	PDGFRB	C/T	52798	0.974488	0.0603698	0.00928564	2e-11	1288	0.998447	0.108468	0.49609	0.826961	933	0.993569	0.0307206	0.289773	0.915593
Arteriolar Tortuosity	rs11243209	6	844122	GABBR1	G/A	52798	0.743145	-0.0321303	0.00341876	3.2e-22	1288	0.675078	-0.0337455	0.0418186	0.419846	933	0.745445	0.052377	0.0528298	0.321737
Arteriolar Tortuosity	rs11752007	6	7242605	RREB1	T/C	52798	0.87362	-0.0241073	0.0044421	1.1e-08	1288	0.992236	0.300025	0.224054	0.180786	933	0.948017	0.106323	0.105794	0.315159
Arteriolar Tortuosity	rs9296392	6	12476696	EDN1	A/C	52798	0.830994	0.0366341	0.00392054	1.3e-24	1288	0.468556	-0.0701507	0.0394296	0.0754557	933	0.662915	0.0373988	0.0498888	0.453662
Arteriolar Tortuosity	rs751513188	6	31100331	DPCR1	A/AAATA	52798	0.865459	0.0253849	0.00441269	3.7e-09	1288	--	--	--	--	933	--	--	--	--
Arteriolar Tortuosity	rs71571397	6	39888734	MOCS1	G/C	52798	0.938604	-0.0536045	0.00615121	1.6e-18	1288	0.936335	0.0173629	0.0793303	0.826788	933	0.908896	0.026964	0.079563	0.734762
Arteriolar Tortuosity	6:141666940	6	141666940	--	TTTC/T	52798	0.777036	0.0205092	0.00354736	8e-10	1288	0.903339	-0.0112769	0.0656178	0.863577	933	0.75134	-0.0223982	0.0537569	0.677026
Arteriolar Tortuosity	6:150980287	6	150980287	PLEKHG1	CTT/C	52798	0.939474	0.0560452	0.0063825	1.7e-21	1288	0.878882	0.0924195	0.06001	0.123792	933	0.835477	0.201482	0.0615067	0.00109313
Arteriolar Tortuosity	rs10951805	7	45229316	RAMP3	G/A	52798	0.784967	0.0246697	0.00358243	3.2e-14	1288	0.39441	0.162813	0.0400622	5.11907e-05	933	0.77224	-0.0465579	0.0543062	0.39149
Arteriolar Tortuosity	rs771385814	8	26004921	PPP2R2A	CAA/C	52798	0.819948	-0.0175291	0.0038551	4.7e-08	1288	0.684006	-0.0233153	0.0418207	0.577279	933	0.786174	0.000542291	0.0554087	0.992193
Arteriolar Tortuosity	rs10958733	8	38424123	RNF5P1	T/C	52798	0.897648	0.0482905	0.0048281	2.1e-26	1288	0.60559	0.0572518	0.0393657	0.146093	933	0.8194	0.200031	0.0607942	0.00103887
Arteriolar Tortuosity	rs13258851	8	55330814	SOX17	G/A	52798	0.89778	-0.0265216	0.00485722	1.4e-09	1288	0.934394	-0.115972	0.0788682	0.141687	933	0.725616	-0.0452669	0.0511862	0.376735
Arteriolar Tortuosity	rs34841339	8	73975469	SBSPON	C/CT	52798	0.925215	0.033033	0.00572741	4.9e-08	1288	--	--	--	--	933	--	--	--	--
Arteriolar Tortuosity	rs396498	8	109156783	EIF3E	C/A	52798	0.767025	-0.0237747	0.00348543	1.6e-11	1288	0.940994	0.0903461	0.0827893	0.275357	933	0.766345	-0.0482379	0.054459	0.375976
Arteriolar Tortuosity	rs62562579	9	94251806	NFIL3	G/A	52798	0.702107	0.0267611	0.00321994	6.1e-19	1288	0.123447	-0.0102938	0.0603609	0.864614	933	0.610932	0.0221167	0.0466146	0.635285
Arteriolar Tortuosity	rs576435438	9	130325805	FAM129B	A/AT	52798	0.730455	-0.0268724	0.0033831	4e-16	1288	0.73059	-0.0604323	0.044722	0.176843	933	0.745981	-0.0417622	0.0531431	0.432161
Arteriolar Tortuosity	rs532436	9	136149830	ABO	G/A	52798	0.812785	-0.0290762	0.00377973	1.7e-16	1288	0.90722	-0.0426596	0.0652522	0.513381	933	0.849946	-0.0211456	0.0651391	0.745541
Arteriolar Tortuosity	9:140500443	9	140500443	ARRDC1	G/A	52798	0.97494	-0.0635614	0.010113	3.9e-10	1288	0.999224	-2.50168	0.697514	0.000347752	933	0.972669	-0.448885	0.143137	0.0017668
Arteriolar Tortuosity	rs11258750	10	13998852	FRMD4A	T/C	52798	0.71162	0.017397	0.00324991	5.3e-09	1288	0.946817	-0.0701343	0.0869845	0.420229	933	0.830118	0.0863444	0.0613595	0.15971
Arteriolar Tortuosity	rs10883922	10	105595430	SH3PXD2A	C/G	52798	0.646766	0.0190921	0.00307374	5.1e-11	1288	0.897516	-0.101387	0.0633899	0.109977	933	0.487674	0.0524733	0.0455267	0.249381
Arteriolar Tortuosity	rs181678	10	119395398	EMX2	T/A	52798	0.710762	-0.0242686	0.00327681	2.3e-14	1288	0.637811	-0.077945	0.0408093	0.0563597	933	0.486066	-0.0584679	0.0452597	0.196741
Arteriolar Tortuosity	rs11596263	10	129767088	PTPRE	C/T	52798	0.978162	0.0483443	0.0100472	3.2e-08	1288	0.998447	0.129821	0.495027	0.793171	933	0.998392	0.885723	0.572542	0.122208
Arteriolar Tortuosity	rs11042104	11	8890924	ST5	G/C	52798	0.750551	0.021947	0.00339285	1.6e-09	1288	0.748059	-0.0620696	0.045818	0.175754	933	0.57074	-0.0547794	0.0457434	0.231406
Arteriolar Tortuosity	rs145590149	11	62303555	AHNAK	T/TCTC	52798	0.971922	-0.0604165	0.00892816	2.6e-13	1288	0.745342	-0.00834156	0.0438384	0.84912	933	0.966238	-0.120542	0.127468	0.344567
Arteriolar Tortuosity	rs35760498	11	69989135	ANO1	A/G	52798	0.735458	-0.0368615	0.00332531	6.5e-31	1288	0.975544	-0.176786	0.124521	0.15593	933	0.814041	-0.0512751	0.0580868	0.377612
Arteriolar Tortuosity	rs11045245	12	20589390	PDE3A	A/G	52798	0.61865	-0.0488082	0.00303208	1.3e-64	1288	0.965062	-0.0293832	0.107922	0.785464	933	0.465702	-0.0548625	0.0468589	0.241982
Arteriolar Tortuosity	rs10861997	12	79967246	PAWR	G/A	52798	0.858055	-0.0392846	0.0042238	1.4e-22	1288	0.100155	-0.0326582	0.0688393	0.635287	933	0.801179	-0.157855	0.0562468	0.00511467
Arteriolar Tortuosity	rs17086617	13	28962686	FLT1	T/C	52798	0.701902	-0.0353776	0.00321575	1.2e-29	1288	0.832298	-0.0685506	0.0526452	0.19311	933	0.748124	-0.0894952	0.0524869	0.0885143
Arteriolar Tortuosity	rs7333406	13	47299045	LRCH1	T/G	52798	0.794213	0.0246002	0.00365321	2.7e-11	1288	0.661879	0.0621753	0.0416086	0.135348	933	0.79314	0.0629357	0.0568687	0.26872
Arteriolar Tortuosity	rs932768	13	72347501	DACH1	T/C	52798	0.616946	0.0168172	0.00303188	2.2e-09	1288	0.541149	0.00600935	0.0399995	0.880602	933	0.446409	0.0436229	0.0463424	0.34679
Arteriolar Tortuosity	rs35131825	13	111104752	COL4A2	G/A	52798	0.608258	-0.0630678	0.00302218	2e-108	1288	0.814053	-0.123123	0.0494678	0.0129392	933	0.609861	-0.158635	0.046947	0.000758041
Arteriolar Tortuosity	rs4436712	14	60808002	PPM1A	G/T	52798	0.614036	-0.0180442	0.00304382	3.2e-10	1288	0.0473602	0.0659824	0.0963573	0.493615	933	0.442658	-0.109422	0.0463521	0.0184499
Arteriolar Tortuosity	rs556305129	14	65190211	PLEKHG3	A/AAG	52798	0.860762	0.0227643	0.00429468	2.9e-08	1288	0.775621	-0.00781784	0.0464394	0.866338	933	0.830654	-0.0942722	0.0615682	0.126069
Arteriolar Tortuosity	rs2241442	14	76186376	TTLL5	A/G	52798	0.747122	-0.0208383	0.00339109	6.2e-09	1288	0.39868	-0.0151926	0.0395277	0.700782	933	0.691854	-0.0313381	0.0499822	0.530824
Arteriolar Tortuosity	rs56130943	14	105906522	MTA1	A/C	52798	0.766167	-0.0499252	0.00355591	1.2e-46	1288	0.985637	-0.348526	0.164597	0.0344154	933	0.891747	-0.152096	0.0740613	0.0402919
Arteriolar Tortuosity	rs536034915	15	52059228	TMOD2	A/AT	52798	0.604628	-0.02704	0.00309257	8.1e-19	1288	0.642857	-0.050123	0.0399532	0.209875	933	0.6806	-0.0308773	0.0488458	0.527453
Arteriolar Tortuosity	rs62046386	15	56305252	NEDD4	G/A	52798	0.935749	0.0437272	0.00599536	2.8e-14	1288	0.897127	0.0441422	0.0649683	0.496981	933	0.894962	0.0806941	0.0754923	0.285393
Arteriolar Tortuosity	rs8037798	15	75240030	COX5A	T/G	52798	0.768018	-0.0402361	0.0035077	2e-32	1288	0.509705	0.00095195	0.0395466	0.980799	933	0.790997	-0.0132876	0.0567318	0.814869
Arteriolar Tortuosity	rs12926918	16	14097785	ERCC4	T/C	52798	0.780312	0.0212037	0.00354957	3.2e-10	1288	0.493012	0.00553882	0.0381473	0.88458	933	0.914791	0.0588102	0.0838931	0.483472
Arteriolar Tortuosity	rs12918234	16	75508453	CHST6	C/T	52798	0.807041	0.0251099	0.003754	5.9e-12	1288	0.92896	0.094501	0.0772691	0.221551	933	0.827438	0.0922059	0.0603181	0.126693
Arteriolar Tortuosity	rs5020073	16	86386971	FOXF1	A/C	52798	0.849265	0.0254024	0.00417312	5.4e-09	1288	0.756988	-0.0334247	0.0445187	0.452911	933	0.852626	-0.0339935	0.0668706	0.611331
Arteriolar Tortuosity	rs216215	17	2140668	SMG6	T/C	52798	0.717062	0.025794	0.00326633	5.3e-16	1288	0.809783	0.00547743	0.0500358	0.912847	933	0.617363	0.0497344	0.0481399	0.301818
Arteriolar Tortuosity	17:56786453	17	56786453	RAD51C	CT/C	52798	0.662694	0.0250126	0.00320364	2.2e-15	1288	0.381988	-0.0327766	0.0395226	0.407083	933	0.569668	-0.0119024	0.0463437	0.797368
Arteriolar Tortuosity	rs9897921	17	64124768	CEP112	A/C	52798	0.895293	-0.0266211	0.00483071	1.9e-09	1288	0.649457	-0.0950969	0.0414819	0.0220397	933	0.933012	0.0157213	0.0891242	0.86002
Arteriolar Tortuosity	rs34741950	17	68335967	KCNJ2	A/G	52798	0.778309	0.0483675	0.00353671	1.2e-47	1288	0.974379	-0.0985619	0.120989	0.415433	933	0.844587	0.106751	0.0626433	0.0886976
Arteriolar Tortuosity	rs1436138	17	75316880	SEPTIN9	A/G	52798	0.64015	0.0184894	0.0030626	5.3e-10	1288	0.44604	0.0906537	0.0393544	0.0214101	933	0.612004	-0.0106058	0.0455996	0.816135
Arteriolar Tortuosity	rs11662380	18	20638059	RBBP8	C/T	52798	0.787298	0.0190967	0.00364139	7.6e-09	1288	0.977873	0.141326	0.134229	0.292601	933	0.866024	-0.0329562	0.0672989	0.624464
Arteriolar Tortuosity	rs76301301	19	14589068	GIPC1	T/G	52798	0.81874	-0.0227292	0.00384371	2.3e-08	1288	0.986413	0.190264	0.170584	0.264903	933	0.92015	0.0684936	0.0852523	0.421938
Arteriolar Tortuosity	rs62119115	19	39210593	ACTN4	G/A	52798	0.757548	-0.0298121	0.00343125	1.6e-19	1288	0.88587	-0.0891023	0.0606155	0.14182	933	0.728832	-0.0619263	0.0517296	0.23157
Arteriolar Tortuosity	rs11673709	19	46203916	QPCTL	A/C	52798	0.848634	-0.0302455	0.0041945	1.7e-13	1288	0.992236	-0.167929	0.224197	0.45398	933	0.914791	-0.00509435	0.0818873	0.950408
Arteriolar Tortuosity	rs143373163	20	33752110	EDEM2	G/T	52798	0.913868	0.0327826	0.00526347	2.6e-10	1288	0.909938	0.00705982	0.0686866	0.918151	933	0.825831	0.0427618	0.0566415	0.450469
Arteriolar Tortuosity	22:18322333	22	18322333	MICAL3	CTT/C	52798	0.667047	-0.0194679	0.00316193	1.9e-09	1288	0.495342	0.000197324	0.0391165	0.995976	933	0.762594	0.0171958	0.0529241	0.74532
Arteriolar Tortuosity	22:38180407	22	38180407	TRIOBP	CAA/C	52798	0.678584	0.0162683	0.00315731	2e-08	1288	0.604814	0.0725672	0.0402516	0.0716498	933	0.536442	0.0684618	0.0474263	0.149209
Arteriolar Tortuosity	rs77516118	22	39647168	PDGFB	T/C	52798	0.744201	0.0334888	0.00338492	1.9e-23	1288	0.786879	0.0930611	0.0461598	0.0440027	933	0.824759	0.162185	0.0612632	0.00825157
Arteriolar Tortuosity	rs139065	22	40896670	MKL1	C/A	52798	0.614992	0.0165193	0.00304515	3.5e-09	1288	0.794643	0.00026482	0.0478389	0.995584	933	0.728832	-0.0102815	0.0518793	0.842948
Arteriolar Width	rs5442	12	6954864	GNB3	G/A	52798	0.929117	0.74166	0.0933518	1.9e-15	1288	0.997671	-0.49654	0.414892	0.23161	933	0.984459	-0.111109	0.176083	0.528197
Arteriolar Width	rs12969347	18	630788	CLUL1	G/A	52798	0.927524	0.55464	0.0938345	3.3e-09	1288	0.824146	-0.0836088	0.053464	0.118105	933	0.835477	-0.0415116	0.0634067	0.512833
Venular Tortuosity	rs11122106	1	6681262	PHF13	A/G	52798	0.667661	0.0137247	0.00195743	1.1e-12	1288	0.673137	0.0884175	0.04199	0.0354275	933	0.541801	0.0147397	0.0468205	0.752974
Venular Tortuosity	rs532863297	1	227409303	CDC42BPA	C/CT	52798	0.797231	0.0131765	0.00237255	7.8e-09	1288	0.948758	0.0947241	0.0885428	0.284907	933	0.75134	0.0175006	0.0531326	0.741946
Venular Tortuosity	rs6430425	2	134277480	NCKAP5	C/T	52798	0.602238	0.0132281	0.00187487	2.6e-12	1288	0.774457	0.0956309	0.0477885	0.0455907	933	0.554662	0.0381607	0.0464764	0.411815
Venular Tortuosity	rs10188605	2	218694691	TNS1	A/G	52798	0.643555	-0.0147654	0.00191785	3e-14	1288	0.572593	0.00480073	0.0415701	0.908079	933	0.631833	-0.0419213	0.0475814	0.378524
Venular Tortuosity	2:239779504	2	239779504	TWIST2	CCACA/C	52798	0.892789	0.0185576	0.00333	2.9e-08	1288	0.790373	-0.0580608	0.049467	0.240723	933	0.900321	0.144352	0.0777028	0.0635249
Venular Tortuosity	rs28446330	2	242392759	FARP2	T/C	52798	0.896995	-0.0203705	0.00303091	1.6e-11	1288	0.861025	-0.0801457	0.057763	0.165535	933	0.949625	0.00984896	0.106645	0.926438
Venular Tortuosity	rs115929714	3	8497234	LMCD1	G/A	52798	0.948795	-0.0308724	0.00417159	1.4e-13	1288	0.99573	0.513298	0.304119	0.0916905	933	0.984459	-0.424081	0.189275	0.0252933
Venular Tortuosity	rs150457995	4	146962889	ZNF827	T/TTTC	52798	0.618562	-0.0109159	0.00189806	2.2e-09	1288	0.692158	-0.0831909	0.0427074	0.0516431	933	0.616827	-0.0156072	0.0465089	0.737268
Venular Tortuosity	rs168189	5	77974427	LHFPL2	C/T	52798	0.724612	-0.0187565	0.00206451	4.7e-20	1288	0.97632	-0.141422	0.131046	0.280713	933	0.734191	0.0700608	0.0529147	0.185821
Venular Tortuosity	rs2948244	7	96496658	DLX6	G/C	52798	0.657035	0.0185289	0.00193365	4.3e-23	1288	0.137811	0.0196317	0.0566434	0.72896	933	0.349411	0.0553549	0.0496985	0.265651
Venular Tortuosity	rs7034992	9	125026664	RBM18	G/A	52798	0.645	-0.0117375	0.00196482	7.1e-10	1288	0.917314	0.00159532	0.0729749	0.982562	933	0.541801	-0.0921357	0.0474891	0.0526679
Venular Tortuosity	rs576435438	9	130325805	FAM129B	A/AT	52798	0.730455	-0.0171649	0.0021105	3.7e-17	1288	0.73059	-0.0699404	0.0453187	0.123006	933	0.745981	0.0115098	0.0535707	0.82993
Venular Tortuosity	rs12911963	15	77807175	HMG20A	G/C	52798	0.666166	-0.0144115	0.00195034	7.1e-14	1288	0.914596	-0.172871	0.0693932	0.0128585	933	0.811361	-0.0395592	0.0589137	0.502086
Venular Tortuosity	rs11859314	16	51455794	--	G/A	52798	0.710098	0.0121009	0.00204247	2.8e-09	1288	0.600155	-0.047804	0.0406931	0.240317	933	0.78403	0.148454	0.0548148	0.00688898
Venular Tortuosity	rs12603193	17	70387448	--	A/G	52798	0.630392	-0.0103802	0.0018979	3.6e-08	1288	0.531056	-0.00300895	0.0396088	0.939458	933	0.398178	-0.0181887	0.0470451	0.699124
Venular Tortuosity	rs364530	17	75389267	SEPTIN9	C/T	52798	0.783704	0.0139411	0.002239	4.4e-10	1288	0.71118	-0.0401978	0.0429446	0.34943	933	0.707395	0.0337385	0.0501555	0.501321
Venular Tortuosity	rs1136956	19	39219780	ACTN4	T/C	52798	0.757245	-0.0335765	0.00213453	6e-58	1288	0.87927	-0.0689151	0.0600362	0.251229	933	0.724544	-0.079572	0.052035	0.126559
Venular Width	rs10630670	1	196836429	CFHR4	T/TG	52798	0.733564	0.527334	0.0886351	8.6e-10	1288	0.996506	-0.323247	0.337277	0.338041	933	0.999464	-0.734775	1.0045	0.46467
Venular Width	rs115456027	5	87919700	MEF2C	C/T	52798	0.923242	-1.0667	0.143645	6.4e-14	1288	0.994177	0.350869	0.263586	0.183383	933	0.973741	-0.19357	0.147237	0.188945
Venular Width	rs12206319	6	142363726	NMBR	C/T	52798	0.795639	0.727124	0.0945712	1.4e-14	1288	0.935171	0.105555	0.0802165	0.188453	933	0.779743	0.0492385	0.0578666	0.395048
Venular Width	rs6601542	8	10832865	XKR6	A/G	52798	0.621592	0.473321	0.0791087	1.5e-09	1288	0.203416	-0.0470936	0.0501387	0.347772	933	0.695606	-0.0109713	0.0496281	0.825086
Venular Width	rs77391671	8	130183779	--	A/T	52798	0.883804	-0.659094	0.118464	1.6e-08	1288	0.686724	0.0184198	0.0431797	0.669755	933	0.882101	0.0143909	0.0708246	0.839031
Venular Width	rs553833452	10	69963180	MYPN	T/TA	52798	0.812293	-0.572206	0.0997173	1.4e-08	1288	0.991071	-0.0423538	0.214677	0.843631	933	0.811361	-0.00907068	0.0583609	0.876521
Venular Width	rs34961350	13	28991902	FLT1	C/G	52798	0.784601	-0.602183	0.0930949	1.4e-10	1288	0.959627	0.0211827	0.0997043	0.831786	933	0.563773	-0.0474094	0.0467761	0.31107
Venular Width	rs8030213	15	53775605	WDR72	T/C	52798	0.727853	0.549504	0.0864032	3e-10	1288	0.619565	-0.00594511	0.0399332	0.881675	933	0.697749	-0.0703151	0.0512874	0.170709
Venular Width	rs281381	19	49214748	FUT2	T/C	52798	0.664873	0.576919	0.0807576	4.4e-13	1288	0.678571	-0.0621745	0.0416464	0.135707	933	0.602358	-0.0429524	0.047278	0.363848
Venular Width	rs7265807	20	22695089	FOXA2	C/T	52798	0.686822	-0.471523	0.081953	8e-09	1288	0.799689	-0.015894	0.0496066	0.748717	933	0.705788	-0.0524614	0.0508112	0.302121
Venular Width	rs2836445	21	39872696	ERG	G/A	52798	0.615857	0.432667	0.0780508	3.3e-08	1288	0.950311	0.00637956	0.090979	0.944108	933	0.644695	-0.01159	0.048252	0.810232

## Sheet: Table G
Table G. eQTL effects of SNPs associated in the GWAS													Legend
Trait	Chr	Pos	Nearest Gene	Database	Tissue	Gene	testedAllele	P.value	signed_stats	FDR	alignedDirection		TOC
Arteriolar Tortuosity	5	1104938	SLC12A7	GTEx/v8	Whole_Blood	ENSG00000113504	T	3.46373e-224	-0.875966	7.36208e-198	NA
Venular Width	19	49206108	FUT2	GTEx/v8	Esophagus_Mucosa	ENSG00000176920	G	1.778e-159	-0.725659	1.50287e-145	NA
Arteriolar Tortuosity	1	150703034	HORMAD1	GTEx/v8	Skin_Sun_Exposed_Lower_leg	ENSG00000143452	C	3.00415e-159	1.13647	3.28419e-139	+
Arteriolar Tortuosity	19	39260544	LGALS7	GTEx/v8	Skin_Sun_Exposed_Lower_leg	ENSG00000205076	A	4.90841e-152	-1.04116	6.49412e-137	+
Venular Tortuosity	2	242294913	SEPTIN2	GTEx/v8	Thyroid	ENSG00000168385	G	5.04125e-147	1.04127	8.54208e-144	+
Arteriolar Tortuosity	19	39277154	LGALS7B	GTEx/v8	Skin_Sun_Exposed_Lower_leg	ENSG00000178934	G	1.46213e-121	0.582305	9.1939e-106	-
Arteriolar Tortuosity	17	74684858	MXRA7	GTEx/v8	Muscle_Skeletal	ENSG00000182534	C	4.0708e-114	-0.640103	1.79474e-102	NA
Arteriolar Tortuosity	1	150649180	GOLPH3L	GTEx/v8	Nerve_Tibial	ENSG00000143457	G	2.18846e-112	0.872843	9.52301e-98	+
Arteriolar Tortuosity	2	242308625	SEPTIN2	GTEx/v8	Thyroid	ENSG00000168385	G	1.08071e-93	1.03142	8.54208e-144	NA
Arteriolar Tortuosity	1	227173477	ADCK3	GTEx/v8	Whole_Blood	ENSG00000163050	C	3.98559e-83	0.444181	1.55548e-70	+
Arteriolar Tortuosity	3	149702588	PFN2	GTEx/v8	Artery_Tibial	ENSG00000070087	G	3.11891e-82	-0.450809	2.61447e-72	-
Venular Tortuosity	9	130210111	RPL12	GTEx/v8	Muscle_Skeletal	ENSG00000197958	C	3.23122e-80	0.335434	3.5086e-79	+
Arteriolar Tortuosity	17	56781468	RAD51C	GTEx/v8	Whole_Blood	ENSG00000108384	C	1.41198e-79	0.745538	1.61496e-68	-
Arteriolar Tortuosity	22	38175477	TRIOBP	GTEx/v8	Thyroid	ENSG00000100106	T	1.98552e-77	0.507795	3.35553e-67	+
Arteriolar Tortuosity	1	183604905	ARPC5	GTEx/v8	Whole_Blood	ENSG00000162704	G	1.96168e-72	0.202921	1.24546e-62	+
Arteriolar Tortuosity	1	150726238	CTSS	GTEx/v8	Thyroid	ENSG00000163131	T	3.84907e-71	0.481875	3.09768e-61	+
Arteriolar Tortuosity	6	31375117	MICA	GTEx/v8	Cells_Cultured_fibroblasts	ENSG00000204520	G	2.4798e-68	-0.981793	8.51114e-67	NA
Arteriolar Tortuosity	1	183584835	NCF2	GTEx/v8	Artery_Tibial	ENSG00000116701	T	3.69315e-63	-0.590956	3.22226e-54	-
Venular Tortuosity	19	39271610	LGALS7	GTEx/v8	Esophagus_Mucosa	ENSG00000205076	T	3.24625e-61	-1.05903	4.14329e-79	NA
Arteriolar Tortuosity	5	132106561	SEPTIN8	GTEx/v8	Skin_Sun_Exposed_Lower_leg	ENSG00000164402	T	2.42984e-56	0.538601	1.96595e-47	+
Venular Tortuosity	9	130210111	SLC2A8	GTEx/v8	Muscle_Skeletal	ENSG00000136856	C	9.87378e-56	-0.5414	2.49987e-68	-
Arteriolar Tortuosity	1	151009634	BNIPL	GTEx/v8	Thyroid	ENSG00000163141	C	3.37133e-50	-0.65671	1.73774e-49	NA
Arteriolar Tortuosity	22	38204089	H1F0	GTEx/v8	Whole_Blood	ENSG00000189060	T	9.6846e-50	-0.336346	1.29397e-42	-
Venular Tortuosity	9	130185385	ZNF79	GTEx/v8	Cells_Cultured_fibroblasts	ENSG00000196152	A	6.02572e-49	-0.464682	1.76337e-48	-
Arteriolar Tortuosity	6	692805	EXOC2	GTEx/v8	Artery_Tibial	ENSG00000112685	G	1.12477e-47	-0.493111	3.16236e-45	-
Venular Width	19	49241006	IZUMO1	GTEx/v8	Lung	ENSG00000182264	G	2.80016e-46	-0.542802	1.59306e-44	NA
Arteriolar Tortuosity	14	65175364	PLEKHG3	GTEx/v8	Whole_Blood	ENSG00000126822	C	2.9236e-45	0.489354	3.36617e-37	-
Arteriolar Tortuosity	16	75432390	CFDP1	GTEx/v8	Cells_Cultured_fibroblasts	ENSG00000153774	C	3.55479e-45	-0.400806	4.4329e-38	-
Arteriolar Tortuosity	1	150369337	ADAMTSL4	GTEx/v8	Esophagus_Mucosa	ENSG00000143382	A	4.79975e-45	0.540926	5.60625e-72	NA
Venular Tortuosity	15	77641632	HMG20A	GTEx/v8	Artery_Tibial	ENSG00000140382	T	1.12652e-44	0.522888	2.30874e-36	NA
Venular Tortuosity	19	39283401	LGALS7B	GTEx/v8	Spleen	ENSG00000178934	G	1.89999e-42	-1.25128	2.9942e-35	NA
Arteriolar Tortuosity	22	38202403	GCArteriolar Tortuosity	GTEx/v8	Whole_Blood	ENSG00000100116	C	2.00479e-41	-0.419411	8.04294e-49	NA
Venular Width	19	49218060	RASIP1	GTEx/v8	Cells_Cultured_fibroblasts	ENSG00000105538	T	2.46961e-40	0.748936	1.7155e-42	NA
Arteriolar Tortuosity	5	132064301	KIF3A	GTEx/v8	Esophagus_Muscularis	ENSG00000131437	C	9.61426e-40	-0.526169	3.98875e-34	-
Arteriolar Tortuosity	5	63891146	RGS7BP	GTEx/v8	Skin_Sun_Exposed_Lower_leg	ENSG00000186479	C	4.49016e-39	0.57278	7.86116e-79	+
Arteriolar Tortuosity	4	120297156	C4orf3	GTEx/v8	Whole_Blood	ENSG00000164096	T	8.92168e-39	0.226744	4.79508e-32	NA
Arteriolar Tortuosity	1	151103790	C1orf56	GTEx/v8	Skin_Sun_Exposed_Lower_leg	ENSG00000143443	G	1.86721e-38	0.476705	1.18442e-31	+
Arteriolar Tortuosity	2	242442246	FARP2	GTEx/v8	Brain_Cerebellum	ENSG00000006607	T	2.11245e-38	0.842082	1.65458e-31	-
Arteriolar Tortuosity	15	75349901	SCAMP5	GTEx/v8	Cells_Cultured_fibroblasts	ENSG00000198794	T	5.19193e-38	0.740536	2.7999e-90	+
Arteriolar Tortuosity	19	39248152	CAPN12	GTEx/v8	Whole_Blood	ENSG00000182472	A	8.83822e-38	-0.590824	2.13679e-31	NA
Arteriolar Tortuosity	17	2216258	SGSM2	GTEx/v8	Skin_Sun_Exposed_Lower_leg	ENSG00000141258	C	1.04807e-36	0.424195	1.03069e-103	-
Arteriolar Tortuosity	14	61077484	C14orf39	GTEx/v8	Muscle_Skeletal	ENSG00000179008	C	1.05661e-36	0.548295	7.10763e-30	-
Arteriolar Tortuosity	16	75319046	BCAR1	GTEx/v8	Esophagus_Mucosa	ENSG00000050820	TCTGA	1.82417e-36	-0.443459	5.47864e-30	NA
Arteriolar Tortuosity	14	76187876	FLVCR2	GTEx/v8	Cells_Cultured_fibroblasts	ENSG00000119686	G	2.59605e-35	-0.479168	1.83784e-34	+
Arteriolar Tortuosity	16	75497160	TMEM170A	GTEx/v8	Skin_Sun_Exposed_Lower_leg	ENSG00000166822	T	3.01412e-35	0.391407	1.35441e-28	NA
Arteriolar Tortuosity	22	38204259	GALR3	GTEx/v8	Pancreas	ENSG00000128310	T	3.91373e-35	0.840209	1.66123e-49	-
Arteriolar Tortuosity	17	74706380	JMJD6	GTEx/v8	Whole_Blood	ENSG00000070495	T	5.81173e-35	-0.165965	8.81925e-29	-
Arteriolar Tortuosity	8	38108133	DDHD2	GTEx/v8	Nerve_Tibial	ENSG00000085788	G	7.34929e-35	0.254954	3.55654e-29	-
Arteriolar Tortuosity	1	150245082	C1orf54	GTEx/v8	Artery_Tibial	ENSG00000118292	A	1.12202e-34	-1.61934	5.11535e-28	+
Arteriolar Tortuosity	17	73920219	FBF1	GTEx/v8	Esophagus_Muscularis	ENSG00000188878	T	1.71682e-34	0.640415	1.45313e-71	-
Arteriolar Tortuosity	6	31496467	Arteriolar TortuosityP6V1G2	GTEx/v8	Artery_Tibial	ENSG00000213760	A	7.13269e-34	0.870282	3.38982e-44	NA
Venular Tortuosity	1	6685774	THAP3	GTEx/v8	Muscle_Skeletal	ENSG00000041988	T	9.67845e-34	-0.367568	3.26909e-38	NA
Arteriolar Tortuosity	1	6685774	THAP3	GTEx/v8	Muscle_Skeletal	ENSG00000041988	T	9.67845e-34	-0.367568	3.26909e-38	NA
Venular Width	19	39243969	LGALS7B	GTEx/v8	Esophagus_Mucosa	ENSG00000178934	T	1.00539e-32	0.691936	1.6794e-98	+
Arteriolar Tortuosity	17	73874684	TRIM65	GTEx/v8	Nerve_Tibial	ENSG00000141569	C	1.40871e-31	0.652084	2.57461e-30	-
Venular Tortuosity	9	130178912	LRSAM1	GTEx/v8	Muscle_Skeletal	ENSG00000148356	C	1.9702e-31	0.307872	3.1749e-25	+
Venular Tortuosity	2	242322586	FARP2	GTEx/v8	Brain_Cerebellum	ENSG00000006607	A	2.36703e-31	0.773191	1.65458e-31	-
Venular Width	15	89746567	POLG	GTEx/v8	Artery_Tibial	ENSG00000140521	C	3.11526e-31	0.32159	3.06031e-42	NA
Venular Tortuosity	19	39446799	SARS2	GTEx/v8	Skin_Sun_Exposed_Lower_leg	ENSG00000104835	G	3.3587e-31	-0.279427	1.4226e-49	-
Venular Width	19	39243969	LGALS7	GTEx/v8	Skin_Not_Sun_Exposed_Suprapubic	ENSG00000205076	T	3.82655e-31	-0.636891	3.25343e-118	-
Arteriolar Tortuosity	17	73873394	TRIM47	GTEx/v8	Brain_Cerebellum	ENSG00000132481	G	6.31682e-31	-0.879838	2.68694e-24	+
Venular Width	8	10584642	RP1L1	GTEx/v8	Esophagus_Mucosa	ENSG00000183638	C	1.07348e-30	-0.445478	6.3848e-24	+
Venular Width	19	39249306	CAPN12	GTEx/v8	Adipose_Subcutaneous	ENSG00000182472	C	2.90649e-30	0.573412	9.2003e-77	NA
Venular Width	10	70019371	PBLD	GTEx/v8	Muscle_Skeletal	ENSG00000108187	A	3.03753e-30	0.520674	1.62797e-28	+
Venular Tortuosity	9	130477160	PTRH1	GTEx/v8	Thyroid	ENSG00000187024	A	4.5253e-30	-0.258316	4.24792e-24	+
Arteriolar Tortuosity	9	130477160	PTRH1	GTEx/v8	Thyroid	ENSG00000187024	A	4.5253e-30	-0.258316	4.24792e-24	NA
Arteriolar Tortuosity	4	120136135	FABP2	GTEx/v8	Whole_Blood	ENSG00000145384	A	1.82099e-29	0.477033	8.58581e-60	NA
Arteriolar Tortuosity	4	1797741	FGFR3	GTEx/v8	Adipose_Subcutaneous	ENSG00000068078	C	2.7401e-29	0.516181	1.94601e-23	+
Arteriolar Tortuosity	22	36038076	APOL6	GTEx/v8	Artery_Tibial	ENSG00000221963	T	3.98776e-29	-0.315009	1.22613e-41	-
Arteriolar Tortuosity	1	201886769	LMOD1	GTEx/v8	Adipose_Subcutaneous	ENSG00000163431	T	6.47623e-29	-0.228252	4.88871e-23	NA
Arteriolar Tortuosity	1	150339290	TARS2	GTEx/v8	Muscle_Skeletal	ENSG00000143374	A	1.54641e-28	-0.189242	5.50498e-23	NA
Arteriolar Tortuosity	17	2216258	TSR1	GTEx/v8	Skin_Sun_Exposed_Lower_leg	ENSG00000167721	C	1.00335e-27	0.238104	4.9203e-36	-
Venular Width	19	49206108	NTN5	GTEx/v8	Thyroid	ENSG00000142233	G	2.37283e-27	0.306759	3.04764e-22	NA
Arteriolar Tortuosity	10	64556238	ADO	GTEx/v8	Muscle_Skeletal	ENSG00000181915	C	3.75242e-27	-0.233905	3.9791e-34	NA
Arteriolar Tortuosity	20	33720592	EDEM2	GTEx/v8	Heart_Arteriolar Tortuosityrial_Appendage	ENSG00000088298	C	7.40255e-27	0.512282	1.27686e-20	-
Arteriolar Tortuosity	9	136237672	SURF1	GTEx/v8	Adipose_Subcutaneous	ENSG00000148290	A	9.03612e-27	-0.467989	2.67588e-56	-
Arteriolar Tortuosity	17	2152306	SRR	GTEx/v8	Muscle_Skeletal	ENSG00000167720	G	1.38429e-26	0.398342	4.61484e-96	+
Venular Tortuosity	17	1975657	SRR	GTEx/v8	Muscle_Skeletal	ENSG00000167720	A	3.09631e-26	-0.414462	4.61484e-96	NA
Arteriolar Tortuosity	1	227440734	CDC42BPA	GTEx/v8	Muscle_Skeletal	ENSG00000143776	A	6.84888e-26	-0.312	2.05109e-20	-
Venular Tortuosity	9	130503612	FPGS	GTEx/v8	Cells_Cultured_fibroblasts	ENSG00000136877	G	7.31764e-26	0.342565	1.39361e-20	-
Arteriolar Tortuosity	9	130503612	FPGS	GTEx/v8	Cells_Cultured_fibroblasts	ENSG00000136877	G	7.31764e-26	0.342565	1.39361e-20	NA
Venular Tortuosity	15	77376183	TSPAN3	GTEx/v8	Skin_Sun_Exposed_Lower_leg	ENSG00000140391	A	1.55794e-25	0.233017	1.14226e-19	-
Arteriolar Tortuosity	1	150799755	CTSK	GTEx/v8	Whole_Blood	ENSG00000143387	T	4.36889e-25	0.272551	2.08265e-43	+
Arteriolar Tortuosity	1	150424300	ECM1	GTEx/v8	Cells_Cultured_fibroblasts	ENSG00000143369	A	5.23025e-25	0.514744	6.52946e-20	NA
Arteriolar Tortuosity	20	33660442	TRPC4AP	GTEx/v8	Whole_Blood	ENSG00000100991	G	6.69785e-25	-0.295284	2.64288e-19	+
Arteriolar Tortuosity	1	153942156	CREB3L4	GTEx/v8	Nerve_Tibial	ENSG00000143578	A	8.66117e-25	0.38488	2.94428e-37	+
Arteriolar Tortuosity	6	31695590	SKIV2L	GTEx/v8	Esophagus_Muscularis	ENSG00000204351	C	9.11633e-25	0.765806	7.84381e-83	+
Arteriolar Tortuosity	15	75361650	PPCDC	GTEx/v8	Adipose_Subcutaneous	ENSG00000138621	C	9.23185e-25	0.416379	7.91613e-33	+
Arteriolar Tortuosity	15	75338890	RPP25	GTEx/v8	Artery_Tibial	ENSG00000178718	C	2.44741e-24	0.393309	2.3878e-112	NA
Arteriolar Tortuosity	1	22321929	CDC42	GTEx/v8	Whole_Blood	ENSG00000070831	T	3.46331e-24	0.131212	6.60875e-24	+
Arteriolar Tortuosity	14	61022789	SIX6	GTEx/v8	Muscle_Skeletal	ENSG00000184302	G	4.71361e-24	0.603232	1.30375e-18	-
Arteriolar Tortuosity	17	57220124	SKA2	GTEx/v8	Esophagus_Mucosa	ENSG00000182628	T	6.19881e-24	0.321244	1.45155e-18	-
Arteriolar Tortuosity	13	111054111	COL4A1	GTEx/v8	Cells_Cultured_fibroblasts	ENSG00000187498	C	6.63745e-24	0.315846	5.16489e-19	NA
Arteriolar Tortuosity	6	31192766	HLA-C	GTEx/v8	Muscle_Skeletal	ENSG00000204525	T	8.01589e-24	-0.520538	5.72033e-100	+
Venular Width	8	11447093	BLK	GTEx/v8	Cells_Cultured_fibroblasts	ENSG00000136573	A	8.80778e-24	0.414616	1.98306e-26	-
Venular Tortuosity	19	39284538	CAPN12	GTEx/v8	Adipose_Subcutaneous	ENSG00000182472	T	2.05365e-23	0.572883	9.2003e-77	NA
Venular Width	19	49116555	FAM83E	GTEx/v8	Brain_Cerebellum	ENSG00000105523	G	2.94325e-23	-0.845069	4.44418e-18	+
Arteriolar Tortuosity	17	74658072	ST6GALNAC1	GTEx/v8	Esophagus_Mucosa	ENSG00000070526	A	3.14858e-23	-0.315983	1.54265e-18	+
Arteriolar Tortuosity	4	120047837	USP53	GTEx/v8	Adipose_Visceral_Omentum	ENSG00000145390	G	3.4587e-23	0.330599	1.43709e-18	+
Arteriolar Tortuosity	1	914852	C1orf170	GTEx/v8	Esophagus_Gastroesophageal_Junction	ENSG00000187642	C	3.90635e-23	0.637062	1.18582e-17	-
Arteriolar Tortuosity	6	39885673	MOCS1	GTEx/v8	Adrenal_Gland	ENSG00000124615	C	3.33137e-22	-0.656829	9.60558e-17	+
Venular Width	1	196719817	CFHR3	GTEx/v8	Nerve_Tibial	ENSG00000116785	G	3.46267e-22	0.592311	1.06287e-54	-
Arteriolar Tortuosity	2	242185820	ANO7	GTEx/v8	Thyroid	ENSG00000146205	C	3.88352e-22	0.558369	1.55143e-29	+
Arteriolar Tortuosity	8	38847959	TM2D2	GTEx/v8	Muscle_Skeletal	ENSG00000169490	T	5.8139e-22	-0.317261	3.30874e-19	+
Venular Tortuosity	15	77803660	PEAK1	GTEx/v8	Thyroid	ENSG00000173517	C	6.47367e-22	0.321068	1.18742e-16	NA
Arteriolar Tortuosity	3	149676059	RNF13	GTEx/v8	Whole_Blood	ENSG00000082996	A	8.39384e-22	0.122568	4.86665e-17	+
Venular Tortuosity	17	75387490	SEPTIN9	GTEx/v8	Brain_Cerebellum	ENSG00000184640	C	8.61768e-22	-0.660359	1.61652e-16	+
Venular Width	1	196699044	CFHR1	GTEx/v8	Liver	ENSG00000244414	G	1.28965e-21	-0.700081	2.72791e-42	+
Venular Tortuosity	19	38733643	C19orf33	GTEx/v8	Skin_Sun_Exposed_Lower_leg	ENSG00000167644	A	2.45949e-21	-0.249788	2.43618e-62	-
Arteriolar Tortuosity	6	31240959	PSORS1C2	GTEx/v8	Lung	ENSG00000204538	G	3.2193e-21	0.639595	1.4872e-47	-
Arteriolar Tortuosity	1	23291582	LACTBL1	GTEx/v8	Testis	ENSG00000215906	A	3.67825e-21	-0.632841	9.32385e-48	+
Venular Width	19	39144244	ACTN4	GTEx/v8	Muscle_Skeletal	ENSG00000130402	T	6.77448e-21	0.178184	3.1869e-16	NA
Venular Width	8	11444516	FDFT1	GTEx/v8	Artery_Tibial	ENSG00000079459	A	1.501e-20	0.294895	1.29552e-43	+
Arteriolar Tortuosity	1	150723747	ARNT	GTEx/v8	Thyroid	ENSG00000143437	C	5.16632e-20	0.224081	5.86826e-24	+
Arteriolar Tortuosity	1	167586861	RCSD1	GTEx/v8	Thyroid	ENSG00000198771	T	5.18433e-20	0.262699	1.5785e-15	-
Venular Width	1	196397886	CFH	GTEx/v8	Nerve_Tibial	ENSG00000000971	A	9.67239e-20	-0.328086	1.42058e-18	-
Arteriolar Tortuosity	13	111054111	COL4A2	GTEx/v8	Cells_Cultured_fibroblasts	ENSG00000134871	C	1.08607e-19	0.317122	4.42102e-15	NA
Arteriolar Tortuosity	14	76119728	TTLL5	GTEx/v8	Cells_Cultured_fibroblasts	ENSG00000119685	T	1.47709e-19	0.212259	3.76682e-15	-
Arteriolar Tortuosity	1	150861229	CERS2	GTEx/v8	Brain_Cerebellum	ENSG00000143418	T	1.56849e-19	0.477002	2.28511e-15	+
Arteriolar Tortuosity	13	111189673	RAB20	GTEx/v8	Thyroid	ENSG00000139832	G	1.61356e-19	-0.319886	5.59291e-58	-
Arteriolar Tortuosity	3	192670768	MB21D2	GTEx/v8	Adipose_Visceral_Omentum	ENSG00000180611	A	1.71361e-19	-0.314692	1.15989e-14	+
Arteriolar Tortuosity	15	52009478	LYSMD2	GTEx/v8	Muscle_Skeletal	ENSG00000140280	C	1.73889e-19	0.317164	1.64891e-58	-
Venular Tortuosity	19	38736485	PPP1R14A	GTEx/v8	Nerve_Tibial	ENSG00000167641	T	2.0816e-19	-0.265676	7.61842e-15	-
Arteriolar Tortuosity	15	52152268	TMOD2	GTEx/v8	Whole_Blood	ENSG00000128872	A	6.6049e-19	0.25553	3.30332e-37	+
Arteriolar Tortuosity	20	33721356	PROCR	GTEx/v8	Skin_Sun_Exposed_Lower_leg	ENSG00000101000	G	7.45409e-19	0.417176	3.08039e-16	-
Arteriolar Tortuosity	1	91964229	CDC7	GTEx/v8	Esophagus_Mucosa	ENSG00000097046	T	7.51954e-19	0.31144	2.01861e-72	+
Arteriolar Tortuosity	2	54920697	SPTBN1	GTEx/v8	Whole_Blood	ENSG00000115306	T	1.19818e-18	-0.223255	3.95666e-52	-
Venular Width	19	49234299	MAMSTR	GTEx/v8	Heart_Arteriolar Tortuosityrial_Appendage	ENSG00000176909	T	1.37414e-18	-0.391859	2.98816e-20	NA
Arteriolar Tortuosity	1	227732069	ZNF678	GTEx/v8	Muscle_Skeletal	ENSG00000181450	T	1.60425e-18	0.474628	6.91402e-15	+
Venular Width	10	70041263	Arteriolar TortuosityOH7	GTEx/v8	Adrenal_Gland	ENSG00000179774	A	1.61394e-18	-0.743449	2.6648e-14	-
Arteriolar Tortuosity	17	56888299	TRIM37	GTEx/v8	Whole_Blood	ENSG00000108395	G	1.64923e-18	0.325324	4.76905e-84	NA
Arteriolar Tortuosity	11	8842273	TMEM9B	GTEx/v8	Thyroid	ENSG00000175348	A	1.76169e-18	0.193058	1.19965e-19	+
Arteriolar Tortuosity	20	33801283	EIF6	GTEx/v8	Whole_Blood	ENSG00000242372	C	2.61511e-18	0.258158	5.46094e-24	-
Arteriolar Tortuosity	14	106078447	TMEM121	GTEx/v8	Whole_Blood	ENSG00000184986	T	4.20615e-18	-0.40333	2.48995e-36	-
Venular Width	10	70044616	RUFY2	GTEx/v8	Cells_Cultured_fibroblasts	ENSG00000204130	C	5.98397e-18	0.36625	5.1732e-32	+
Arteriolar Tortuosity	13	47251712	LRCH1	GTEx/v8	Heart_Left_Ventricle	ENSG00000136141	A	6.55681e-18	-0.305093	5.31673e-13	-
Arteriolar Tortuosity	1	978603	C1orf159	GTEx/v8	Thyroid	ENSG00000131591	C	6.6353e-18	0.190901	5.53773e-37	-
Arteriolar Tortuosity	8	38323693	FGFR1	GTEx/v8	Whole_Blood	ENSG00000077782	G	8.35774e-18	0.747865	8.23959e-40	-
Arteriolar Tortuosity	2	54881621	EML6	GTEx/v8	Artery_Tibial	ENSG00000214595	C	1.12691e-17	0.404767	4.44762e-65	+
Arteriolar Tortuosity	22	36038076	APOL5	GTEx/v8	Adipose_Subcutaneous	ENSG00000128313	T	1.77536e-17	-0.396607	9.95431e-19	-
Arteriolar Tortuosity	22	38183382	SH3BP1	GTEx/v8	Whole_Blood	ENSG00000100092	T	2.19374e-17	-0.219492	7.06058e-97	-
Arteriolar Tortuosity	15	75329091	MPI	GTEx/v8	Cells_Cultured_fibroblasts	ENSG00000178802	C	2.28786e-17	0.246304	2.12377e-30	NA
Arteriolar Tortuosity	1	170423159	KIFAP3	GTEx/v8	Cells_Cultured_fibroblasts	ENSG00000075945	A	6.12095e-17	0.254439	6.09255e-13	-
Arteriolar Tortuosity	15	75329091	ULK3	GTEx/v8	Whole_Blood	ENSG00000140474	C	7.08434e-17	-0.126441	9.35217e-40	NA
Venular Width	1	196679909	CFHR4	GTEx/v8	Liver	ENSG00000134365	GT	1.12925e-16	-0.465193	9.93768e-12	+
Arteriolar Tortuosity	11	8859384	AKIP1	GTEx/v8	Artery_Tibial	ENSG00000166452	A	1.48537e-16	0.253603	5.60193e-12	+
Arteriolar Tortuosity	1	978603	AGRN	GTEx/v8	Adipose_Visceral_Omentum	ENSG00000188157	C	1.84971e-16	0.212614	2.61383e-18	-
Arteriolar Tortuosity	1	151026815	MLLT11	GTEx/v8	Nerve_Tibial	ENSG00000213190	T	1.86694e-16	-0.235656	3.1417e-12	NA
Venular Width	8	11433780	FAM167A	GTEx/v8	Whole_Blood	ENSG00000154319	C	3.10047e-16	-0.363187	5.77666e-52	+
Venular Tortuosity	19	39316194	ECH1	GTEx/v8	Whole_Blood	ENSG00000104823	T	3.78273e-16	0.133451	5.89583e-12	-
Arteriolar Tortuosity	1	151115752	SEMA6C	GTEx/v8	Muscle_Skeletal	ENSG00000143434	T	4.18669e-16	-0.211911	8.19929e-12	+
Arteriolar Tortuosity	17	56458183	SUPT4H1	GTEx/v8	Colon_Transverse	ENSG00000213246	A	4.29044e-16	-0.346212	2.50003e-18	+
Arteriolar Tortuosity	1	153952598	SLC39A1	GTEx/v8	Whole_Blood	ENSG00000143570	G	4.35772e-16	0.136828	1.02947e-11	NA
Arteriolar Tortuosity	10	105664459	SLK	GTEx/v8	Skin_Sun_Exposed_Lower_leg	ENSG00000065613	T	4.71673e-16	0.165456	2.67125e-18	-
Venular Tortuosity	19	39360720	RINL	GTEx/v8	Cells_Cultured_fibroblasts	ENSG00000187994	A	4.73881e-16	0.283564	5.58935e-12	+
Arteriolar Tortuosity	9	130478653	TTC16	GTEx/v8	Whole_Blood	ENSG00000167094	A	9.82581e-16	0.142125	1.7553e-11	-
Arteriolar Tortuosity	6	31240959	PSORS1C1	GTEx/v8	Lung	ENSG00000204540	G	1.07134e-15	0.495997	3.64977e-51	-
Arteriolar Tortuosity	9	130576776	CDK9	GTEx/v8	Skin_Sun_Exposed_Lower_leg	ENSG00000136807	G	1.28318e-15	-0.197173	1.8549e-11	-
Venular Width	6	142505684	NMBR	GTEx/v8	Testis	ENSG00000135577	CTG	1.4024e-15	0.307494	6.3261e-14	+
Arteriolar Tortuosity	5	132063560	IL4	GTEx/v8	Pituitary	ENSG00000113520	T	1.60163e-15	-0.871892	2.34902e-18	-
Arteriolar Tortuosity	17	73832384	UNC13D	GTEx/v8	Whole_Blood	ENSG00000092929	T	2.02715e-15	-0.142246	5.83606e-19	+
Arteriolar Tortuosity	6	31220274	POU5F1	GTEx/v8	Adipose_Subcutaneous	ENSG00000204531	A	2.0802e-15	-0.515247	4.30593e-36	+
Arteriolar Tortuosity	1	150726238	ANXA9	GTEx/v8	Skin_Not_Sun_Exposed_Suprapubic	ENSG00000143412	T	2.29396e-15	0.212694	1.19857e-21	+
Arteriolar Tortuosity	1	22318473	CELA3A	GTEx/v8	Pancreas	ENSG00000142789	T	2.37272e-15	0.362931	5.56755e-12	NA
Venular Tortuosity	9	130477160	TTC16	GTEx/v8	Whole_Blood	ENSG00000167094	A	2.65238e-15	0.137476	1.7553e-11	-
Venular Tortuosity	9	130554998	CDK9	GTEx/v8	Skin_Sun_Exposed_Lower_leg	ENSG00000136807	A	4.36624e-15	-0.201185	1.8549e-11	-
Arteriolar Tortuosity	19	46238926	SYMPK	GTEx/v8	Testis	ENSG00000125755	T	4.83884e-15	-0.25696	1.52855e-21	+
Arteriolar Tortuosity	19	14571966	GIPC1	GTEx/v8	Muscle_Skeletal	ENSG00000123159	G	4.90325e-15	-0.221373	1.1901e-16	NA
Arteriolar Tortuosity	17	73917914	TEN1	GTEx/v8	Nerve_Tibial	ENSG00000257949	CACGGGG	5.21739e-15	-0.527018	6.89085e-58	+
Venular Tortuosity	19	39308602	LGALS4	GTEx/v8	Skin_Sun_Exposed_Lower_leg	ENSG00000171747	C	7.39262e-15	0.307989	7.45503e-11	NA
Arteriolar Tortuosity	1	170387806	PRRX1	GTEx/v8	Cells_Cultured_fibroblasts	ENSG00000116132	T	1.13379e-14	0.217496	1.52239e-10	-
Arteriolar Tortuosity	1	150860545	SETDB1	GTEx/v8	Skin_Not_Sun_Exposed_Suprapubic	ENSG00000143379	TA	1.26293e-14	-0.234041	1.55723e-10	-
Arteriolar Tortuosity	10	64887856	REEP3	GTEx/v8	Adipose_Visceral_Omentum	ENSG00000165476	T	1.33452e-14	0.165072	3.41979e-11	+
Arteriolar Tortuosity	6	151007844	PLEKHG1	GTEx/v8	Testis	ENSG00000120278	C	1.39666e-14	-0.281679	2.81306e-10	+
Venular Tortuosity	9	130491633	TOR2A	GTEx/v8	Thyroid	ENSG00000160404	C	1.53901e-14	0.212116	1.52575e-10	-
Arteriolar Tortuosity	9	130491633	TOR2A	GTEx/v8	Thyroid	ENSG00000160404	C	1.53901e-14	0.212116	1.52575e-10	-
Arteriolar Tortuosity	8	38243227	PPAPDC1B	GTEx/v8	Brain_Cerebellum	ENSG00000147535	A	1.86676e-14	0.686625	2.19286e-10	NA
Arteriolar Tortuosity	19	39295162	LGALS4	GTEx/v8	Adipose_Subcutaneous	ENSG00000171747	A	2.0048e-14	-0.332846	2.86361e-10	+
Arteriolar Tortuosity	1	151026815	CDC42SE1	GTEx/v8	Muscle_Skeletal	ENSG00000197622	T	3.15632e-14	0.214947	2.83549e-10	NA
Arteriolar Tortuosity	19	46354329	RSPH6A	GTEx/v8	Testis	ENSG00000104941	G	7.76567e-14	0.196134	7.97802e-10	+
Arteriolar Tortuosity	10	64887856	NRBF2	GTEx/v8	Cells_Cultured_fibroblasts	ENSG00000148572	T	9.24722e-14	0.14798	7.65617e-10	+
Venular Tortuosity	15	77844375	LINGO1	GTEx/v8	Artery_Tibial	ENSG00000169783	C	1.01638e-13	0.215051	5.47811e-13	-
Arteriolar Tortuosity	6	31815723	STK19	GTEx/v8	Skin_Sun_Exposed_Lower_leg	ENSG00000204344	T	1.03207e-13	-0.371501	3.77999e-22	NA
Arteriolar Tortuosity	2	242407179	STK25	GTEx/v8	Colon_Transverse	ENSG00000115694	A	1.22802e-13	0.306032	3.69706e-09	-
Arteriolar Tortuosity	1	151013500	LYSMD1	GTEx/v8	Muscle_Skeletal	ENSG00000163155	T	1.25034e-13	-0.248247	5.46196e-13	NA
Arteriolar Tortuosity	1	150130835	PLEKHO1	GTEx/v8	Brain_Cerebellum	ENSG00000023902	G	1.74462e-13	0.373762	1.55843e-09	+
Venular Width	1	196383601	KCNT2	GTEx/v8	Artery_Tibial	ENSG00000162687	C	1.74743e-13	-0.249048	1.2455e-14	-
Arteriolar Tortuosity	6	31496467	NCR3	GTEx/v8	Whole_Blood	ENSG00000204475	A	2.16359e-13	-0.221043	4.90979e-11	NA
Arteriolar Tortuosity	6	31751588	LY6G6C	GTEx/v8	Esophagus_Mucosa	ENSG00000204421	A	2.34208e-13	-0.526149	3.53452e-41	-
Arteriolar Tortuosity	7	91043217	FZD1	GTEx/v8	Whole_Blood	ENSG00000157240	T	2.55089e-13	-0.23399	5.21937e-26	+
Arteriolar Tortuosity	17	73917914	MRPL38	GTEx/v8	Muscle_Skeletal	ENSG00000204316	CACGGGG	2.56579e-13	0.229867	6.32462e-23	-
Arteriolar Tortuosity	19	46178661	SNRPD2	GTEx/v8	Skin_Sun_Exposed_Lower_leg	ENSG00000125743	C	3.79061e-13	-0.122087	4.96814e-41	-
Arteriolar Tortuosity	6	31240959	MICB	GTEx/v8	Skin_Sun_Exposed_Lower_leg	ENSG00000204516	G	4.40193e-13	-0.338428	4.66145e-58	+
Arteriolar Tortuosity	4	8277142	HTRA3	GTEx/v8	Whole_Blood	ENSG00000170801	G	4.6455e-13	0.184041	1.09303e-21	-
Arteriolar Tortuosity	6	31247270	HLA-B	GTEx/v8	Adipose_Subcutaneous	ENSG00000234745	A	5.11347e-13	0.231822	5.75822e-16	NA
Arteriolar Tortuosity	6	31758240	VARS2	GTEx/v8	Thyroid	ENSG00000137411	A	5.36962e-13	-0.49395	9.72013e-50	-
Arteriolar Tortuosity	6	31496467	BAG6	GTEx/v8	Esophagus_Muscularis	ENSG00000204463	A	5.41699e-13	0.362042	9.59049e-21	NA
Arteriolar Tortuosity	1	153953037	CRTC2	GTEx/v8	Muscle_Skeletal	ENSG00000160741	A	5.50891e-13	-0.110652	1.50324e-09	NA
Venular Width	8	11027491	MTMR9	GTEx/v8	Colon_Sigmoid	ENSG00000104643	TAA	5.90398e-13	-0.243386	8.54698e-28	+
Arteriolar Tortuosity	1	150453242	RPRD2	GTEx/v8	Esophagus_Muscularis	ENSG00000163125	G	6.17374e-13	0.158098	1.57249e-10	NA
Arteriolar Tortuosity	4	119949960	SYNPO2	GTEx/v8	Cells_Cultured_fibroblasts	ENSG00000172403	C	6.23395e-13	-0.17298	6.36696e-20	NA
Arteriolar Tortuosity	10	105667110	OBFC1	GTEx/v8	Whole_Blood	ENSG00000107960	C	6.63633e-13	-0.172193	2.26974e-10	+
Venular Width	10	70012289	DNA2	GTEx/v8	Esophagus_Muscularis	ENSG00000138346	A	8.8996e-13	-0.412579	7.11312e-60	-
Arteriolar Tortuosity	11	8877704	NRIP3	GTEx/v8	Heart_Arteriolar Tortuosityrial_Appendage	ENSG00000175352	C	1.24276e-12	-0.349539	3.10761e-08	+
Arteriolar Width	12	7059640	PTPN6	GTEx/v8	Skin_Not_Sun_Exposed_Suprapubic	ENSG00000111679	G	1.25636e-12	0.386905	1.84812e-18	NA
Venular Tortuosity	15	77575505	PSTPIP1	GTEx/v8	Adipose_Subcutaneous	ENSG00000140368	C	1.4217e-12	0.187489	5.72719e-17	-
Arteriolar Tortuosity	6	31209831	CCHCR1	GTEx/v8	Skin_Not_Sun_Exposed_Suprapubic	ENSG00000204536	A	1.51668e-12	-0.41803	2.64177e-25	+
Arteriolar Tortuosity	1	68288193	GNG12	GTEx/v8	Muscle_Skeletal	ENSG00000172380	C	1.66693e-12	-0.172349	1.01932e-08	-
Arteriolar Tortuosity	15	74634899	ISLR2	GTEx/v8	Muscle_Skeletal	ENSG00000167178	G	2.22055e-12	-0.25923	1.86353e-08	+
Venular Tortuosity	19	39449513	FBXO17	GTEx/v8	Cells_Cultured_fibroblasts	ENSG00000269190	A	2.71016e-12	-0.240062	4.14355e-34	-
Arteriolar Tortuosity	1	933790	HES4	GTEx/v8	Nerve_Tibial	ENSG00000188290	A	3.3153e-12	-0.188187	1.76149e-08	+
Arteriolar Tortuosity	15	74610279	ISLR	GTEx/v8	Muscle_Skeletal	ENSG00000129009	T	3.74504e-12	-0.12299	2.00958e-08	NA
Arteriolar Tortuosity	4	120095288	MYOZ2	GTEx/v8	Nerve_Tibial	ENSG00000172399	A	3.90589e-12	-0.414556	2.37859e-08	+
Arteriolar Tortuosity	1	949608	ISG15	GTEx/v8	Adipose_Subcutaneous	ENSG00000187608	A	4.9785e-12	0.208654	4.74883e-08	+
Venular Tortuosity	19	39192116	CArteriolar TortuositySPERG	GTEx/v8	Whole_Blood	ENSG00000099338	A	5.1247e-12	0.992707	5.85182e-43	+
Arteriolar Tortuosity	15	75019449	SCAMP2	GTEx/v8	Esophagus_Mucosa	ENSG00000140497	T	5.2781e-12	0.163795	8.08755e-24	NA
Arteriolar Tortuosity	1	150482255	SV2A	GTEx/v8	Cells_Cultured_fibroblasts	ENSG00000159164	G	5.38583e-12	-0.368093	1.52842e-40	NA
Arteriolar Tortuosity	1	153890988	DENND4B	GTEx/v8	Artery_Tibial	ENSG00000198837	G	5.95907e-12	0.149332	1.18138e-24	+
Arteriolar Tortuosity	1	916834	PLEKHN1	GTEx/v8	ProstArteriolar Tortuositye	ENSG00000187583	A	6.62052e-12	0.241609	1.97561e-07	-
Venular Tortuosity	19	39015174	RYR1	GTEx/v8	Brain_Anterior_cingulArteriolar Tortuositye_cortex_BA24	ENSG00000196218	T	6.78969e-12	-0.649315	5.21741e-08	-
Arteriolar Tortuosity	15	52152268	TMOD3	GTEx/v8	Skin_Not_Sun_Exposed_Suprapubic	ENSG00000138594	A	7.21908e-12	-0.176157	4.3478e-20	-
Arteriolar Tortuosity	6	31330969	HCG27	GTEx/v8	Whole_Blood	ENSG00000206344	A	8.54181e-12	0.126912	1.24351e-22	-
Arteriolar Tortuosity	2	242214749	HDLBP	GTEx/v8	Nerve_Tibial	ENSG00000115677	A	1.16384e-11	0.21074	1.80799e-37	-
Arteriolar Tortuosity	9	136139265	OBP2B	GTEx/v8	Skin_Sun_Exposed_Lower_leg	ENSG00000171102	C	1.52118e-11	0.247574	8.2113e-45	NA
Arteriolar Tortuosity	8	38033989	LSM1	GTEx/v8	Esophagus_Mucosa	ENSG00000175324	C	1.67165e-11	0.214292	6.45441e-08	-
Venular Tortuosity	7	96379432	DLX6	GTEx/v8	Adipose_Subcutaneous	ENSG00000006377	G	1.91137e-11	0.298671	1.07392e-07	-
Arteriolar Tortuosity	2	11313340	PQLC3	GTEx/v8	Pancreas	ENSG00000162976	G	2.39189e-11	-0.694838	5.70529e-23	NA
Arteriolar Tortuosity	1	68327576	DIRAS3	GTEx/v8	Nerve_Tibial	ENSG00000162595	C	3.40652e-11	-0.265582	1.584e-07	-
Arteriolar Tortuosity	15	74607506	RP11-247C2.2	GTEx/v8	Muscle_Skeletal	ENSG00000248540	T	3.58734e-11	-0.317808	1.49926e-07	+
Arteriolar Tortuosity	1	153980341	C1orf43	GTEx/v8	Skin_Not_Sun_Exposed_Suprapubic	ENSG00000143612	T	3.89867e-11	0.152112	9.48231e-09	+
Arteriolar Tortuosity	1	201878620	SHISA4	GTEx/v8	Thyroid	ENSG00000198892	C	4.55651e-11	0.247863	8.63179e-69	NA
Venular Tortuosity	2	242225269	HDLBP	GTEx/v8	Nerve_Tibial	ENSG00000115677	A	5.16435e-11	0.207716	1.80799e-37	-
Arteriolar Tortuosity	15	56285625	NEDD4	GTEx/v8	Adipose_Visceral_Omentum	ENSG00000069869	A	5.45962e-11	0.335975	1.65223e-12	NA
Venular Tortuosity	7	96506452	DLX5	GTEx/v8	Esophagus_Mucosa	ENSG00000105880	G	5.76591e-11	-0.275058	3.26464e-07	NA
Arteriolar Width	1	32164871	COL16A1	GTEx/v8	Testis	ENSG00000084636	G	6.31405e-11	-1.14779	7.00893e-12	-
Arteriolar Tortuosity	2	218711738	TNS1	GTEx/v8	Whole_Blood	ENSG00000079308	A	8.01181e-11	0.113847	5.17909e-07	NA
Venular Width	8	11433780	DEFB134	GTEx/v8	Pancreas	ENSG00000205882	C	8.19875e-11	-0.396609	1.26369e-17	+
Venular Width	8	11444837	CTSB	GTEx/v8	Artery_Tibial	ENSG00000164733	T	8.96349e-11	-0.182278	3.41996e-40	-
Arteriolar Tortuosity	22	38202403	MICALL1	GTEx/v8	Esophagus_Muscularis	ENSG00000100139	C	1.02856e-10	0.118073	3.574e-08	NA
Arteriolar Tortuosity	8	38847959	ADAM32	GTEx/v8	Adipose_Subcutaneous	ENSG00000197140	T	1.05412e-10	-0.278648	7.03782e-63	+
Arteriolar Tortuosity	6	31375117	ZBTB12	GTEx/v8	Whole_Blood	ENSG00000204366	G	1.16543e-10	0.318038	8.85936e-52	NA
Venular Tortuosity	1	227191011	CDC42BPA	GTEx/v8	Muscle_Skeletal	ENSG00000143776	G	1.16804e-10	0.250461	2.05109e-20	NA
Arteriolar Tortuosity	16	14067862	ERCC4	GTEx/v8	Muscle_Skeletal	ENSG00000175595	T	1.24587e-10	0.167748	1.20825e-12	+
Arteriolar Tortuosity	1	951283	RNF223	GTEx/v8	Skin_Not_Sun_Exposed_Suprapubic	ENSG00000237330	T	1.54417e-10	-0.207732	5.61491e-09	+
Arteriolar Tortuosity	17	56458129	BZRAP1	GTEx/v8	Esophagus_Mucosa	ENSG00000005379	C	1.64919e-10	0.198397	3.845e-21	-
Arteriolar Tortuosity	17	73832384	WBP2	GTEx/v8	Brain_Frontal_Cortex_BA9	ENSG00000132471	T	1.76436e-10	-0.411142	3.09e-06	+
Venular Tortuosity	19	39128967	EIF3K	GTEx/v8	Adipose_Subcutaneous	ENSG00000178982	G	1.86587e-10	0.193511	8.12752e-07	NA
Arteriolar Tortuosity	19	39128967	EIF3K	GTEx/v8	Adipose_Subcutaneous	ENSG00000178982	G	1.86587e-10	0.193511	8.12752e-07	+
Arteriolar Tortuosity	5	159485802	PWWP2A	GTEx/v8	Skin_Not_Sun_Exposed_Suprapubic	ENSG00000170234	C	1.96807e-10	-0.202563	3.03648e-11	-
Arteriolar Tortuosity	9	136237672	REXO4	GTEx/v8	Cells_Cultured_fibroblasts	ENSG00000148300	A	1.99777e-10	-0.234594	2.33124e-24	-
Arteriolar Tortuosity	17	57210313	TEX14	GTEx/v8	Nerve_Tibial	ENSG00000121101	A	2.37995e-10	0.585631	9.02482e-24	+
Arteriolar Tortuosity	15	52152268	LEO1	GTEx/v8	Thyroid	ENSG00000166477	A	2.41151e-10	-0.152868	4.40179e-20	-
Arteriolar Tortuosity	3	20128811	KArteriolar Tortuosity2B	GTEx/v8	Thyroid	ENSG00000114166	G	2.48255e-10	0.526356	4.93834e-39	+
Arteriolar Tortuosity	19	46360520	DMPK	GTEx/v8	Artery_Tibial	ENSG00000104936	T	2.92758e-10	0.136791	2.43608e-13	+
Arteriolar Tortuosity	17	73917914	CDK3	GTEx/v8	Thyroid	ENSG00000250506	CACGGGG	2.99598e-10	-0.319785	7.19734e-50	+
Venular Width	15	54011110	WDR72	GTEx/v8	Artery_Aorta	ENSG00000166415	T	3.09987e-10	-0.437026	3.57485e-44	+
Arteriolar Tortuosity	14	105784927	BRF1	GTEx/v8	Thyroid	ENSG00000185024	T	3.16238e-10	0.217875	6.14328e-32	+
Arteriolar Tortuosity	15	52008565	DMXL2	GTEx/v8	Artery_Tibial	ENSG00000104093	A	3.42948e-10	-0.168943	3.7044e-11	+
Venular Tortuosity	9	125007893	RBM18	GTEx/v8	Nerve_Tibial	ENSG00000119446	T	3.52703e-10	0.158475	1.83675e-07	-
Arteriolar Tortuosity	1	150546120	FAM63A	GTEx/v8	Muscle_Skeletal	ENSG00000143409	A	3.54231e-10	-0.236649	3.23682e-08	-
Arteriolar Tortuosity	17	1935204	RTN4RL1	GTEx/v8	Heart_Left_Ventricle	ENSG00000185924	C	3.55728e-10	0.366574	7.66208e-07	+
Venular Width	15	89769905	RLBP1	GTEx/v8	Brain_Cortex	ENSG00000140522	C	4.37355e-10	0.300743	3.57168e-08	-
Arteriolar Tortuosity	5	77630854	SCAMP1	GTEx/v8	Esophagus_Muscularis	ENSG00000085365	A	4.38685e-10	-0.112242	1.9248e-06	NA
Arteriolar Tortuosity	15	52008565	SCG3	GTEx/v8	Brain_Cerebellar_Hemisphere	ENSG00000104112	A	4.87792e-10	-0.340575	1.67005e-17	+
Arteriolar Tortuosity	8	38081302	BAG4	GTEx/v8	Whole_Blood	ENSG00000156735	G	5.10878e-10	0.11734	1.67998e-06	-
Arteriolar Tortuosity	1	23289568	LUZP1	GTEx/v8	Nerve_Tibial	ENSG00000169641	C	5.31243e-10	0.178838	2.2077e-11	-
Arteriolar Tortuosity	1	153966081	RAB13	GTEx/v8	Adipose_Visceral_Omentum	ENSG00000143545	C	5.50621e-10	0.157856	2.90366e-06	+
Arteriolar Tortuosity	1	227183022	PSEN2	GTEx/v8	Whole_Blood	ENSG00000143801	T	5.87777e-10	0.195066	2.93648e-06	+
Arteriolar Tortuosity	1	110608419	ALX3	GTEx/v8	Brain_Cerebellum	ENSG00000156150	G	6.57229e-10	0.773186	5.86895e-06	-
Arteriolar Tortuosity	6	31872383	LY6G5C	GTEx/v8	Whole_Blood	ENSG00000204428	A	7.31459e-10	-0.38733	7.5722e-95	-
Venular Tortuosity	2	218680529	TNS1	GTEx/v8	Esophagus_Muscularis	ENSG00000079308	G	7.81707e-10	0.115956	3.63878e-08	NA
Arteriolar Tortuosity	6	31377662	NELFE	GTEx/v8	Testis	ENSG00000204356	C	1.02971e-09	-0.492191	1.62852e-05	-
Arteriolar Tortuosity	19	39256871	ECH1	GTEx/v8	Cells_EBV-transformed_lymphocytes	ENSG00000104823	T	1.13814e-09	0.368728	5.00339e-07	NA
Arteriolar Tortuosity	20	33801283	FAM83C	GTEx/v8	Skin_Not_Sun_Exposed_Suprapubic	ENSG00000125998	C	1.27951e-09	-0.249941	1.91911e-25	+
Arteriolar Tortuosity	17	74712310	METTL23	GTEx/v8	Cells_Cultured_fibroblasts	ENSG00000181038	G	1.4611e-09	0.171024	6.98041e-06	+
Arteriolar Tortuosity	12	79972614	PArteriolar WidthR	GTEx/v8	Esophagus_Muscularis	ENSG00000177425	A	1.5115e-09	-0.196369	9.2314e-07	NA
Arteriolar Tortuosity	22	38204089	BAIAP2L2	GTEx/v8	Esophagus_Mucosa	ENSG00000128298	T	1.53966e-09	-0.308999	1.0068e-75	-
Arteriolar Tortuosity	1	22283671	CELA3B	GTEx/v8	Pancreas	ENSG00000219073	T	1.62678e-09	-0.213697	6.06677e-08	+
Arteriolar Tortuosity	6	31330969	NOTCH4	GTEx/v8	Adipose_Subcutaneous	ENSG00000204301	A	1.9586e-09	-0.148245	9.69029e-43	+
Arteriolar Tortuosity	6	31572975	PPT2	GTEx/v8	Cells_Cultured_fibroblasts	ENSG00000221988	C	1.97557e-09	-0.354037	1.10928e-08	-
Arteriolar Tortuosity	17	57264660	GDPD1	GTEx/v8	Thyroid	ENSG00000153982	T	2.25753e-09	0.236774	4.08169e-06	NA
Venular Width	8	10637552	NEIL2	GTEx/v8	Heart_Arteriolar Tortuosityrial_Appendage	ENSG00000154328	A	2.27635e-09	-0.202911	2.37111e-21	NA
Arteriolar Tortuosity	6	31751588	AGER	GTEx/v8	Artery_Tibial	ENSG00000204305	A	2.50398e-09	0.282009	1.71707e-21	+
Venular Width	8	10700254	SOX7	GTEx/v8	Adipose_Subcutaneous	ENSG00000171056	C	2.51081e-09	-0.17451	1.68524e-08	+
Arteriolar Tortuosity	5	1099782	NKD2	GTEx/v8	Brain_Cortex	ENSG00000145506	T	2.79646e-09	0.416456	2.59454e-13	-
Arteriolar Tortuosity	2	11503455	ROCK2	GTEx/v8	Cells_Cultured_fibroblasts	ENSG00000134318	T	3.48948e-09	-0.331329	1.24574e-05	NA
Arteriolar Tortuosity	17	73850819	GALK1	GTEx/v8	Liver	ENSG00000108479	T	3.63189e-09	0.430548	1.2142e-14	-
Arteriolar Tortuosity	1	153797015	NUP210L	GTEx/v8	Esophagus_Muscularis	ENSG00000143552	A	3.74682e-09	0.395673	1.558e-33	+
Arteriolar Tortuosity	6	7276596	SSR1	GTEx/v8	Thyroid	ENSG00000124783	C	3.80285e-09	0.178231	1.61405e-06	+
Arteriolar Tortuosity	8	38201232	WHSC1L1	GTEx/v8	Nerve_Tibial	ENSG00000147548	T	3.84554e-09	-0.14088	9.00453e-06	+
Arteriolar Tortuosity	5	77630854	LHFPL2	GTEx/v8	Thyroid	ENSG00000145685	A	3.93444e-09	0.203042	2.37215e-24	NA
Arteriolar Tortuosity	22	18326823	MICAL3	GTEx/v8	Artery_Tibial	ENSG00000243156	C	4.01503e-09	0.149842	1.70892e-07	+
Venular Tortuosity	2	242255830	STK25	GTEx/v8	Colon_Transverse	ENSG00000115694	T	4.43283e-09	0.250854	3.69706e-09	-
Venular Width	8	10758496	MSRA	GTEx/v8	Skin_Sun_Exposed_Lower_leg	ENSG00000175806	A	4.76473e-09	-0.195576	6.45576e-10	-
Arteriolar Tortuosity	17	56847945	RNF43	GTEx/v8	Lung	ENSG00000108375	T	4.79924e-09	-0.160075	3.51085e-16	NA
Venular Tortuosity	19	38940082	SPINT2	GTEx/v8	Artery_Tibial	ENSG00000167642	T	4.81379e-09	-0.324364	1.56801e-22	+
Arteriolar Tortuosity	6	31815723	LSM2	GTEx/v8	Artery_Tibial	ENSG00000204392	T	5.52163e-09	-0.280482	3.77906e-10	NA
Arteriolar Tortuosity	9	136316942	CACFD1	GTEx/v8	Nerve_Tibial	ENSG00000160325	G	5.6689e-09	-0.240995	1.15343e-05	+
Venular Width	10	70012289	SLC25A16	GTEx/v8	Cells_Cultured_fibroblasts	ENSG00000122912	A	6.45897e-09	0.266422	1.59965e-13	+
Arteriolar Tortuosity	6	31582572	LY6G5B	GTEx/v8	Thyroid	ENSG00000240053	C	6.80144e-09	0.253531	7.95969e-38	+
Arteriolar Tortuosity	19	46160458	GIPR	GTEx/v8	Colon_Transverse	ENSG00000010310	G	7.24256e-09	-0.159476	5.01983e-05	-
Venular Width	6	142499401	Venular TortuosityA1	GTEx/v8	Adrenal_Gland	ENSG00000009844	A	7.71327e-09	-0.183482	5.37915e-05	-
Arteriolar Tortuosity	9	136237672	MED22	GTEx/v8	Whole_Blood	ENSG00000148297	A	8.71341e-09	0.127197	2.03754e-50	+
Arteriolar Tortuosity	8	109121945	RSPO2	GTEx/v8	Esophagus_Mucosa	ENSG00000147655	C	8.72414e-09	-0.267	5.17598e-10	-
Venular Tortuosity	19	38736485	YIF1B	GTEx/v8	Nerve_Tibial	ENSG00000167645	T	1.03817e-08	-0.140671	2.65728e-05	-
Venular Tortuosity	19	39454425	FBXO27	GTEx/v8	Cells_Cultured_fibroblasts	ENSG00000161243	A	1.05085e-08	0.266097	4.56901e-57	+
Arteriolar Tortuosity	9	136237672	SURF6	GTEx/v8	Whole_Blood	ENSG00000148296	A	1.17469e-08	0.212455	1.61537e-66	+
Arteriolar Tortuosity	8	38260440	LETM2	GTEx/v8	Adrenal_Gland	ENSG00000165046	T	1.19604e-08	0.382673	6.67793e-05	-
Arteriolar Tortuosity	15	74607433	CYP11A1	GTEx/v8	Lung	ENSG00000140459	G	1.20729e-08	0.295989	2.18458e-07	-
Arteriolar Tortuosity	1	153952598	TPM3	GTEx/v8	Whole_Blood	ENSG00000143549	G	1.2298e-08	0.0915316	7.14671e-10	NA
Venular Tortuosity	19	38931673	RASGRP4	GTEx/v8	Muscle_Skeletal	ENSG00000171777	A	1.25821e-08	0.274764	1.06724e-06	-
Arteriolar Tortuosity	1	110503296	CSF1	GTEx/v8	Esophagus_Mucosa	ENSG00000184371	C	1.29973e-08	-0.14222	4.87884e-05	+
Arteriolar Tortuosity	8	38847959	ADAM9	GTEx/v8	Muscle_Skeletal	ENSG00000168615	T	1.41964e-08	-0.147934	2.7078e-13	+
Arteriolar Tortuosity	1	22248881	USP48	GTEx/v8	Esophagus_Mucosa	ENSG00000090686	A	1.43696e-08	-0.151939	2.77868e-07	+
Arteriolar Tortuosity	22	38183382	GGA1	GTEx/v8	Whole_Blood	ENSG00000100083	T	1.49679e-08	-0.117441	4.64622e-34	-
Arteriolar Tortuosity	19	46269313	SIX5	GTEx/v8	Muscle_Skeletal	ENSG00000177045	C	1.52513e-08	-0.195371	4.85791e-05	+
Venular Tortuosity	1	6701534	DNAJC11	GTEx/v8	Artery_Tibial	ENSG00000007923	T	1.8117e-08	-0.165527	6.73501e-05	NA
Arteriolar Tortuosity	1	6701534	DNAJC11	GTEx/v8	Artery_Tibial	ENSG00000007923	T	1.8117e-08	-0.165527	6.73501e-05	+
Venular Width	19	49114236	SPHK2	GTEx/v8	Cells_Cultured_fibroblasts	ENSG00000063176	G	2.02655e-08	0.151098	4.47699e-22	-
Arteriolar Tortuosity	10	64882300	JMJD1C	GTEx/v8	Cells_Cultured_fibroblasts	ENSG00000171988	G	2.0696e-08	-0.139576	3.25692e-05	-
Venular Tortuosity	19	39449513	NFKBIB	GTEx/v8	Heart_Left_Ventricle	ENSG00000104825	A	2.12912e-08	0.140685	2.17401e-10	+
Venular Tortuosity	9	130341253	FAM129B	GTEx/v8	Cells_Cultured_fibroblasts	ENSG00000136830	G	2.13339e-08	-0.136924	4.12097e-07	NA
Arteriolar Tortuosity	4	8263567	SH3TC1	GTEx/v8	Lung	ENSG00000125089	A	2.22883e-08	0.191981	3.70251e-14	-
Arteriolar Tortuosity	19	39256871	ACTN4	GTEx/v8	Cells_Cultured_fibroblasts	ENSG00000130402	T	2.26555e-08	0.101838	3.60037e-11	NA
Arteriolar Tortuosity	4	169669361	PALLD	GTEx/v8	Thyroid	ENSG00000129116	A	2.29023e-08	-0.132557	4.73045e-05	-
Arteriolar Tortuosity	1	151010521	PRUNE	GTEx/v8	Esophagus_Muscularis	ENSG00000143363	C	2.29935e-08	-0.162559	1.49163e-09	NA
Arteriolar Tortuosity	8	109106801	EMC2	GTEx/v8	Artery_Tibial	ENSG00000104412	A	2.40688e-08	-0.144188	4.3248e-05	-
Arteriolar Tortuosity	15	75311036	CPLX3	GTEx/v8	Esophagus_Mucosa	ENSG00000213578	A	2.6002e-08	-0.265721	1.92934e-24	NA
Arteriolar Tortuosity	19	14571966	DNAJB1	GTEx/v8	Skin_Not_Sun_Exposed_Suprapubic	ENSG00000132002	G	2.99292e-08	-0.225387	1.01231e-11	NA
Venular Tortuosity	2	134305108	NCKAP5	GTEx/v8	Testis	ENSG00000176771	T	3.11147e-08	0.355577	2.69163e-05	-
Arteriolar Tortuosity	2	134305108	NCKAP5	GTEx/v8	Testis	ENSG00000176771	T	3.11147e-08	0.355577	2.69163e-05	NA
Arteriolar Tortuosity	7	45229316	RAMP3	GTEx/v8	Lung	ENSG00000122679	A	3.14876e-08	0.188137	3.05522e-05	NA
Venular Width	8	11444837	SLC35G5	GTEx/v8	Lung	ENSG00000177710	T	4.43328e-08	-0.213698	1.74451e-05	-
Arteriolar Tortuosity	15	75459903	SNUPN	GTEx/v8	Testis	ENSG00000169371	A	5.07494e-08	-0.242596	7.35084e-51	+
Venular Tortuosity	9	130493513	C9orf117	GTEx/v8	Brain_Cerebellum	ENSG00000160401	G	5.26787e-08	-0.406066	0.000172616	+
Arteriolar Tortuosity	9	130493513	C9orf117	GTEx/v8	Brain_Cerebellum	ENSG00000160401	G	5.26787e-08	-0.406066	0.000172616	+
Arteriolar Tortuosity	17	1929717	DPH1	GTEx/v8	Whole_Blood	ENSG00000108963	T	5.53426e-08	-0.105297	8.23168e-13	NA
Arteriolar Tortuosity	22	38179120	PICK1	GTEx/v8	Skin_Sun_Exposed_Lower_leg	ENSG00000100151	A	5.56035e-08	-0.134773	1.57521e-23	-
Venular Tortuosity	9	130404935	FAM102A	GTEx/v8	Nerve_Tibial	ENSG00000167106	C	6.27402e-08	-0.187093	0.000104483	-
Arteriolar Tortuosity	1	170387565	GORAB	GTEx/v8	Heart_Arteriolar Tortuosityrial_Appendage	ENSG00000120370	A	6.6593e-08	-0.234192	3.31044e-08	+
Arteriolar Tortuosity	19	38905239	CArteriolar TortuositySPERG	GTEx/v8	Whole_Blood	ENSG00000099338	T	6.95139e-08	0.298316	5.85182e-43	+
Arteriolar Tortuosity	3	123756805	KALRN	GTEx/v8	Cells_Cultured_fibroblasts	ENSG00000160145	A	7.11836e-08	0.324152	1.68322e-06	-
Arteriolar Tortuosity	18	20575123	RBBP8	GTEx/v8	Brain_Cerebellum	ENSG00000101773	T	7.31921e-08	-0.367495	0.000163952	+
Arteriolar Tortuosity	1	153797015	S100A16	GTEx/v8	Brain_Cerebellum	ENSG00000188643	A	7.53816e-08	-0.385917	1.55135e-35	-
Venular Tortuosity	19	39110649	ACTN4	GTEx/v8	Adipose_Subcutaneous	ENSG00000130402	G	7.98529e-08	-0.159925	1.45322e-11	NA
Arteriolar Tortuosity	2	242212917	BOK	GTEx/v8	Cells_Cultured_fibroblasts	ENSG00000176720	A	8.03768e-08	0.197711	4.44934e-19	-
Arteriolar Tortuosity	9	130334178	FAM129B	GTEx/v8	Cells_Cultured_fibroblasts	ENSG00000136830	T	8.26966e-08	-0.116643	4.12097e-07	NA
Arteriolar Tortuosity	5	52153756	ITGA1	GTEx/v8	Artery_Tibial	ENSG00000213949	C	8.46813e-08	0.129328	0.000163924	+
Arteriolar Tortuosity	9	130347118	RPL12	GTEx/v8	Skin_Sun_Exposed_Lower_leg	ENSG00000197958	T	8.50802e-08	-0.183143	2.98672e-77	+
Arteriolar Tortuosity	4	120136135	RP11-455G16.1	GTEx/v8	Cells_Cultured_fibroblasts	ENSG00000178636	A	8.78327e-08	-0.199542	6.45064e-05	NA
Arteriolar Tortuosity	1	23289278	C1orf213	GTEx/v8	Testis	ENSG00000249087	T	9.0747e-08	0.238302	5.23456e-13	-
Arteriolar Tortuosity	1	23284425	TCEA3	GTEx/v8	Muscle_Skeletal	ENSG00000204219	A	9.36374e-08	0.108767	2.63577e-17	-
Arteriolar Width	12	7057437	LRRC23	GTEx/v8	Thyroid	ENSG00000010626	T	9.36447e-08	0.290562	4.0278e-68	+
Arteriolar Tortuosity	6	31347980	TCF19	GTEx/v8	Colon_Transverse	ENSG00000137310	T	9.38431e-08	0.130911	5.08397e-07	-
Venular Tortuosity	1	6680907	PHF13	GTEx/v8	Whole_Blood	ENSG00000116273	A	1.00456e-07	0.127441	3.76497e-23	NA
Arteriolar Tortuosity	1	6680907	PHF13	GTEx/v8	Whole_Blood	ENSG00000116273	A	1.00456e-07	0.127441	3.76497e-23	NA
Arteriolar Tortuosity	14	65165090	ZBTB1	GTEx/v8	Skin_Sun_Exposed_Lower_leg	ENSG00000126804	C	1.02936e-07	-0.161669	1.53091e-37	+
Arteriolar Tortuosity	14	106078447	C14orf80	GTEx/v8	Skin_Not_Sun_Exposed_Suprapubic	ENSG00000185347	T	1.09895e-07	-0.160034	2.13493e-06	-
Arteriolar Tortuosity	15	52376691	BCL2L10	GTEx/v8	Skin_Sun_Exposed_Lower_leg	ENSG00000137875	A	1.15028e-07	0.132415	7.73228e-05	-
Venular Tortuosity	9	100304531	TMOD1	GTEx/v8	Ovary	ENSG00000136842	G	1.23963e-07	-0.320913	0.00120916	-
Venular Width	8	11086942	C8orf12	GTEx/v8	Pancreas	ENSG00000184608	C	1.24823e-07	-0.342473	1.86718e-33	+
Venular Tortuosity	2	218685627	DIRC3	GTEx/v8	Artery_Aorta	ENSG00000231672	C	1.39562e-07	0.232603	5.41001e-17	-
Arteriolar Tortuosity	15	74595901	CYP1A1	GTEx/v8	Adipose_Visceral_Omentum	ENSG00000140465	C	1.41482e-07	-0.340239	1.27665e-06	+
Arteriolar Tortuosity	1	183692426	RGL1	GTEx/v8	Esophagus_Mucosa	ENSG00000143344	G	1.42203e-07	-0.148162	0.000247061	+
Venular Tortuosity	1	227456849	ADCK3	GTEx/v8	Whole_Blood	ENSG00000163050	G	1.57707e-07	-0.20404	1.55548e-70	+
Arteriolar Tortuosity	11	8871302	ST5	GTEx/v8	Nerve_Tibial	ENSG00000166444	G	1.66665e-07	-0.220711	6.9355e-05	+
Venular Tortuosity	2	242322586	BOK	GTEx/v8	Cells_Cultured_fibroblasts	ENSG00000176720	A	1.77416e-07	0.175755	4.44934e-19	-
Arteriolar Tortuosity	14	105784927	BTBD6	GTEx/v8	Artery_Tibial	ENSG00000184887	T	1.77686e-07	-0.191289	3.70551e-17	-
Arteriolar Tortuosity	19	39053282	C19orf33	GTEx/v8	Skin_Sun_Exposed_Lower_leg	ENSG00000167644	T	1.78302e-07	-0.152974	2.43618e-62	-
Arteriolar Tortuosity	20	33741570	MAP1LC3A	GTEx/v8	Esophagus_Gastroesophageal_Junction	ENSG00000101460	A	1.85479e-07	0.322402	3.92876e-13	-
Arteriolar Tortuosity	2	242422405	ING5	GTEx/v8	Thyroid	ENSG00000168395	A	2.03981e-07	0.187802	1.82239e-68	NA
Venular Width	19	49252679	FUT1	GTEx/v8	Adipose_Subcutaneous	ENSG00000174951	C	2.09457e-07	-0.183531	6.71679e-11	+
Arteriolar Tortuosity	1	150231989	APH1A	GTEx/v8	Muscle_Skeletal	ENSG00000117362	A	2.16587e-07	-0.162489	0.000262983	-
Arteriolar Tortuosity	15	52381153	GNB5	GTEx/v8	Skin_Sun_Exposed_Lower_leg	ENSG00000069966	G	2.25238e-07	0.172993	1.98172e-16	-
Arteriolar Tortuosity	1	153797015	S100A13	GTEx/v8	Colon_Sigmoid	ENSG00000189171	A	2.34912e-07	-0.302681	7.67329e-45	-
Arteriolar Tortuosity	6	31449522	FLOT1	GTEx/v8	Thyroid	ENSG00000137312	T	2.39128e-07	-0.237652	3.44838e-30	-
Arteriolar Tortuosity	1	110482691	STRIP1	GTEx/v8	Nerve_Tibial	ENSG00000143093	T	2.55764e-07	-0.166337	2.2949e-05	+
Arteriolar Tortuosity	19	39256871	RINL	GTEx/v8	Skin_Not_Sun_Exposed_Suprapubic	ENSG00000187994	T	2.6763e-07	-0.214923	0.000431636	NA
Arteriolar Tortuosity	19	46359553	FOXA3	GTEx/v8	Minor_Salivary_Gland	ENSG00000170608	G	2.82598e-07	0.305072	0.00371819	+
Venular Tortuosity	1	6695331	ZBTB48	GTEx/v8	Nerve_Tibial	ENSG00000204859	T	2.8726e-07	-0.107825	0.000601231	NA
Arteriolar Tortuosity	1	6695331	ZBTB48	GTEx/v8	Nerve_Tibial	ENSG00000204859	T	2.8726e-07	-0.107825	0.000601231	+
Arteriolar Tortuosity	6	31496467	Arteriolar TortuosityF6B	GTEx/v8	Cells_Cultured_fibroblasts	ENSG00000213676	A	2.90817e-07	0.344431	8.61443e-53	NA
Venular Tortuosity	17	1970201	HIC1	GTEx/v8	Testis	ENSG00000177374	A	2.93415e-07	0.192598	1.91122e-05	-
Arteriolar Tortuosity	10	105617908	SH3PXD2A	GTEx/v8	Whole_Blood	ENSG00000107957	C	2.93616e-07	-0.153473	0.000541398	+
Arteriolar Tortuosity	1	92328595	TGFBR3	GTEx/v8	Skin_Sun_Exposed_Lower_leg	ENSG00000069702	C	2.95216e-07	0.1009	0.000314005	NA
Arteriolar Tortuosity	14	76362572	TGFB3	GTEx/v8	Esophagus_Mucosa	ENSG00000119699	CTG	3.43177e-07	0.235144	1.48756e-10	NA
Arteriolar Tortuosity	6	31449522	DDX39B	GTEx/v8	Testis	ENSG00000198563	T	3.52712e-07	0.173136	0.00142589	+
Arteriolar Tortuosity	12	20760410	PDE3A	GTEx/v8	Cells_Cultured_fibroblasts	ENSG00000172572	A	3.79089e-07	-0.127015	0.000251583	+
Venular Tortuosity	17	1995211	DPH1	GTEx/v8	Testis	ENSG00000108963	T	3.96278e-07	-0.274186	9.62784e-19	+
Venular Tortuosity	19	39369369	SIRT2	GTEx/v8	Whole_Blood	ENSG00000068903	G	4.07883e-07	0.0948829	0.000880618	NA
Arteriolar Tortuosity	14	61008596	PCNXL4	GTEx/v8	Artery_Tibial	ENSG00000126773	C	4.25603e-07	-0.147719	2.23823e-14	+
Venular Width	10	70008028	KIAA1279	GTEx/v8	Muscle_Skeletal	ENSG00000198954	T	4.44333e-07	0.261904	4.93217e-103	+
Venular Tortuosity	17	70385430	SOX9	GTEx/v8	Thyroid	ENSG00000125398	G	4.76098e-07	-0.155207	1.97645e-09	-
Arteriolar Tortuosity	11	8859384	TRIM66	GTEx/v8	Adipose_Subcutaneous	ENSG00000166436	A	4.78385e-07	0.20678	1.10218e-91	+
Venular Width	19	39240269	LGALS4	GTEx/v8	Thyroid	ENSG00000171747	C	5.20918e-07	-0.190904	1.08539e-08	-
Arteriolar Tortuosity	6	31349242	CYP21A2	GTEx/v8	Skin_Not_Sun_Exposed_Suprapubic	ENSG00000231852	A	5.30139e-07	0.312175	4.34325e-19	NA
Arteriolar Tortuosity	17	75316880	SEPTIN9	GTEx/v8	Muscle_Skeletal	ENSG00000184640	G	5.35996e-07	-0.128446	0.00143136	+
Arteriolar Tortuosity	17	1991460	HIC1	GTEx/v8	Testis	ENSG00000177374	G	5.4718e-07	0.192593	1.91122e-05	NA
Arteriolar Tortuosity	22	36038076	RBFOX2	GTEx/v8	Artery_Tibial	ENSG00000100320	T	5.67205e-07	-0.113988	4.92534e-06	-
Arteriolar Tortuosity	22	38179120	ANKRD54	GTEx/v8	Pancreas	ENSG00000100124	A	5.77251e-07	-0.251458	4.46349e-07	-
Venular Width	8	11024663	USP17L2	GTEx/v8	Nerve_Tibial	ENSG00000223443	A	7.98179e-07	0.269879	1.09821e-06	-
Arteriolar Tortuosity	19	39281540	SPINT2	GTEx/v8	Artery_Tibial	ENSG00000167642	A	8.74747e-07	-0.211976	1.56801e-22	NA
Arteriolar Tortuosity	1	153758562	S100A14	GTEx/v8	Thyroid	ENSG00000189334	CTGGTACTACAGGCGTG	9.00541e-07	0.160074	5.71047e-48	+
Arteriolar Tortuosity	2	218529842	DIRC3	GTEx/v8	Skin_Sun_Exposed_Lower_leg	ENSG00000231672	C	9.13448e-07	0.468315	1.61081e-29	NA
Arteriolar Tortuosity	15	52335166	MYO5A	GTEx/v8	Lung	ENSG00000197535	A	9.79942e-07	0.171506	5.51249e-07	-
Arteriolar Tortuosity	15	75287822	MAN2C1	GTEx/v8	Esophagus_Muscularis	ENSG00000140400	A	9.94603e-07	-0.217466	3.35244e-138	+
Arteriolar Tortuosity	11	8877704	SCUBE2	GTEx/v8	Thyroid	ENSG00000175356	C	1.00602e-06	-0.236016	2.40802e-12	+
Venular Width	8	10808687	XKR6	GTEx/v8	Thyroid	ENSG00000171044	T	1.00981e-06	0.219715	1.81422e-05	-
Arteriolar Tortuosity	19	46206425	C19orf83	GTEx/v8	Cells_Cultured_fibroblasts	ENSG00000267757	C	1.03485e-06	0.35946	8.50212e-83	+
Venular Width	8	11444837	RP11-297N6.4	GTEx/v8	Heart_Arteriolar Tortuosityrial_Appendage	ENSG00000255046	T	1.11939e-06	-0.344803	5.37179e-09	-
Arteriolar Tortuosity	15	75443319	NEIL1	GTEx/v8	Esophagus_Muscularis	ENSG00000140398	CA	1.12753e-06	0.0956254	5.99391e-08	NA
Arteriolar Tortuosity	4	120656656	PDE5A	GTEx/v8	Nerve_Tibial	ENSG00000138735	C	1.12837e-06	0.079526	0.00147366	+
Arteriolar Tortuosity	22	40959260	MCHR1	GTEx/v8	Whole_Blood	ENSG00000128285	G	1.14152e-06	0.260922	1.52833e-05	-
Arteriolar Tortuosity	22	40886557	ADSL	GTEx/v8	Muscle_Skeletal	ENSG00000239900	C	1.17646e-06	-0.0846281	3.98692e-10	+
Arteriolar Tortuosity	1	201884952	TIMM17A	GTEx/v8	Esophagus_Gastroesophageal_Junction	ENSG00000134375	C	1.23315e-06	0.156109	6.54815e-31	NA
Venular Tortuosity	1	227402577	PSEN2	GTEx/v8	Cells_Cultured_fibroblasts	ENSG00000143801	G	1.26019e-06	-0.215565	4.576e-74	+
Arteriolar Tortuosity	22	38204089	SLC16A8	GTEx/v8	Nerve_Tibial	ENSG00000100156	T	1.2955e-06	-0.172353	1.01212e-25	-
Arteriolar Tortuosity	6	31751588	C6orf25	GTEx/v8	Esophagus_Mucosa	ENSG00000204420	A	1.35824e-06	-0.327333	3.85394e-15	-
Arteriolar Tortuosity	5	52163105	PELO	GTEx/v8	Thyroid	ENSG00000152684	A	1.39771e-06	0.196891	0.00156665	+
Arteriolar Tortuosity	17	57210069	MTMR4	GTEx/v8	Minor_Salivary_Gland	ENSG00000108389	G	1.40424e-06	-0.32201	0.0083578	+
Arteriolar Tortuosity	6	31349242	C4B	GTEx/v8	Nerve_Tibial	ENSG00000224389	A	1.44029e-06	-0.205534	2.74906e-07	NA
Arteriolar Tortuosity	1	941334	KLHL17	GTEx/v8	Artery_Tibial	ENSG00000187961	A	1.47793e-06	0.103674	1.92079e-07	+
Arteriolar Tortuosity	17	1963961	SMG6	GTEx/v8	Brain_Cortex	ENSG00000070366	A	1.51007e-06	0.242012	0.00728555	+
Arteriolar Tortuosity	22	38204089	C22orf23	GTEx/v8	Artery_Tibial	ENSG00000128346	T	1.56596e-06	-0.174872	2.67125e-06	-
Arteriolar Tortuosity	6	31347930	LST1	GTEx/v8	Adipose_Subcutaneous	ENSG00000204482	T	1.60574e-06	0.125425	0.00114697	-
Arteriolar Tortuosity	17	57263393	SMG8	GTEx/v8	Esophagus_Mucosa	ENSG00000167447	G	1.65273e-06	0.128446	5.00921e-10	-
Arteriolar Tortuosity	17	57273681	PRR11	GTEx/v8	Esophagus_Mucosa	ENSG00000068489	T	1.70431e-06	0.0953623	0.00137839	-
Arteriolar Tortuosity	1	23289568	ZNF436	GTEx/v8	Skin_Sun_Exposed_Lower_leg	ENSG00000125945	C	1.71672e-06	-0.199944	1.75795e-91	+
Arteriolar Tortuosity	15	75329091	LMAN1L	GTEx/v8	Esophagus_Mucosa	ENSG00000140506	C	1.75875e-06	0.199318	7.10911e-20	NA
Venular Tortuosity	9	130183114	GARNL3	GTEx/v8	Nerve_Tibial	ENSG00000136895	C	1.79842e-06	-0.135713	3.18219e-09	-
Arteriolar Tortuosity	1	150278389	VPS45	GTEx/v8	Colon_Sigmoid	ENSG00000136631	T	1.87337e-06	-0.227257	0.00288908	NA
Venular Tortuosity	5	89776719	GPR98	GTEx/v8	Pancreas	ENSG00000164199	T	2.03286e-06	1.37695	1.2538e-10	+
Arteriolar Tortuosity	9	130527786	FAM102A	GTEx/v8	Nerve_Tibial	ENSG00000167106	A	2.04593e-06	0.0956536	0.000104483	NA
Arteriolar Tortuosity	20	33694210	MYH7B	GTEx/v8	Nerve_Tibial	ENSG00000078814	G	2.229e-06	0.145487	1.92074e-19	-
Arteriolar Tortuosity	1	201880296	RNPEP	GTEx/v8	Esophagus_Mucosa	ENSG00000176393	C	2.34903e-06	-0.176144	2.8766e-26	NA
Arteriolar Tortuosity	5	132073658	CCNI2	GTEx/v8	Brain_CaudArteriolar Tortuositye_basal_ganglia	ENSG00000205089	G	2.39497e-06	-0.556106	0.00647159	-
Arteriolar Tortuosity	6	31240959	GPANK1	GTEx/v8	Skin_Sun_Exposed_Lower_leg	ENSG00000204438	G	2.48529e-06	0.122876	0.0010355	-
Arteriolar Tortuosity	17	73825463	UBALD2	GTEx/v8	Brain_Hypothalamus	ENSG00000185262	C	2.49597e-06	-0.23563	0.0171392	+
Arteriolar Tortuosity	8	109182244	EIF3E	GTEx/v8	Muscle_Skeletal	ENSG00000104408	C	2.50879e-06	-0.0995982	1.68404e-07	-
Arteriolar Tortuosity	22	40820151	FAM83F	GTEx/v8	Testis	ENSG00000133477	C	2.56841e-06	0.160325	6.86217e-21	-
Arteriolar Tortuosity	1	151054180	SELENBP1	GTEx/v8	Thyroid	ENSG00000143416	A	2.7612e-06	-0.172866	2.54238e-67	-
Arteriolar Tortuosity	20	33799176	MMP24	GTEx/v8	Skin_Not_Sun_Exposed_Suprapubic	ENSG00000125966	C	2.79891e-06	-0.338179	0.000417204	+
Arteriolar Tortuosity	9	130561067	AK1	GTEx/v8	Stomach	ENSG00000106992	T	2.83201e-06	-0.175065	0.00327318	-
Arteriolar Tortuosity	6	31358450	AGPArteriolar Tortuosity1	GTEx/v8	Nerve_Tibial	ENSG00000204310	A	2.87792e-06	0.138457	2.08376e-10	-
Arteriolar Tortuosity	15	75357340	CSK	GTEx/v8	Adipose_Subcutaneous	ENSG00000103653	G	2.89171e-06	0.15393	2.77869e-05	+
Arteriolar Tortuosity	22	41013489	XPNPEP3	GTEx/v8	Lung	ENSG00000196236	A	2.95215e-06	-0.133206	3.18076e-28	+
Arteriolar Tortuosity	1	3264297	MEGF6	GTEx/v8	Esophagus_Mucosa	ENSG00000162591	G	3.03185e-06	0.168815	4.69239e-06	NA
Arteriolar Tortuosity	6	39860093	DAAM2	GTEx/v8	Artery_Tibial	ENSG00000146122	T	3.06085e-06	-0.102603	5.41314e-07	+
Arteriolar Tortuosity	11	70063449	FADD	GTEx/v8	Whole_Blood	ENSG00000168040	C	3.38053e-06	-0.127741	0.00303998	-
Arteriolar Tortuosity	1	150482255	MTMR11	GTEx/v8	Pancreas	ENSG00000014914	G	3.54133e-06	0.298283	5.73599e-09	NA
Arteriolar Tortuosity	16	75499446	ZFP1	GTEx/v8	Adipose_Subcutaneous	ENSG00000184517	C	3.61109e-06	-0.210221	9.45478e-37	NA
Arteriolar Tortuosity	1	153797015	HAX1	GTEx/v8	Muscle_Skeletal	ENSG00000143575	A	3.63143e-06	-0.0952923	1.44706e-05	-
Arteriolar Tortuosity	13	111175419	CARS2	GTEx/v8	Artery_Aorta	ENSG00000134905	T	3.6603e-06	0.321274	3.74695e-24	+
Arteriolar Tortuosity	4	8304137	ACOX3	GTEx/v8	Adipose_Subcutaneous	ENSG00000087008	A	3.71953e-06	-0.208743	1.36452e-12	+
Arteriolar Tortuosity	14	105927433	CRIP2	GTEx/v8	Whole_Blood	ENSG00000182809	C	3.76348e-06	-0.135283	0.000362814	+
Arteriolar Tortuosity	6	31349242	DDR1	GTEx/v8	Whole_Blood	ENSG00000204580	A	3.83768e-06	0.174808	1.61006e-14	NA
Venular Tortuosity	19	38733643	KCNK6	GTEx/v8	Testis	ENSG00000099337	A	3.87162e-06	0.252515	4.8552e-07	+
Arteriolar Tortuosity	1	227958225	SNAP47	GTEx/v8	Esophagus_Mucosa	ENSG00000143740	C	3.93097e-06	0.278374	9.84034e-10	+
Arteriolar Tortuosity	2	218577813	ZNF142	GTEx/v8	Skin_Sun_Exposed_Lower_leg	ENSG00000115568	A	3.96465e-06	0.178005	3.21345e-10	NA
Arteriolar Tortuosity	19	46359553	DMWD	GTEx/v8	Muscle_Skeletal	ENSG00000185800	G	4.03487e-06	-0.103518	0.000626772	-
Arteriolar Tortuosity	8	38272542	C8orf86	GTEx/v8	Brain_Anterior_cingulArteriolar Tortuositye_cortex_BA24	ENSG00000196166	G	4.07048e-06	-0.590929	0.011988	+
Arteriolar Tortuosity	6	31347980	SFTA2	GTEx/v8	Thyroid	ENSG00000196260	T	4.10011e-06	0.179706	3.67753e-17	-
Arteriolar Tortuosity	9	130478653	STXBP1	GTEx/v8	Artery_Tibial	ENSG00000136854	A	4.49411e-06	0.104185	0.00548144	-
Arteriolar Tortuosity	5	132063560	P4HA2	GTEx/v8	Thyroid	ENSG00000072682	T	4.56517e-06	-0.182939	1.47413e-62	-
Arteriolar Tortuosity	1	150616117	ENSA	GTEx/v8	Brain_CaudArteriolar Tortuositye_basal_ganglia	ENSG00000143420	T	4.74653e-06	-0.34869	0.00907954	+
Arteriolar Tortuosity	6	39822183	LRFN2	GTEx/v8	Esophagus_Mucosa	ENSG00000156564	C	4.80172e-06	0.243381	0.00722052	+
Arteriolar Tortuosity	19	39053282	RYR1	GTEx/v8	Artery_Tibial	ENSG00000196218	T	4.87037e-06	-0.214905	0.00535601	-
Arteriolar Tortuosity	6	31409578	MDC1	GTEx/v8	Thyroid	ENSG00000137337	T	4.87466e-06	-0.398266	0.000255404	-
Arteriolar Tortuosity	14	105887452	CRIP1	GTEx/v8	Cells_Cultured_fibroblasts	ENSG00000213145	TGG	4.87948e-06	0.166102	0.000470035	NA
Arteriolar Tortuosity	4	84920560	NKX6-1	GTEx/v8	Artery_Tibial	ENSG00000163623	C	4.93406e-06	0.262624	1.46767e-17	NA
Arteriolar Tortuosity	6	31349720	CLIC1	GTEx/v8	Testis	ENSG00000213719	T	4.94125e-06	-0.177021	9.64035e-06	+
Arteriolar Tortuosity	16	75519917	CHST6	GTEx/v8	Spleen	ENSG00000183196	A	5.14944e-06	0.433564	3.7534e-08	+
Arteriolar Tortuosity	1	201872264	IPO9	GTEx/v8	Artery_Aorta	ENSG00000198700	T	5.23017e-06	0.127401	0.0121043	NA
Arteriolar Tortuosity	1	22238775	HSPG2	GTEx/v8	Breast_Mammary_Tissue	ENSG00000142798	G	5.4641e-06	0.118397	3.78838e-11	+
Arteriolar Tortuosity	14	106134806	PLD4	GTEx/v8	ProstArteriolar Tortuositye	ENSG00000166428	A	5.49404e-06	-0.255388	0.0197128	-
Arteriolar Tortuosity	1	150483840	MCL1	GTEx/v8	Whole_Blood	ENSG00000143384	T	5.53546e-06	0.0726177	2.4887e-10	NA
Arteriolar Tortuosity	11	8833359	RIC3	GTEx/v8	Skin_Sun_Exposed_Lower_leg	ENSG00000166405	T	5.56043e-06	-0.131364	4.75055e-28	+
Arteriolar Width	6	108549434	SNX3	GTEx/v8	Heart_Left_Ventricle	ENSG00000112335	A	5.61928e-06	-0.338393	0.000776446	-
Arteriolar Tortuosity	6	31582572	DDAH2	GTEx/v8	Esophagus_Mucosa	ENSG00000213722	C	5.6201e-06	-0.244391	0.00025957	-
Venular Width	19	49209851	PLA2G4C	GTEx/v8	Colon_Sigmoid	ENSG00000105499	G	5.66347e-06	-0.239821	6.55759e-11	NA
Venular Tortuosity	1	6792660	KLHL21	GTEx/v8	Heart_Left_Ventricle	ENSG00000162413	T	5.72611e-06	-0.183334	0.00146546	+
Arteriolar Tortuosity	1	23289278	C1orf234	GTEx/v8	Testis	ENSG00000227868	T	5.7481e-06	0.123805	5.64632e-05	-
Venular Tortuosity	9	124999952	MRRF	GTEx/v8	Brain_Cortex	ENSG00000148187	C	5.97606e-06	0.249521	0.0153442	-
Arteriolar Tortuosity	15	75460382	C15orf39	GTEx/v8	Adrenal_Gland	ENSG00000167173	G	6.19751e-06	-0.216656	0.0144264	+
Arteriolar Tortuosity	1	91961114	HFM1	GTEx/v8	Nerve_Tibial	ENSG00000162669	C	6.29581e-06	0.310544	6.8133e-58	NA
Arteriolar Tortuosity	1	153760104	S100A8	GTEx/v8	Skin_Sun_Exposed_Lower_leg	ENSG00000143546	A	6.33906e-06	0.175448	0.00536042	+
Arteriolar Tortuosity	4	8306428	TRMT44	GTEx/v8	Artery_Tibial	ENSG00000155275	A	6.45307e-06	0.184326	1.12602e-12	NA
Arteriolar Tortuosity	20	33515788	GGT7	GTEx/v8	Whole_Blood	ENSG00000131067	T	6.5082e-06	-0.15789	1.40796e-07	+
Arteriolar Tortuosity	15	52335166	TNFAIP8L3	GTEx/v8	Brain_CaudArteriolar Tortuositye_basal_ganglia	ENSG00000183578	A	6.57682e-06	0.265804	0.0129775	-
Arteriolar Tortuosity	2	242162191	PASK	GTEx/v8	Thyroid	ENSG00000115687	G	6.71529e-06	-0.221151	5.28275e-28	+
Arteriolar Tortuosity	14	76175594	C14orf1	GTEx/v8	Whole_Blood	ENSG00000133935	A	6.80155e-06	0.117149	0.00437943	-
Venular Width	8	10903475	PRSS55	GTEx/v8	Brain_Cerebellar_Hemisphere	ENSG00000184647	A	7.1311e-06	0.446784	2.50111e-21	-
Arteriolar Tortuosity	6	31496467	LTA	GTEx/v8	Testis	ENSG00000226979	A	7.32089e-06	-0.371142	3.09468e-07	NA
Arteriolar Tortuosity	6	31347980	ABCF1	GTEx/v8	Esophagus_Gastroesophageal_Junction	ENSG00000204574	T	7.3335e-06	0.106438	1.27456e-08	-
Arteriolar Tortuosity	15	75436123	EDC3	GTEx/v8	Adipose_Subcutaneous	ENSG00000179151	G	7.35199e-06	-0.1545	2.64973e-05	NA
Arteriolar Width	12	7062391	ENO2	GTEx/v8	Esophagus_Gastroesophageal_Junction	ENSG00000111674	G	7.36939e-06	-0.324517	3.73276e-09	-
Arteriolar Tortuosity	1	23289278	HTR1D	GTEx/v8	Brain_Frontal_Cortex_BA9	ENSG00000179546	T	7.42488e-06	0.444426	1.44834e-06	-
Arteriolar Tortuosity	13	111039784	TEX29	GTEx/v8	Brain_Frontal_Cortex_BA9	ENSG00000153495	C	7.51422e-06	0.424514	1.54273e-12	-
Arteriolar Tortuosity	19	14590919	PTGER1	GTEx/v8	Lung	ENSG00000160951	A	7.60188e-06	-0.207796	3.44509e-07	-
Venular Width	21	39871042	ERG	GTEx/v8	Nerve_Tibial	ENSG00000157554	G	7.6037e-06	-0.118107	0.00932265	+
Arteriolar Tortuosity	17	68405068	KCNJ2	GTEx/v8	Brain_Nucleus_accumbens_basal_ganglia	ENSG00000123700	G	7.6221e-06	0.261436	0.0207315	NA
Venular Width	6	142415136	GPR126	GTEx/v8	Pancreas	ENSG00000112414	T	7.80168e-06	0.269338	4.16433e-06	-
Venular Width	8	11447093	FAM86B1	GTEx/v8	Cells_EBV-transformed_lymphocytes	ENSG00000186523	A	8.06282e-06	0.535719	9.33052e-06	-
Arteriolar Tortuosity	1	150470523	ADAMTSL4-AS1	GTEx/v8	Nerve_Tibial	ENSG00000203804	T	8.07555e-06	-0.295939	0.00556923	NA
Arteriolar Tortuosity	6	31572975	PRRC2A	GTEx/v8	Testis	ENSG00000204469	C	8.10936e-06	0.221464	6.80816e-11	+
Arteriolar Tortuosity	6	31000489	RPP21	GTEx/v8	ProstArteriolar Tortuositye	ENSG00000241370	C	8.22692e-06	-0.82707	0.0349559	-
Arteriolar Tortuosity	1	150906995	CGN	GTEx/v8	Minor_Salivary_Gland	ENSG00000143375	G	8.30955e-06	-0.527344	0.0289949	+
Arteriolar Tortuosity	5	132119157	SLC22A5	GTEx/v8	Skin_Sun_Exposed_Lower_leg	ENSG00000197375	T	8.31861e-06	0.209948	2.13089e-51	+
Venular Tortuosity	9	130515317	SH2D3C	GTEx/v8	Cells_EBV-transformed_lymphocytes	ENSG00000095370	A	8.39926e-06	-0.399553	0.033168	-
Arteriolar Tortuosity	9	130372487	SH2D3C	GTEx/v8	Whole_Blood	ENSG00000095370	C	8.45049e-06	-0.0645455	0.00933919	NA
Arteriolar Tortuosity	4	1794188	SLBP	GTEx/v8	Brain_Cortex	ENSG00000163950	C	8.51914e-06	0.22197	0.0172416	+
Arteriolar Tortuosity	19	39260433	FBXO17	GTEx/v8	Nerve_Tibial	ENSG00000269190	T	8.56428e-06	-0.265588	8.5064e-37	-
Arteriolar Tortuosity	16	14058621	PLA2G10	GTEx/v8	Testis	ENSG00000069764	G	8.59175e-06	-0.266214	0.0111336	-
Arteriolar Tortuosity	6	31343905	HSPA1L	GTEx/v8	Brain_Cerebellar_Hemisphere	ENSG00000204390	CT	8.65122e-06	-0.849934	0.0017958	-
Arteriolar Tortuosity	1	6683240	KLHL21	GTEx/v8	Heart_Left_Ventricle	ENSG00000162413	A	8.68208e-06	-0.170159	0.00146546	+
Venular Tortuosity	15	77909965	SCAPER	GTEx/v8	Brain_Anterior_cingulArteriolar Tortuositye_cortex_BA24	ENSG00000140386	C	8.79663e-06	0.254713	0.00768355	NA
Arteriolar Tortuosity	17	73890363	ACOX1	GTEx/v8	Thyroid	ENSG00000161533	A	8.82951e-06	0.149666	3.16144e-10	-
Arteriolar Tortuosity	14	65214652	HSPA2	GTEx/v8	Muscle_Skeletal	ENSG00000126803	A	8.95186e-06	-0.206364	2.43579e-14	+
Arteriolar Tortuosity	1	22273045	WNT4	GTEx/v8	Thyroid	ENSG00000162552	A	9.26979e-06	-0.179716	1.34708e-30	-
Venular Width	19	49277753	HSD17B14	GTEx/v8	Artery_Tibial	ENSG00000087076	T	9.27744e-06	-0.194559	3.61523e-57	-
Arteriolar Tortuosity	14	60806759	DHRS7	GTEx/v8	Muscle_Skeletal	ENSG00000100612	C	9.38252e-06	-0.0845172	1.63518e-08	-
Arteriolar Tortuosity	22	40865417	TNRC6B	GTEx/v8	Brain_Cerebellum	ENSG00000100354	T	9.77652e-06	0.192167	0.000101201	+
Arteriolar Tortuosity	2	218573932	CXCR2	GTEx/v8	Brain_CaudArteriolar Tortuositye_basal_ganglia	ENSG00000180871	A	1.001e-05	0.632373	0.0230575	+
Venular Width	10	70003230	DNAJC12	GTEx/v8	Brain_Cerebellum	ENSG00000108176	A	1.0021e-05	0.296121	0.0132625	+
Arteriolar Tortuosity	6	31742242	HLA-DQB2	GTEx/v8	Esophagus_Muscularis	ENSG00000232629	C	1.02817e-05	0.485795	7.81114e-76	+
Venular Tortuosity	1	227406883	OBSCN	GTEx/v8	Skin_Not_Sun_Exposed_Suprapubic	ENSG00000154358	T	1.06762e-05	0.242046	1.92323e-62	-
Arteriolar Tortuosity	15	56165640	MNS1	GTEx/v8	Brain_Cortex	ENSG00000138587	G	1.07078e-05	-0.757479	0.0203433	-
Arteriolar Tortuosity	2	242425392	Arteriolar TortuosityG4B	GTEx/v8	Colon_Transverse	ENSG00000168397	T	1.07742e-05	-0.226316	3.74629e-09	-
Arteriolar Tortuosity	5	63874626	FAM159B	GTEx/v8	Pancreas	ENSG00000145642	G	1.08307e-05	0.266279	9.14814e-07	+
Venular Width	15	89724364	FANCI	GTEx/v8	Brain_Putamen_basal_ganglia	ENSG00000140525	A	1.08664e-05	-0.383924	0.0361326	-
Venular Width	8	10958824	C8orf49	GTEx/v8	Heart_Left_Ventricle	ENSG00000255394	C	1.08723e-05	-0.229652	2.0822e-15	+
Venular Tortuosity	19	38978236	MAP4K1	GTEx/v8	Thyroid	ENSG00000104814	T	1.09027e-05	0.222939	0.00888902	+
Arteriolar Width	12	7057437	GNB3	GTEx/v8	Adipose_Subcutaneous	ENSG00000111664	T	1.10564e-05	-0.18924	1.79495e-51	-
Arteriolar Tortuosity	1	153990946	GArteriolar TortuosityAD2B	GTEx/v8	Brain_Hypothalamus	ENSG00000143614	T	1.10946e-05	0.295396	0.0331296	+
Venular Tortuosity	9	130320327	ST6GALNAC4	GTEx/v8	Brain_Cerebellum	ENSG00000136840	CT	1.12119e-05	-0.332458	0.0160724	NA
Arteriolar Tortuosity	9	130320327	ST6GALNAC4	GTEx/v8	Brain_Cerebellum	ENSG00000136840	CT	1.12119e-05	-0.332458	0.0160724	-
Arteriolar Tortuosity	6	31351991	C4A	GTEx/v8	Testis	ENSG00000244731	A	1.16337e-05	-0.273756	2.65523e-26	+
Arteriolar Tortuosity	15	74817689	GOLGA6C	GTEx/v8	Testis	ENSG00000167195	G	1.18263e-05	0.247719	2.758e-16	NA
Venular Width	8	10643759	PINX1	GTEx/v8	Adipose_Subcutaneous	ENSG00000254093	G	1.19481e-05	0.102993	0.0208363	-
Arteriolar Tortuosity	22	38200124	POLR2F	GTEx/v8	Nerve_Tibial	ENSG00000100142	T	1.20639e-05	0.107934	0.01396	-
Arteriolar Width	12	7057437	C12orf57	GTEx/v8	Adipose_Subcutaneous	ENSG00000111678	T	1.20643e-05	-0.126028	3.83108e-23	-
Arteriolar Tortuosity	6	31263051	CDSN	GTEx/v8	Skin_Sun_Exposed_Lower_leg	ENSG00000204539	G	1.21271e-05	0.0969717	1.58622e-15	-
Arteriolar Tortuosity	2	1579459	TPO	GTEx/v8	Nerve_Tibial	ENSG00000115705	C	1.23143e-05	-0.295009	1.54785e-17	-
Arteriolar Tortuosity	6	31208360	C2	GTEx/v8	Brain_Nucleus_accumbens_basal_ganglia	ENSG00000166278	C	1.27411e-05	0.323186	0.0221429	-
Venular Tortuosity	19	39103764	DPF1	GTEx/v8	Pituitary	ENSG00000011332	C	1.29409e-05	-0.312753	0.0273742	NA
Arteriolar Tortuosity	19	39103764	DPF1	GTEx/v8	Pituitary	ENSG00000011332	C	1.29409e-05	-0.312753	0.0273742	-
Venular Tortuosity	4	146936847	RP11-6L6.2	GTEx/v8	Artery_Aorta	ENSG00000250673	T	1.34669e-05	-0.244301	1.41681e-27	-
Venular Tortuosity	19	38905792	SIPA1L3	GTEx/v8	Lung	ENSG00000105738	A	1.36391e-05	-0.168089	0.000136093	-
Venular Tortuosity	19	38991889	PAK4	GTEx/v8	Brain_Frontal_Cortex_BA9	ENSG00000130669	T	1.4063e-05	0.251144	0.00116887	+
Venular Width	8	10577389	C8orf74	GTEx/v8	Pituitary	ENSG00000171060	G	1.43463e-05	0.21777	0.0465786	-
Arteriolar Tortuosity	11	69990872	ANO1	GTEx/v8	Thyroid	ENSG00000131620	T	1.4747e-05	-0.276169	4.20546e-10	NA
Arteriolar Tortuosity	9	130550044	LRSAM1	GTEx/v8	Brain_Frontal_Cortex_BA9	ENSG00000148356	T	1.48959e-05	0.145047	0.0377979	+
Arteriolar Tortuosity	16	14080040	MKL2	GTEx/v8	Skin_Not_Sun_Exposed_Suprapubic	ENSG00000186260	T	1.53311e-05	0.162938	4.70985e-11	+
Arteriolar Tortuosity	22	38187301	EIF3L	GTEx/v8	Skin_Not_Sun_Exposed_Suprapubic	ENSG00000100129	T	1.53554e-05	0.0968318	1.58299e-13	+
Arteriolar Tortuosity	17	56900010	PPM1E	GTEx/v8	Heart_Left_Ventricle	ENSG00000175175	A	1.53585e-05	0.367871	0.0207443	+
Arteriolar Tortuosity	1	150405177	PSMD4	GTEx/v8	Thyroid	ENSG00000159352	G	1.54507e-05	-0.0862002	9.96449e-07	NA
Arteriolar Tortuosity	22	38183382	LGALS1	GTEx/v8	Heart_Left_Ventricle	ENSG00000100097	T	1.56549e-05	0.166886	1.99237e-23	+
Venular Tortuosity	17	1975657	SMG6	GTEx/v8	Esophagus_Mucosa	ENSG00000070366	A	1.60144e-05	0.112475	0.00444055	NA
Arteriolar Tortuosity	19	39285570	SPRED3	GTEx/v8	Thyroid	ENSG00000188766	T	1.62053e-05	-0.155616	0.00495207	NA
Arteriolar Tortuosity	1	153863426	SLC27A3	GTEx/v8	Colon_Transverse	ENSG00000143554	T	1.63527e-05	-0.148278	0.000196337	-
Arteriolar Tortuosity	9	136326248	TMEM8C	GTEx/v8	Nerve_Tibial	ENSG00000187616	G	1.63788e-05	0.213332	1.57982e-24	NA
Venular Tortuosity	19	39368998	PSMD8	GTEx/v8	Skin_Not_Sun_Exposed_Suprapubic	ENSG00000099341	C	1.66016e-05	0.0764553	0.00111001	+
Arteriolar Tortuosity	1	150547938	CA14	GTEx/v8	Brain_Substantia_nigra	ENSG00000118298	A	1.67725e-05	-0.706243	0.0470574	+
Arteriolar Tortuosity	15	75456338	COMMD4	GTEx/v8	Brain_Nucleus_accumbens_basal_ganglia	ENSG00000140365	T	1.71746e-05	0.159211	3.27929e-08	-
Arteriolar Width	11	33010297	PRRG4	GTEx/v8	Liver	ENSG00000135378	A	1.74396e-05	1.63947	0.0494457	+
Venular Tortuosity	9	130331717	NAIF1	GTEx/v8	Brain_Cortex	ENSG00000171169	G	1.76054e-05	0.41776	0.0305093	NA
Arteriolar Tortuosity	9	130331717	NAIF1	GTEx/v8	Brain_Cortex	ENSG00000171169	G	1.76054e-05	0.41776	0.0305093	NA
Arteriolar Tortuosity	6	31773821	NEU1	GTEx/v8	Thyroid	ENSG00000204386	T	1.82379e-05	0.173415	5.46778e-08	+
Venular Width	15	89769905	ABHD2	GTEx/v8	Artery_Tibial	ENSG00000140526	C	1.84152e-05	0.0912342	0.00765343	-
Venular Width	19	49116076	SPACA4	GTEx/v8	Breast_Mammary_Tissue	ENSG00000177202	G	1.88042e-05	-0.215714	0.00768286	NA
Arteriolar Tortuosity	19	46158293	EML2	GTEx/v8	Testis	ENSG00000125746	G	1.89999e-05	-0.156541	0.0014775	-
Arteriolar Tortuosity	1	167552890	CD247	GTEx/v8	Lung	ENSG00000198821	A	1.92759e-05	0.109975	0.00163528	-
Arteriolar Tortuosity	19	46214297	FBXO46	GTEx/v8	Colon_Transverse	ENSG00000177051	T	1.93616e-05	0.13901	0.0415539	+
Venular Width	15	53775605	ONECUT1	GTEx/v8	Nerve_Tibial	ENSG00000169856	C	1.95086e-05	-0.223548	0.0166218	+
Arteriolar Tortuosity	1	151018861	GABPB2	GTEx/v8	Cells_Cultured_fibroblasts	ENSG00000143458	G	1.97809e-05	0.11788	4.4768e-19	NA
Arteriolar Tortuosity	4	186789379	SORBS2	GTEx/v8	Esophagus_Mucosa	ENSG00000154556	C	1.98744e-05	0.154665	2.59368e-11	+
Arteriolar Tortuosity	10	105667110	NEURL1	GTEx/v8	Esophagus_Muscularis	ENSG00000107954	C	2.09411e-05	-0.160287	0.00168335	+
Arteriolar Tortuosity	1	150273976	C1orf51	GTEx/v8	Cells_Cultured_fibroblasts	ENSG00000159208	G	2.12426e-05	-0.245464	0.00998761	NA
Arteriolar Tortuosity	1	914852	NOC2L	GTEx/v8	Whole_Blood	ENSG00000188976	C	2.13222e-05	0.0535775	0.000106168	-
Arteriolar Tortuosity	17	56425704	CUEDC1	GTEx/v8	Pancreas	ENSG00000180891	A	2.13828e-05	-0.226568	0.0439799	-
Arteriolar Tortuosity	6	31347980	PRRT1	GTEx/v8	Small_Intestine_Terminal_Ileum	ENSG00000204314	T	2.14325e-05	0.183304	0.0137653	-
Arteriolar Tortuosity	15	75425695	COX5A	GTEx/v8	Spleen	ENSG00000178741	TAAC	2.19289e-05	0.117102	0.0269298	-
Venular Tortuosity	19	38972325	GMFG	GTEx/v8	Heart_Arteriolar Tortuosityrial_Appendage	ENSG00000130755	T	2.20077e-05	0.19622	0.0359872	NA
Arteriolar Tortuosity	19	38972325	GMFG	GTEx/v8	Heart_Arteriolar Tortuosityrial_Appendage	ENSG00000130755	T	2.20077e-05	0.19622	0.0359872	+
Arteriolar Tortuosity	8	38381222	TACC1	GTEx/v8	Colon_Sigmoid	ENSG00000147526	G	2.20478e-05	-0.182952	0.0291353	-
Arteriolar Tortuosity	6	31803074	VARS	GTEx/v8	Esophagus_Muscularis	ENSG00000204394	T	2.35928e-05	0.134939	0.0187988	+
Venular Tortuosity	17	1982246	MNT	GTEx/v8	Lung	ENSG00000070444	A	2.37238e-05	0.156284	0.00184459	-
Venular Tortuosity	19	38902446	FAM98C	GTEx/v8	Skin_Sun_Exposed_Lower_leg	ENSG00000130244	A	2.37804e-05	0.116625	1.45774e-08	+
Arteriolar Tortuosity	19	38902446	FAM98C	GTEx/v8	Skin_Sun_Exposed_Lower_leg	ENSG00000130244	A	2.37804e-05	0.116625	1.45774e-08	+
Arteriolar Tortuosity	1	227217789	H3F3A	GTEx/v8	Brain_Cerebellum	ENSG00000163041	A	2.41951e-05	0.595511	7.39348e-20	NA
Arteriolar Tortuosity	15	74592862	SEMA7A	GTEx/v8	Nerve_Tibial	ENSG00000138623	A	2.4213e-05	0.118905	9.98744e-07	NA
Arteriolar Tortuosity	15	75329091	FAM219B	GTEx/v8	Esophagus_Mucosa	ENSG00000178761	C	2.46908e-05	0.0903754	4.83675e-10	NA
Venular Tortuosity	16	51466140	SALL1	GTEx/v8	Thyroid	ENSG00000103449	A	2.48795e-05	-0.124545	0.0213576	-
Arteriolar Tortuosity	19	14571966	TECR	GTEx/v8	Skin_Sun_Exposed_Lower_leg	ENSG00000099797	G	2.52784e-05	-0.0722725	1.03178e-17	NA
Arteriolar Tortuosity	22	41063177	MKL1	GTEx/v8	Brain_CaudArteriolar Tortuositye_basal_ganglia	ENSG00000196588	T	2.53479e-05	-0.236413	0.0298821	+
Arteriolar Tortuosity	5	159502697	TTC1	GTEx/v8	Heart_Left_Ventricle	ENSG00000113312	T	2.5866e-05	0.103494	5.29085e-12	NA
Arteriolar Tortuosity	6	31872383	FKBPL	GTEx/v8	Skin_Sun_Exposed_Lower_leg	ENSG00000204315	A	2.60209e-05	-0.150611	5.83742e-09	-
Venular Tortuosity	15	77410878	ISL2	GTEx/v8	Whole_Blood	ENSG00000159556	G	2.61374e-05	0.155487	9.33995e-30	+
Arteriolar Tortuosity	3	20128811	SGOL1	GTEx/v8	Stomach	ENSG00000129810	G	2.63917e-05	-0.286181	0.0158303	-
Arteriolar Tortuosity	15	52008741	FAM214A	GTEx/v8	Esophagus_Gastroesophageal_Junction	ENSG00000047346	G	2.70223e-05	-0.103474	6.2308e-07	+
Arteriolar Tortuosity	1	110492809	UBL4B	GTEx/v8	Skin_Sun_Exposed_Lower_leg	ENSG00000186150	G	2.71082e-05	-0.204703	0.021896	+
Arteriolar Tortuosity	2	112277492	FBLN7	GTEx/v8	Artery_Tibial	ENSG00000144152	G	2.74324e-05	0.172204	2.91875e-60	NA
Arteriolar Width	1	32164871	FAM167B	GTEx/v8	Nerve_Tibial	ENSG00000183615	G	2.77031e-05	0.533489	0.00851389	+
Arteriolar Tortuosity	1	150001721	ANP32E	GTEx/v8	Brain_Cortex	ENSG00000143401	T	2.77806e-05	0.125859	0.0273117	+
Venular Tortuosity	2	242404437	Arteriolar TortuosityG4B	GTEx/v8	Colon_Transverse	ENSG00000168397	G	2.80169e-05	-0.17992	3.74629e-09	-
Arteriolar Tortuosity	9	136323754	ADAMTSL2	GTEx/v8	Nerve_Tibial	ENSG00000197859	G	2.83532e-05	0.140569	6.07345e-23	-
Arteriolar Tortuosity	6	31800236	LY6G6F	GTEx/v8	Skin_Not_Sun_Exposed_Suprapubic	ENSG00000204424	G	2.87406e-05	0.407324	0.0357658	+
Arteriolar Tortuosity	14	60794967	PPM1A	GTEx/v8	Brain_CaudArteriolar Tortuositye_basal_ganglia	ENSG00000100614	A	2.89137e-05	-0.194072	0.00118115	-
Arteriolar Tortuosity	1	153760104	S100A9	GTEx/v8	Skin_Sun_Exposed_Lower_leg	ENSG00000163220	A	2.9904e-05	0.153578	0.0178119	+
Arteriolar Tortuosity	1	183603399	SMG7	GTEx/v8	Esophagus_Mucosa	ENSG00000116698	G	2.9929e-05	0.113361	0.00540712	+
Venular Tortuosity	1	227525716	JMJD4	GTEx/v8	Nerve_Tibial	ENSG00000081692	T	3.04256e-05	0.135553	0.00161598	-
Venular Tortuosity	9	130185385	AK1	GTEx/v8	Colon_Transverse	ENSG00000106992	A	3.0991e-05	-0.190582	2.23146e-20	-
Arteriolar Tortuosity	15	52331888	GLDN	GTEx/v8	Testis	ENSG00000186417	C	3.12034e-05	0.250463	0.0271361	-
Arteriolar Tortuosity	1	170378820	SELL	GTEx/v8	Spleen	ENSG00000188404	G	3.12533e-05	-0.205764	0.00578125	+
Venular Tortuosity	19	39121016	ZNF781	GTEx/v8	Minor_Salivary_Gland	ENSG00000196381	A	3.19473e-05	-1.0682	0.0015446	-
Arteriolar Tortuosity	9	130347118	SLC2A8	GTEx/v8	Nerve_Tibial	ENSG00000136856	T	3.21275e-05	0.170994	6.9075e-39	-
Venular Width	19	49214274	SULT2B1	GTEx/v8	Adipose_Subcutaneous	ENSG00000088002	A	3.37192e-05	0.210315	7.35172e-19	NA
Arteriolar Tortuosity	11	62265756	FADS3	GTEx/v8	Artery_Aorta	ENSG00000221968	T	3.41134e-05	-0.179791	0.0433353	NA
Arteriolar Width	12	7059640	CDCA3	GTEx/v8	Artery_Tibial	ENSG00000111665	G	3.48698e-05	-0.248918	1.51352e-36	NA
Arteriolar Tortuosity	13	29113508	POLR1D	GTEx/v8	Lung	ENSG00000186184	T	3.4876e-05	0.133496	1.45619e-29	-
Venular Tortuosity	9	130562816	DPM2	GTEx/v8	Cells_Cultured_fibroblasts	ENSG00000136908	A	3.51786e-05	-0.121888	2.3998e-15	-
Arteriolar Tortuosity	16	75512296	CTRB1	GTEx/v8	Artery_Aorta	ENSG00000168925	GC	3.58723e-05	0.262045	0.00810728	+
Arteriolar Tortuosity	11	70014600	PPFIA1	GTEx/v8	Nerve_Tibial	ENSG00000131626	A	3.61702e-05	0.235786	2.84184e-113	NA
Arteriolar Tortuosity	2	218719300	C2orf62	GTEx/v8	Colon_Sigmoid	ENSG00000158428	A	3.63603e-05	0.357716	0.0494493	+
Arteriolar Tortuosity	9	130358917	ZNF79	GTEx/v8	Heart_Left_Ventricle	ENSG00000196152	G	3.69083e-05	-0.378024	2.59181e-20	-
Arteriolar Tortuosity	1	931362	SLC35E2	GTEx/v8	Adipose_Visceral_Omentum	ENSG00000215790	A	3.73151e-05	0.180078	1.24389e-36	+
Arteriolar Width	12	7062391	PHB2	GTEx/v8	Muscle_Skeletal	ENSG00000215021	G	3.74337e-05	-0.12376	0.00760101	-
Arteriolar Tortuosity	19	38961534	PPP1R14A	GTEx/v8	Stomach	ENSG00000167641	A	3.82878e-05	-0.175986	1.40992e-06	-
Arteriolar Tortuosity	6	31769479	EGFL8	GTEx/v8	Skin_Sun_Exposed_Lower_leg	ENSG00000241404	A	3.8486e-05	0.169265	0.0396504	+
Arteriolar Tortuosity	1	169053925	METTL18	GTEx/v8	Muscle_Skeletal	ENSG00000171806	A	3.84886e-05	0.143663	1.27768e-45	+
Arteriolar Tortuosity	20	33718993	AHCY	GTEx/v8	Esophagus_Muscularis	ENSG00000101444	G	3.84916e-05	-0.147325	8.48242e-05	+
Arteriolar Tortuosity	6	31695590	HLA-DRB1	GTEx/v8	Stomach	ENSG00000196126	C	3.85535e-05	-0.360739	5.66304e-13	-
Arteriolar Tortuosity	8	38440791	GPR124	GTEx/v8	Whole_Blood	ENSG00000020181	A	3.86157e-05	-0.252772	7.28579e-11	+
Venular Tortuosity	9	130233956	SLC25A25	GTEx/v8	Skin_Sun_Exposed_Lower_leg	ENSG00000148339	T	3.91259e-05	-0.130739	0.00909551	-
Arteriolar Tortuosity	2	242175331	MTERFD2	GTEx/v8	Nerve_Tibial	ENSG00000122085	C	3.98348e-05	0.167664	2.45189e-23	NA
Arteriolar Tortuosity	7	45216600	DDX56	GTEx/v8	Nerve_Tibial	ENSG00000136271	A	4.03392e-05	-0.126377	1.1246e-06	+
Arteriolar Tortuosity	6	31692386	IER3	GTEx/v8	Thyroid	ENSG00000137331	G	4.05189e-05	-0.335338	4.92931e-20	-
Arteriolar Tortuosity	20	33544277	ITCH	GTEx/v8	Skin_Sun_Exposed_Lower_leg	ENSG00000078747	G	4.05825e-05	-0.131688	2.39611e-13	+
Arteriolar Tortuosity	15	74610400	STRA6	GTEx/v8	Nerve_Tibial	ENSG00000137868	A	4.30372e-05	-0.186351	0.0129563	NA
Arteriolar Tortuosity	17	1991460	MNT	GTEx/v8	Lung	ENSG00000070444	G	4.41259e-05	0.155079	0.00184459	NA
Venular Width	15	53969364	UNC13C	GTEx/v8	Thyroid	ENSG00000137766	A	4.43085e-05	-0.172587	1.98286e-34	+
Arteriolar Tortuosity	15	52382921	CYP19A1	GTEx/v8	Ovary	ENSG00000137869	C	4.43376e-05	0.35318	0.00707907	-
Arteriolar Tortuosity	9	136237672	SLC2A6	GTEx/v8	Cells_Cultured_fibroblasts	ENSG00000160326	A	4.46639e-05	0.12086	4.44236e-07	+
Venular Width	19	49104308	ZNF114	GTEx/v8	Skin_Sun_Exposed_Lower_leg	ENSG00000178150	T	4.54516e-05	0.216113	4.69901e-12	+
Venular Tortuosity	9	130234154	ZBTB43	GTEx/v8	Cells_Cultured_fibroblasts	ENSG00000169155	C	4.60527e-05	-0.100095	2.90591e-11	-
Arteriolar Tortuosity	22	38117943	TMEM184B	GTEx/v8	Lung	ENSG00000198792	C	4.65362e-05	0.105139	1.03069e-05	+
Arteriolar Tortuosity	6	31582572	C6orf47	GTEx/v8	Nerve_Tibial	ENSG00000204439	C	4.7078e-05	0.2234	0.0458987	+
Arteriolar Tortuosity	11	8861044	STK33	GTEx/v8	Spleen	ENSG00000130413	T	4.72797e-05	0.309241	4.47888e-05	+
Arteriolar Tortuosity	6	31263051	RNF5	GTEx/v8	Heart_Left_Ventricle	ENSG00000204308	G	4.78004e-05	-0.117236	4.62073e-10	+
Arteriolar Tortuosity	11	62255354	NXF1	GTEx/v8	Nerve_Tibial	ENSG00000162231	A	4.80612e-05	0.17022	0.034362	+
Arteriolar Tortuosity	2	111933001	BCL2L11	GTEx/v8	Muscle_Skeletal	ENSG00000153094	T	4.84328e-05	0.220825	0.0302814	-
Arteriolar Tortuosity	20	33778866	ERGIC3	GTEx/v8	Artery_Tibial	ENSG00000125991	A	4.92589e-05	-0.144046	0.00189419	+
Arteriolar Tortuosity	1	952003	TNFRSF18	GTEx/v8	Esophagus_Mucosa	ENSG00000186891	A	5.05555e-05	0.143777	0.000968964	+
Arteriolar Tortuosity	19	46352203	QPCTL	GTEx/v8	Cells_Cultured_fibroblasts	ENSG00000011478	T	5.12955e-05	0.110735	0.0022015	+
Arteriolar Tortuosity	1	92313638	C1orf146	GTEx/v8	Nerve_Tibial	ENSG00000203910	T	5.15715e-05	-0.203638	0.0223219	-
Arteriolar Tortuosity	1	149858520	BOLA1	GTEx/v8	Esophagus_Muscularis	ENSG00000178096	G	5.22838e-05	0.340461	0.0252743	-
Arteriolar Tortuosity	7	45223331	TBRG4	GTEx/v8	Skin_Not_Sun_Exposed_Suprapubic	ENSG00000136270	T	5.26728e-05	-0.102487	1.42827e-09	+
Arteriolar Tortuosity	17	57210313	EPX	GTEx/v8	Artery_Aorta	ENSG00000121053	A	5.34502e-05	-0.443047	0.0218424	-
Arteriolar Tortuosity	15	52381153	MAPK6	GTEx/v8	Thyroid	ENSG00000069956	G	5.34697e-05	0.115809	8.97117e-06	-
Arteriolar Tortuosity	5	1097281	CEP72	GTEx/v8	Lung	ENSG00000112877	C	5.35567e-05	-0.16346	7.39075e-06	+
Venular Tortuosity	9	130506178	SWI5	GTEx/v8	Whole_Blood	ENSG00000175854	G	5.60371e-05	-0.11681	3.03084e-06	+
Arteriolar Tortuosity	20	33741570	UQCC1	GTEx/v8	Brain_CaudArteriolar Tortuositye_basal_ganglia	ENSG00000101019	A	5.60937e-05	-0.274982	3.95878e-05	+
Arteriolar Tortuosity	17	57210313	DHX40	GTEx/v8	Esophagus_Mucosa	ENSG00000108406	A	5.6152e-05	0.155144	2.48149e-07	+
Arteriolar Width	12	7065281	EMG1	GTEx/v8	Cells_Cultured_fibroblasts	ENSG00000126749	T	5.66608e-05	-0.10755	2.58915e-10	-
Arteriolar Tortuosity	4	1794188	TACC3	GTEx/v8	Heart_Left_Ventricle	ENSG00000013810	C	5.67674e-05	0.18596	6.96952e-08	+
Arteriolar Tortuosity	4	120186360	SEC24D	GTEx/v8	Brain_Cortex	ENSG00000150961	C	5.76011e-05	-0.211594	0.0250114	NA
Arteriolar Tortuosity	1	227637092	OBSCN	GTEx/v8	Skin_Not_Sun_Exposed_Suprapubic	ENSG00000154358	T	5.77708e-05	0.172998	1.92323e-62	-
Arteriolar Tortuosity	5	1102134	SLC9A3	GTEx/v8	Artery_Aorta	ENSG00000066230	C	5.84333e-05	0.313044	1.47599e-46	-
Venular Width	13	28984063	FLT1	GTEx/v8	Nerve_Tibial	ENSG00000102755	G	6.00083e-05	0.128979	0.0495803	-
Arteriolar Tortuosity	6	31358450	ABHD16A	GTEx/v8	Artery_Aorta	ENSG00000204427	A	6.02242e-05	0.194005	3.04361e-07	-
Arteriolar Width	6	108549259	OSTM1	GTEx/v8	Muscle_Skeletal	ENSG00000081087	C	6.02696e-05	0.314525	0.0196604	+
Arteriolar Tortuosity	6	31428987	Venular WidthA7	GTEx/v8	Heart_Left_Ventricle	ENSG00000204396	T	6.03541e-05	-0.207802	1.33527e-05	+
Venular Width	1	196905205	ZBTB41	GTEx/v8	Adipose_Visceral_Omentum	ENSG00000177888	C	6.12917e-05	0.103108	7.68605e-05	-
Arteriolar Tortuosity	17	2067737	METTL16	GTEx/v8	Muscle_Skeletal	ENSG00000127804	A	6.15703e-05	-0.179325	3.10167e-43	-
Arteriolar Width	11	32897698	EIF3M	GTEx/v8	Skin_Sun_Exposed_Lower_leg	ENSG00000149100	G	6.18048e-05	0.335487	0.00183904	NA
Arteriolar Tortuosity	1	150897172	C2CD4D	GTEx/v8	Skin_Sun_Exposed_Lower_leg	ENSG00000225556	C	6.64238e-05	-0.109671	1.97117e-05	-
Arteriolar Tortuosity	22	38173113	CDC42EP1	GTEx/v8	Whole_Blood	ENSG00000128283	T	6.67734e-05	-0.159957	2.71592e-42	-
Arteriolar Tortuosity	6	31803074	DPCR1	GTEx/v8	Esophagus_Mucosa	ENSG00000168631	T	6.7032e-05	-0.223177	0.00208483	-
Arteriolar Tortuosity	11	62272536	METTL12	GTEx/v8	Adipose_Subcutaneous	ENSG00000214756	G	6.77221e-05	-0.347868	4.57508e-08	NA
Arteriolar Tortuosity	15	75308561	AC105020.1	GTEx/v8	Skin_Sun_Exposed_Lower_leg	ENSG00000203392	T	6.79e-05	0.137093	7.62052e-13	+
Arteriolar Tortuosity	1	153797015	S100A1	GTEx/v8	Skin_Not_Sun_Exposed_Suprapubic	ENSG00000160678	A	6.81655e-05	-0.200471	1.04791e-59	-
Arteriolar Tortuosity	1	169025805	NME7	GTEx/v8	Esophagus_Muscularis	ENSG00000143156	G	6.84716e-05	-0.141982	8.02685e-57	-
Arteriolar Tortuosity	6	31330969	C6orf15	GTEx/v8	Skin_Sun_Exposed_Lower_leg	ENSG00000204542	A	6.85088e-05	0.144348	2.06106e-05	-
Arteriolar Tortuosity	17	57280952	C17orf47	GTEx/v8	Testis	ENSG00000181013	G	6.9269e-05	0.113297	2.23906e-07	-
Arteriolar Tortuosity	1	150514747	HIST2H2AA4	GTEx/v8	Spleen	ENSG00000203812	T	7.06696e-05	0.57221	0.0461854	-
Arteriolar Tortuosity	1	151018861	POGZ	GTEx/v8	Muscle_Skeletal	ENSG00000143442	G	7.08316e-05	-0.103671	1.22133e-21	NA
Arteriolar Tortuosity	1	92313638	EVI5	GTEx/v8	Whole_Blood	ENSG00000067208	T	7.12512e-05	0.0726622	1.47256e-09	+
Arteriolar Tortuosity	11	8848520	RPL27A	GTEx/v8	Breast_Mammary_Tissue	ENSG00000166441	G	7.13423e-05	-0.095918	4.66186e-08	-
Arteriolar Tortuosity	14	65167974	ZBTB25	GTEx/v8	Pancreas	ENSG00000089775	G	7.1962e-05	-0.180236	0.0388527	+
Venular Width	20	22682109	NAPB	GTEx/v8	Colon_Sigmoid	ENSG00000125814	A	7.27495e-05	0.179896	0.0094317	+
Arteriolar Tortuosity	20	33694210	ACSS2	GTEx/v8	Nerve_Tibial	ENSG00000131069	G	7.28515e-05	0.194449	7.90936e-17	-
Arteriolar Tortuosity	17	63906955	CEP112	GTEx/v8	Adipose_Subcutaneous	ENSG00000154240	CAAG	7.31642e-05	-0.196794	2.16936e-09	-
Arteriolar Tortuosity	22	40828375	ST13	GTEx/v8	Liver	ENSG00000100380	A	7.37443e-05	0.160474	1.40946e-07	+
Venular Tortuosity	19	38736485	SPRED3	GTEx/v8	Skin_Sun_Exposed_Lower_leg	ENSG00000188766	T	7.43101e-05	0.163197	0.0138509	+
Arteriolar Tortuosity	5	1102352	C5orf55	GTEx/v8	Nerve_Tibial	ENSG00000221990	C	7.44568e-05	0.179365	1.7641e-40	-
Venular Tortuosity	2	242176587	D2HGDH	GTEx/v8	Adipose_Subcutaneous	ENSG00000180902	C	7.49122e-05	-0.345319	2.55837e-56	-
Arteriolar Tortuosity	6	31321413	NRM	GTEx/v8	Heart_Left_Ventricle	ENSG00000137404	C	7.51435e-05	-0.217998	0.000446292	+
Arteriolar Tortuosity	6	31347980	GTF2H4	GTEx/v8	Thyroid	ENSG00000213780	T	7.73766e-05	0.148835	1.42088e-21	-
Arteriolar Tortuosity	19	39274276	FBXO27	GTEx/v8	Nerve_Tibial	ENSG00000161243	A	7.77467e-05	-0.318106	1.1191e-43	-
Arteriolar Tortuosity	17	74720877	MFSD11	GTEx/v8	Artery_Tibial	ENSG00000092931	A	7.79475e-05	0.131749	1.34922e-08	+
Arteriolar Tortuosity	3	149741488	ANKUB1	GTEx/v8	Nerve_Tibial	ENSG00000206199	T	7.85035e-05	-0.144985	2.49163e-05	-
Arteriolar Tortuosity	6	31330969	C6orf48	GTEx/v8	Adrenal_Gland	ENSG00000204387	A	7.92953e-05	-0.215066	0.00881323	+
Arteriolar Tortuosity	8	38418486	RAB11FIP1	GTEx/v8	Nerve_Tibial	ENSG00000156675	A	8.33615e-05	-0.248466	0.0492197	+
Arteriolar Tortuosity	6	31496467	HLA-DRA	GTEx/v8	Adipose_Visceral_Omentum	ENSG00000204287	A	8.37333e-05	-0.283544	0.000347503	NA
Arteriolar Tortuosity	6	31873227	HLA-DOB	GTEx/v8	Breast_Mammary_Tissue	ENSG00000241106	C	8.40301e-05	-0.383059	5.57829e-38	NA
Arteriolar Tortuosity	12	116864089	HRK	GTEx/v8	Cells_Cultured_fibroblasts	ENSG00000135116	A	8.42979e-05	0.157195	1.8536e-08	-
Venular Tortuosity	9	130347118	ST6GALNAC6	GTEx/v8	Colon_Sigmoid	ENSG00000160408	T	8.51705e-05	0.217926	0.00814095	-
Arteriolar Tortuosity	9	130347118	ST6GALNAC6	GTEx/v8	Colon_Sigmoid	ENSG00000160408	T	8.51705e-05	0.217926	0.00814095	-
Arteriolar Tortuosity	5	132096323	C5orf56	GTEx/v8	Pituitary	ENSG00000197536	AAAAG	8.52639e-05	-0.30829	0.000442895	-
Arteriolar Tortuosity	8	18943192	PSD3	GTEx/v8	Cells_Cultured_fibroblasts	ENSG00000156011	G	8.61796e-05	-0.118169	6.09429e-06	-
Arteriolar Tortuosity	19	39298414	SIRT2	GTEx/v8	Whole_Blood	ENSG00000068903	C	8.62625e-05	0.0827203	0.000880618	+
Arteriolar Tortuosity	16	14134616	NOMO1	GTEx/v8	Heart_Arteriolar Tortuosityrial_Appendage	ENSG00000103512	A	8.65604e-05	-0.201011	2.74226e-15	-
Venular Tortuosity	2	242392775	ING5	GTEx/v8	Colon_Transverse	ENSG00000168395	C	8.66332e-05	-0.144759	3.16662e-06	-
Arteriolar Tortuosity	1	918573	Arteriolar TortuosityAD3C	GTEx/v8	Lung	ENSG00000215915	G	8.87429e-05	-0.115114	2.98707e-09	+
Arteriolar Tortuosity	16	14101953	BFAR	GTEx/v8	Muscle_Skeletal	ENSG00000103429	T	8.90754e-05	0.120202	0.000219655	-
Arteriolar Tortuosity	19	39260194	SARS2	GTEx/v8	Adipose_Visceral_Omentum	ENSG00000104835	C	8.98145e-05	0.103998	7.97428e-22	NA
Arteriolar Tortuosity	1	150860545	MRPL9	GTEx/v8	Brain_Cerebellar_Hemisphere	ENSG00000143436	TA	9.04937e-05	-0.197278	0.0246613	-
Arteriolar Tortuosity	9	130358917	GARNL3	GTEx/v8	Adipose_Subcutaneous	ENSG00000136895	G	9.0544e-05	-0.153679	4.3066e-11	-
Arteriolar Tortuosity	22	40886557	SGSM3	GTEx/v8	Nerve_Tibial	ENSG00000100359	C	9.19912e-05	-0.0759755	6.33599e-05	+
Arteriolar Tortuosity	6	7240876	RREB1	GTEx/v8	Artery_Tibial	ENSG00000124782	A	9.43641e-05	-0.154231	2.27528e-07	-
Arteriolar Tortuosity	2	218462399	IGFBP2	GTEx/v8	Thyroid	ENSG00000115457	T	9.456e-05	-0.299166	0.00289689	-
Arteriolar Tortuosity	14	105784927	NUDT14	GTEx/v8	Thyroid	ENSG00000183828	T	9.56724e-05	0.127908	1.435e-28	+
Arteriolar Tortuosity	1	151115752	PIP5K1A	GTEx/v8	Heart_Arteriolar Tortuosityrial_Appendage	ENSG00000143398	T	9.61882e-05	0.17509	2.19347e-06	-
Venular Width	15	89746946	MFGE8	GTEx/v8	Cells_Cultured_fibroblasts	ENSG00000140545	G	9.69208e-05	0.134826	1.44071e-23	-
Arteriolar Tortuosity	7	45224150	MYO1G	GTEx/v8	Esophagus_Mucosa	ENSG00000136286	T	9.75927e-05	-0.0770562	0.0244791	+
Arteriolar Tortuosity	12	79811429	SYT1	GTEx/v8	Whole_Blood	ENSG00000067715	C	9.79106e-05	0.207706	1.74828e-09	NA
Arteriolar Tortuosity	2	212035546	ACADL	GTEx/v8	Skin_Sun_Exposed_Lower_leg	ENSG00000115361	A	9.82253e-05	0.140229	0.0414941	-
Arteriolar Tortuosity	17	57281629	MKS1	GTEx/v8	Adipose_Subcutaneous	ENSG00000011143	C	9.90483e-05	-0.123268	0.00361479	+
Arteriolar Tortuosity	3	149489886	COMMD2	GTEx/v8	Esophagus_Muscularis	ENSG00000114744	G	9.95131e-05	0.135947	3.1727e-28	+
Arteriolar Tortuosity	6	31350090	HSPA1B	GTEx/v8	Testis	ENSG00000204388	T	0.000101527	-0.202199	0.0236195	+
Arteriolar Tortuosity	17	74620823	ITGB4	GTEx/v8	Skin_Sun_Exposed_Lower_leg	ENSG00000132470	G	0.000101658	0.0823505	0.000274907	+
Arteriolar Tortuosity	9	130525294	GLE1	GTEx/v8	Adipose_Subcutaneous	ENSG00000119392	A	0.000102971	0.246208	1.0105e-32	+
Venular Tortuosity	17	1997444	RTN4RL1	GTEx/v8	Cells_Cultured_fibroblasts	ENSG00000185924	C	0.000104088	0.177974	2.20923e-29	NA
Arteriolar Tortuosity	15	75361650	FBXO22	GTEx/v8	Brain_Nucleus_accumbens_basal_ganglia	ENSG00000167196	C	0.00010533	0.276115	0.0153186	+
Arteriolar Tortuosity	1	227380863	C1orf95	GTEx/v8	Skin_Not_Sun_Exposed_Suprapubic	ENSG00000203685	A	0.000105585	0.15838	0.00430941	-
Venular Tortuosity	9	100305357	HIArteriolar TortuosityL2	GTEx/v8	Adipose_Visceral_Omentum	ENSG00000196312	A	0.000106579	0.115992	1.35942e-27	+
Arteriolar Tortuosity	6	705522	HUS1B	GTEx/v8	Skin_Not_Sun_Exposed_Suprapubic	ENSG00000188996	C	0.00010673	0.174824	0.0402904	+
Venular Tortuosity	9	130330036	ENG	GTEx/v8	Whole_Blood	ENSG00000106991	G	0.0001077	0.0828121	8.28514e-06	NA
Arteriolar Tortuosity	9	130330036	ENG	GTEx/v8	Whole_Blood	ENSG00000106991	G	0.0001077	0.0828121	8.28514e-06	NA
Arteriolar Tortuosity	7	91044799	MTERF	GTEx/v8	Muscle_Skeletal	ENSG00000127989	C	0.000107912	-0.0931575	0.0262219	+
Arteriolar Tortuosity	15	75354972	NRG4	GTEx/v8	Nerve_Tibial	ENSG00000169752	C	0.000111974	-0.153807	0.0362936	NA
Arteriolar Tortuosity	6	31572975	DXO	GTEx/v8	Esophagus_Muscularis	ENSG00000204348	C	0.000112422	0.17839	6.52087e-14	+
Arteriolar Tortuosity	15	74592862	UBL7	GTEx/v8	Muscle_Skeletal	ENSG00000138629	A	0.000113613	0.0806478	4.10177e-06	NA
Arteriolar Tortuosity	1	227205331	JMJD4	GTEx/v8	Nerve_Tibial	ENSG00000081692	C	0.000113708	-0.0888082	0.00161598	-
Venular Tortuosity	19	39449513	CCER2	GTEx/v8	Thyroid	ENSG00000262484	A	0.000119326	-0.130022	0.00217839	-
Arteriolar Tortuosity	9	130576776	LCN2	GTEx/v8	Esophagus_Mucosa	ENSG00000148346	G	0.000120505	-0.127119	7.53342e-12	-
Arteriolar Tortuosity	2	54847934	RTN4	GTEx/v8	Thyroid	ENSG00000115310	A	0.000124332	0.127374	7.54416e-72	+
Arteriolar Tortuosity	4	1796636	FAM53A	GTEx/v8	Muscle_Skeletal	ENSG00000174137	C	0.000133114	0.192239	5.04416e-70	+
Arteriolar Tortuosity	1	169016679	C1orf112	GTEx/v8	Artery_Aorta	ENSG00000000460	C	0.000134179	0.215883	4.0193e-06	+
Arteriolar Tortuosity	14	60861498	MNArteriolar Tortuosity1	GTEx/v8	Testis	ENSG00000020426	C	0.000135728	0.14924	0.0360749	+
Arteriolar Tortuosity	1	110505038	LAMTOR5	GTEx/v8	Adipose_Subcutaneous	ENSG00000134248	C	0.000136	0.124107	1.02841e-06	+
Arteriolar Tortuosity	6	31358343	HLA-E	GTEx/v8	Adipose_Subcutaneous	ENSG00000204592	T	0.00013946	-0.176373	5.6755e-16	-
Arteriolar Width	6	109105118	ARMC2	GTEx/v8	Esophagus_Muscularis	ENSG00000118690	G	0.000141351	0.787989	2.9811e-09	+
Arteriolar Tortuosity	1	984302	TTLL10	GTEx/v8	Thyroid	ENSG00000162571	C	0.000143073	0.194486	6.90913e-27	-
Arteriolar Tortuosity	13	29096824	MTUS2	GTEx/v8	Artery_Tibial	ENSG00000132938	T	0.000144281	-0.126519	0.0285196	+
Arteriolar Tortuosity	6	31449522	MUC21	GTEx/v8	Esophagus_Mucosa	ENSG00000204544	T	0.000144833	-0.119974	1.07272e-07	-
Venular Tortuosity	19	38931673	PAF1	GTEx/v8	Cells_Cultured_fibroblasts	ENSG00000006712	A	0.000150664	0.0965649	0.0327348	-
Venular Width	5	87907437	TMEM161B	GTEx/v8	Muscle_Skeletal	ENSG00000164180	C	0.000154711	0.165765	0.00118096	NA
Arteriolar Tortuosity	5	132106561	SOWAHA	GTEx/v8	Thyroid	ENSG00000198944	T	0.000155069	0.207846	0.00945151	+
Arteriolar Tortuosity	9	94339663	NFIL3	GTEx/v8	Muscle_Skeletal	ENSG00000165030	G	0.000155912	0.095476	0.0413438	-
Arteriolar Tortuosity	6	31758240	MSH5	GTEx/v8	Thyroid	ENSG00000204410	A	0.000160137	0.139735	7.28448e-07	+
Arteriolar Tortuosity	5	132069739	PDLIM4	GTEx/v8	Heart_Left_Ventricle	ENSG00000131435	G	0.000168247	0.18583	6.02052e-16	+
Arteriolar Tortuosity	5	132138129	AFF4	GTEx/v8	Thyroid	ENSG00000072364	T	0.000171403	0.100876	7.50884e-28	+
Arteriolar Tortuosity	5	1110797	AHRR	GTEx/v8	Muscle_Skeletal	ENSG00000063438	C	0.000177854	0.196083	1.81646e-07	NA
Venular Tortuosity	9	130554998	LCN2	GTEx/v8	Esophagus_Mucosa	ENSG00000148346	A	0.000180179	-0.129612	7.53342e-12	-
Venular Tortuosity	19	39324158	HNRNPL	GTEx/v8	Thyroid	ENSG00000104824	C	0.000180752	0.100878	0.0032671	-
Arteriolar Tortuosity	15	74628242	STOML1	GTEx/v8	Adipose_Subcutaneous	ENSG00000067221	T	0.000182603	-0.141284	3.06085e-31	+
Arteriolar Tortuosity	2	218717053	RQCD1	GTEx/v8	Adipose_Subcutaneous	ENSG00000144580	G	0.000184744	0.113887	0.000124831	+
Arteriolar Tortuosity	5	71665245	MAP1B	GTEx/v8	Artery_Tibial	ENSG00000131711	G	0.000186459	0.155557	3.09125e-104	-
Arteriolar Tortuosity	4	119959452	METTL14	GTEx/v8	Skin_Sun_Exposed_Lower_leg	ENSG00000145388	A	0.000189483	-0.353576	0.000366776	NA
Arteriolar Tortuosity	11	62280932	LGALS12	GTEx/v8	Adipose_Subcutaneous	ENSG00000133317	A	0.000193811	-0.172166	0.000496391	NA
Arteriolar Tortuosity	6	31348580	PPP1R18	GTEx/v8	Artery_Aorta	ENSG00000146112	G	0.000193898	-0.116708	5.93056e-17	+
Arteriolar Tortuosity	1	92301833	KIAA1107	GTEx/v8	Esophagus_Mucosa	ENSG00000069712	T	0.000195606	0.125101	0.0291997	NA
Arteriolar Tortuosity	1	23286224	ASAP3	GTEx/v8	Adipose_Subcutaneous	ENSG00000088280	C	0.000196569	0.104557	3.23783e-16	-
Arteriolar Tortuosity	13	47170118	ESD	GTEx/v8	Thyroid	ENSG00000139684	C	0.000206264	0.136453	2.0345e-11	+
Arteriolar Tortuosity	6	31360668	Arteriolar TortuosityArteriolar Tortuosity1	GTEx/v8	Adipose_Subcutaneous	ENSG00000137343	A	0.000219254	0.404169	0.0020008	+
Arteriolar Tortuosity	17	57282901	CLTC	GTEx/v8	Esophagus_Gastroesophageal_Junction	ENSG00000141367	T	0.000224833	0.0794892	0.0407652	-
Venular Tortuosity	1	227519804	SNAP47	GTEx/v8	Muscle_Skeletal	ENSG00000143740	A	0.000229555	-0.127484	1.78133e-20	+
Venular Tortuosity	19	38961534	ZNF793	GTEx/v8	Cells_Cultured_fibroblasts	ENSG00000188227	A	0.000234419	-0.237678	5.17507e-34	NA
Arteriolar Tortuosity	19	38961534	ZNF793	GTEx/v8	Cells_Cultured_fibroblasts	ENSG00000188227	A	0.000234419	-0.237678	5.17507e-34	-
Venular Tortuosity	14	42952848	LRFN5	GTEx/v8	Nerve_Tibial	ENSG00000165379	T	0.000244219	-0.56212	1.0683e-10	+
Arteriolar Tortuosity	9	130503612	SLC25A25	GTEx/v8	Thyroid	ENSG00000148339	G	0.000249936	0.0979631	8.62486e-06	NA
Arteriolar Tortuosity	6	31742242	MUC22	GTEx/v8	Esophagus_Mucosa	ENSG00000261272	C	0.000283835	-0.244125	1.37238e-26	-
Arteriolar Width	1	32164871	TMEM234	GTEx/v8	Skin_Sun_Exposed_Lower_leg	ENSG00000160055	G	0.000293208	0.40372	0.021125	+
Arteriolar Tortuosity	6	31240959	SAPCD1	GTEx/v8	Nerve_Tibial	ENSG00000228727	G	0.00029722	0.0996988	0.0211518	-
Venular Tortuosity	15	77376183	ETFA	GTEx/v8	Whole_Blood	ENSG00000140374	A	0.000337381	0.0911964	8.99996e-28	-
Arteriolar Tortuosity	19	39106797	ZNF607	GTEx/v8	Cells_Cultured_fibroblasts	ENSG00000198182	A	0.000408088	0.205997	5.81285e-36	NA

## Sheet: Table H
Table H. Functional analyses of causation for SNPs associated with AT																							Legend
Tissue	Trait	probeID	ProbeChr	Gene	Probe_bp	topSNP	topSNP_chr	topSNP_bp	A1	A2	Freq	b_GWAS	se_GWAS	p_GWAS	b_eQTL	se_eQTL	p_eQTL	b_SMR	se_SMR	p_SMR	p_HEIDI		TOC
Adipose Cells	Arteriolar Tortuosity	ENSG00000178718.5	15	RPP25	75248158	rs4886636	15	75196176	A	G	0.568206	-0.0357092	0.00298122	1.3e-37	-0.375485	0.0344178	1.03675e-27	0.0951015	0.011791	7.28766e-16	0.000539516
Adipose Cells	Arteriolar Tortuosity	ENSG00000168385.13	2	SEP2	242273978	rs757978	2	242371101	T	C	0.114382	0.0377952	0.00472352	2.4e-15	0.774673	0.0502403	1.21316e-53	0.0487886	0.00686952	1.22805e-12	0.00890816
Adipose Cells	Arteriolar Tortuosity	ENSG00000182472.4	19	CAPN12	39242443	rs8107877	19	39238319	G	C	0.749276	-0.0278572	0.00344529	1.8e-17	0.745126	0.0649025	1.64946e-30	-0.0373859	0.00565539	3.82602e-11	1.92496e-09
Adipose Cells	Arteriolar Tortuosity	ENSG00000130402.7	19	ACTN4	39180266	rs13344413	19	39143289	A	G	0.469324	-0.0416622	0.00294944	6.7e-49	0.182542	0.0272907	2.25028e-11	-0.228234	0.037754	1.49153e-09	0.0778188
Adipose Cells	Arteriolar Tortuosity	ENSG00000140474.8	15	ULK3	75131997	rs1378938	15	75096443	C	T	0.735944	-0.0448329	0.00331562	2.9e-45	-0.253331	0.0376484	1.70994e-11	0.176974	0.0293773	1.6998e-09	0.0746942
Adipose Cells	Arteriolar Tortuosity	ENSG00000163431.11	1	LMOD1	201890647	rs2819348	1	201884952	C	T	0.346461	-0.0215289	0.00305246	3.8e-14	-0.236888	0.0243734	2.4996e-22	0.0908822	0.015921	1.14104e-08	0.138556
Adipose Cells	Arteriolar Tortuosity	ENSG00000178761.10	15	FAM219B	75195895	rs2290572	15	75130573	G	A	0.629726	-0.0376168	0.00304871	4.2e-38	0.172884	0.0283083	1.0141e-09	-0.217584	0.039753	4.41477e-08	0.233572
Tibial Artery	Arteriolar Tortuosity	ENSG00000178718.5	15	RPP25	75248158	rs3812945	15	75289722	C	T	0.478942	-0.0293979	0.00294208	1.1e-26	-0.629701	0.0396015	6.24199e-57	0.0466855	0.00551811	2.66431e-17	3.25364e-08
Tibial Artery	Arteriolar Tortuosity	ENSG00000168385.13	2	SEP2	242273978	rs757978	2	242371101	T	C	0.114382	0.0377952	0.00472352	2.4e-15	0.740163	0.0457967	9.35782e-59	0.0510633	0.00712101	7.45607e-13	0.00488635
Tibial Artery	Arteriolar Tortuosity	ENSG00000182472.4	19	CAPN12	39242443	rs11673323	19	39248186	C	G	0.497723	-0.0413549	0.00294137	4.4e-49	0.430758	0.0541365	1.76424e-15	-0.0960049	0.0138638	4.36463e-12	0.0376116
Tibial Artery	Arteriolar Tortuosity	ENSG00000140474.8	15	ULK3	75131997	rs9210	15	75128501	C	T	0.730149	-0.0439827	0.00330415	1.9e-43	-0.252347	0.0357488	1.67825e-12	0.174295	0.0279484	4.4804e-10	0.0501006
Tibial Artery	Arteriolar Tortuosity	ENSG00000130402.7	19	ACTN4	39180266	rs10421560	19	39186613	A	G	0.488799	-0.0427198	0.00294115	3.5e-52	0.123999	0.0184334	1.73337e-11	-0.344517	0.0564409	1.03422e-09	0.586832
Tibial Artery	Arteriolar Tortuosity	ENSG00000070087.9	3	PFN2	149725603	rs11920768	3	149702588	G	A	0.286014	0.0207329	0.00324546	4e-10	-0.443682	0.0272996	2.1512e-59	-0.0467292	0.00785963	2.75664e-09	0.395462
Tibial Artery	Arteriolar Tortuosity	ENSG00000178802.13	15	MPI	75187072	rs1133322	15	75212357	G	A	0.557823	-0.0357434	0.00298247	1.2e-37	0.19447	0.0285914	1.03388e-11	-0.183799	0.0310712	3.31045e-09	0.0113776
Tibial Artery	Arteriolar Tortuosity	ENSG00000261783.1	16	RP11-252K23.2	75414437	rs10871313	16	75507094	T	C	0.651676	0.0194853	0.00309272	9.2e-12	-0.784232	0.0647727	9.64521e-34	-0.0248463	0.00444562	2.28449e-08	0.596688
Tibial Artery	Arteriolar Tortuosity	ENSG00000268175.1	3	AC117395.1	149689800	rs11920768	3	149702588	G	A	0.286014	0.0207329	0.00324546	4e-10	-0.472521	0.0454112	2.34335e-25	-0.0438772	0.00805953	5.20572e-08	0.37154
Peripheral blood	Arteriolar Tortuosity	ILMN_1754121	15	CSK	75095374	rs936226	15	75069282	C	T	0.262643	0.0455712	0.00334399	6.4e-46	0.508209	0.0205089	1.47641e-135	0.0896701	0.00750935	7.22406e-33	0.00431873
Peripheral blood	Arteriolar Tortuosity	ILMN_1795275	4	USP53	120214145	rs1511022	4	120126233	T	C	0.120355	0.0625064	0.00440549	1e-45	0.437321	0.0284041	1.72999e-53	0.14293	0.013699	1.74094e-25	3.29095e-12
Peripheral blood	Arteriolar Tortuosity	ILMN_1679495	15	ULK3	75128880	rs1869959	15	75147332	A	C	0.268857	0.044479	0.0032647	8.2e-46	0.331701	0.0210099	3.77132e-56	0.134094	0.0130004	6.05334e-25	6.81109e-05
Peripheral blood	Arteriolar Tortuosity	ILMN_1660292	1	MRPS21	150266637	rs1260407	1	150306125	T	C	0.39348	0.0295385	0.00298822	8.1e-24	-0.616926	0.0180781	3.07651e-255	-0.0478802	0.00504284	2.20897e-21	4.27523e-10
Peripheral blood	Arteriolar Tortuosity	ILMN_1821887	19	ACTN4	39157903	rs10415219	19	39150235	G	A	0.485003	-0.0442547	0.0029378	4.4e-55	0.204167	0.0192487	2.77139e-26	-0.216758	0.0249934	4.22384e-18	0.873844
Peripheral blood	Arteriolar Tortuosity	ILMN_2101034	19	CAPN12	39221221	rs4802770	19	39223402	C	A	0.256918	0.0287602	0.00333646	3.5e-19	-0.637274	0.0199125	9.69944e-225	-0.0451301	0.0054221	8.55131e-17	3.91746e-05
Peripheral blood	Arteriolar Tortuosity	ILMN_1787514	19	CAPN12	39221321	rs4802770	19	39223402	C	A	0.256918	0.0287602	0.00333646	3.5e-19	-0.568976	0.0202983	6.86027e-173	-0.0505473	0.00613498	1.73377e-16	1.46891e-10
Peripheral blood	Arteriolar Tortuosity	ILMN_1748546	2	SEP2	242293081	rs7601738	2	242375813	T	A	0.11441	0.0376813	0.00472373	2.9e-15	1.03299	0.0281924	6.42476e-294	0.0364778	0.00467998	6.46931e-15	0.0527797
Peripheral blood	Arteriolar Tortuosity	ILMN_1761262	15	MPI	75190168	rs4886636	15	75196176	G	A	0.431794	0.0357092	0.00298122	1.3e-37	-0.152151	0.0194069	4.50501e-15	-0.234696	0.035778	5.38829e-11	0.00856266
Peripheral blood	Arteriolar Tortuosity	ILMN_1702231	1	C1ORF54	150252089	rs2274127	1	150252984	T	G	0.476332	-0.0428936	0.00292283	6.1e-50	-0.132128	0.0193208	7.99557e-12	0.324637	0.0523723	5.69508e-10	0.123012
Peripheral blood	Arteriolar Tortuosity	ILMN_1655765	1	MRPS21	150266837	rs11586047	1	150506263	T	C	0.18951	-0.0306447	0.00367262	1.4e-17	-0.215539	0.0244826	1.32311e-18	0.142177	0.0234765	1.39418e-09	0.000199098
Peripheral blood	Arteriolar Tortuosity	ILMN_1807919	2	TNS1	218667774	rs1364637	2	218708432	G	A	0.371377	0.0181594	0.00303726	6.6e-10	0.522718	0.0187777	1.53816e-170	0.0347403	0.00594302	5.04847e-09	2.82908e-16
Peripheral blood	Arteriolar Tortuosity	ILMN_1699989	1	BNIPL	151019958	rs15740	1	151040435	G	A	0.212611	-0.022202	0.00353208	1.5e-09	0.352254	0.0227906	6.86084e-54	-0.0630285	0.0108246	5.79017e-09	0.00199424
Peripheral blood	Arteriolar Tortuosity	ILMN_1758658	11	FADD	70053238	rs7937532	11	70031909	T	C	0.40443	-0.018474	0.00299448	3.8e-12	0.250751	0.0194873	6.8641e-38	-0.0736746	0.0132437	2.65182e-08	5.65373e-06
Peripheral blood	Arteriolar Tortuosity	ILMN_1747556	9	CDK9	130552088	rs10987740	9	130562464	A	G	0.402341	0.0190226	0.00298226	1.1e-10	0.208595	0.019506	1.08733e-26	0.0911941	0.016647	4.29912e-08	0.00355301

## Sheet: Table I
Table I: Ldsc genetic correlation between retinal parameters and systemic traits and disease									Legend
Trait	Correlated trait	PMID	Population Description	rg	SE	z	P.value		TOC
Arteriolar Tortuosity	Systolic blood pressure_ automated reading	--	ukbb	0.1325	0.0306	4.3284	1.5e-05
Arteriolar Tortuosity	Medication for cholesterol_ blood pressure_ diabetes_ or take exogenous hormones: None of the above	--	ukbb	-0.1365	0.037	-3.6891	0.0002
Arteriolar Tortuosity	Distance between home and job workplace	--	ukbb	0.2648	0.073	3.6256	0.0003
Arteriolar Tortuosity	Birth weight of first child	--	ukbb	-0.1316	0.0367	-3.5847	0.0003
Arteriolar Tortuosity	Non-cancer illness code_ self-reported: hypertension	--	ukbb	0.1058	0.0308	3.4317	0.0006
Arteriolar Width	Vascular/heart problems diagnosed by doctor: High blood pressure	--	ukbb	-0.3407	0.0471	-7.2257	4.98e-13
Arteriolar Width	Non-cancer illness code_ self-reported: hypertension	--	ukbb	-0.3354	0.0477	-7.0288	2.08e-12
Arteriolar Width	Vascular/heart problems diagnosed by doctor: None of the above	--	ukbb	0.3344	0.0487	6.8642	6.69e-12
Arteriolar Width	Medication for cholesterol_ blood pressure_ diabetes_ or take exogenous hormones: Blood pressure medication	--	ukbb	-0.3937	0.0597	-6.5945	4.27e-11
Arteriolar Width	Standing height	--	ukbb	0.273	0.0436	6.2652	3.72e-10
Arteriolar Width	Height_2010	20881960	ukbb	0.2922	0.053	5.5149	3.49e-08
Arteriolar Width	Sitting height	--	ukbb	0.2374	0.0437	5.4373	5.41e-08
Arteriolar Width	Systolic blood pressure_ automated reading	--	ukbb	-0.2802	0.0531	-5.2742	1.33e-07
Arteriolar Width	Comparative height size at age 10	--	ukbb	0.2384	0.0457	5.2145	1.84e-07
Arteriolar Width	Reason for glasses/contact lenses: For short-sightedness_ i.e. only or mainly for distance viewing such as driving_ cinema etc (called myopia)	--	ukbb	0.3779	0.0734	5.1467	2.65e-07
Arteriolar Width	Medication for cholesterol_ blood pressure or diabetes: Blood pressure medication	--	ukbb	-0.3139	0.061	-5.1462	2.66e-07
Arteriolar Width	Medication for cholesterol_ blood pressure or diabetes: None of the above	--	ukbb	0.3128	0.0626	5.0004	5.72e-07
Arteriolar Width	Diastolic blood pressure_ automated reading	--	ukbb	-0.2451	0.0528	-4.6429	3.44e-06
Arteriolar Width	Medication for cholesterol_ blood pressure_ diabetes_ or take exogenous hormones: None of the above	--	ukbb	0.3017	0.0666	4.527	5.98e-06
Arteriolar Width	Offspring birth weight (maternal effect)	31043758	ukbb	0.2389	0.0541	4.4176	9.98e-06
Arteriolar Width	Forced expiratory volume in 1-second (FEV1)_ predicted	--	ukbb	0.2472	0.0595	4.1577	3.21e-05
Arteriolar Width	Reason for glasses/contact lenses: For astigmatism	--	ukbb	0.4233	0.1039	4.0749	4.6e-05
Arteriolar Width	Forced expiratory volume in 1-second (FEV1)	--	ukbb	0.1859	0.0477	3.8976	9.72e-05
Venular Tortuosity	Age at first live birth	--	ukbb	-0.2033	0.0431	-4.7188	2.37e-06
Venular Tortuosity	Age at last live birth	--	ukbb	-0.2153	0.0498	-4.325	1.53e-05
Venular Tortuosity	Age completed full time education	--	ukbb	-0.1634	0.0388	-4.2112	2.54e-05
Venular Tortuosity	Qualifications: A levels/AS levels or equivalent	--	ukbb	-0.1458	0.0359	-4.0617	4.87e-05
Venular Tortuosity	Qualifications: College or University degree	--	ukbb	-0.1393	0.0348	-4.0026	6.27e-05
Venular Tortuosity	Systolic blood pressure_ automated reading	--	ukbb	0.1488	0.0374	3.984	6.78e-05
Venular Tortuosity	Usual walking pace	--	ukbb	-0.1481	0.0373	-3.9735	7.08e-05
Venular Tortuosity	Exposure to tobacco smoke outside home	--	ukbb	0.2231	0.0566	3.9432	8.04e-05
Venular Width	Trunk fat mass	--	ukbb	0.165	0.0335	4.9207	8.6256e-07
Venular Width	Whole body fat mass	--	ukbb	0.1552	0.0332	4.6743	2.9498e-06
Venular Width	Weight	--	ukbb	0.1562	0.0338	4.6177	3.8801e-06
Venular Width	Trunk fat percentage	--	ukbb	0.1498	0.0331	4.5248	6.0458e-06
Venular Width	Body fat percentage	--	ukbb	0.1414	0.0325	4.3494	1.3653e-05
Venular Width	Leg fat mass (right)	--	ukbb	0.1406	0.0335	4.1964	2.7122e-05
Venular Width	Leg fat mass (left)	--	ukbb	0.1401	0.0336	4.1724	3.0145e-05
Venular Width	Arm fat mass (right)	--	ukbb	0.1421	0.0341	4.1641	3.1263e-05
Venular Width	Arm fat mass (left)	--	ukbb	0.1388	0.0338	4.1081	3.9889e-05
Venular Width	Basal metabolic rate	--	ukbb	0.1378	0.0346	3.9811	6.8601e-05
Venular Width	Leg fat-free mass (left)	--	ukbb	0.1363	0.0345	3.9495	7.8298e-05
Venular Width	Leg predicted mass (left)	--	ukbb	0.1358	0.0345	3.9342	8.3459e-05

[truncated: 5 more sheets: Table J, Table K, Table L, Table M, Legends]
